# Supplementary material for: Introduction of a male-harming mitochondrial haplotype via ‘Trojan Females’ achieves population suppression in fruit flies
Source: eLife journal article supplement (doi:10.7554/elife.23551), 2017-05-03
Supplement: supp [file elife_poa_e23551_Figure_2_source_data.xls]

## Sheet: Offspring count Regulated
This data sheet contains the raw data for offspring number per generation for each experimental population for the regulated population size approach of Experiment 1. Each generation vials were trimmed to 80 eggs, and offspring were counted after eclosion each generation for ten generations. Each table represents one of four distinct ratios of fly pairs (one male and one female per pair) used to …				0% TFT								25% TFT								50% TFT								75% TFT
				Number of offspring	Vial ID	Biological Replicate	Starting Proportion		Generation	Number of females genotyped		Offspring	Vial ID	Biological Replicate	Starting Proportion		Generation	Number of females genotyped		Offspring	Vial ID	Biological Replicate	Starting Proportion		Generation	Number of females genotyped		Offspring	Vial ID	Biological Replicate	Starting Proportion		Generation	Number of females genotyped
							TFT (BRO)	DAH							TFT	DAH							TFT	wt							TFT	wt
				80	100_1_8	A	0	1	1	7		76	75_1_8	A	0.25	0.75	1	7		76	50_1_8	A	0.5	0.5	1	7		75	25_1_8	A	0.75	0.25	1	7
				70	100_1_8	A	0	1	2	-		68	75_1_8	A	0.25	0.75	2	-		53	50_1_8	A	0.5	0.5	2	-		75	25_1_8	A	0.75	0.25	2	-
				77	100_1_8	A	0	1	3	-		75	75_1_8	A	0.25	0.75	3	-		79	50_1_8	A	0.5	0.5	3	-		80	25_1_8	A	0.75	0.25	3	-
				76	100_1_8	A	0	1	4	-		66	75_1_8	A	0.25	0.75	4	-		73	50_1_8	A	0.5	0.5	4	-		78	25_1_8	A	0.75	0.25	4	-
				66	100_1_8	A	0	1	5	7		72	75_1_8	A	0.25	0.75	5	7		73	50_1_8	A	0.5	0.5	5	7		69	25_1_8	A	0.75	0.25	5	7
				71	100_1_8	A	0	1	6	-		72	75_1_8	A	0.25	0.75	6	-		60	50_1_8	A	0.5	0.5	6	-		64	25_1_8	A	0.75	0.25	6	-
				77	100_1_8	A	0	1	7	-		74	75_1_8	A	0.25	0.75	7	-		70	50_1_8	A	0.5	0.5	7	-		68	25_1_8	A	0.75	0.25	7	-
				76	100_1_8	A	0	1	8	-		76	75_1_8	A	0.25	0.75	8	-		69	50_1_8	A	0.5	0.5	8	-		67	25_1_8	A	0.75	0.25	8	-
				78	100_1_8	A	0	1	9	-		73	75_1_8	A	0.25	0.75	9	-		63	50_1_8	A	0.5	0.5	9	-		62	25_1_8	A	0.75	0.25	9	-
				77	100_1_8	A	0	1	10	7		66	75_1_8	A	0.25	0.75	10	7		71	50_1_8	A	0.5	0.5	10	7		68	25_1_8	A	0.75	0.25	10	7
				77	100_1_9	A	0	1	1	7		75	75_1_9	A	0.25	0.75	1	7		75	50_1_9	A	0.5	0.5	1	7		65	25_1_9	A	0.75	0.25	1	7
				65	100_1_9	A	0	1	2	-		76	75_1_9	A	0.25	0.75	2	-		51	50_1_9	A	0.5	0.5	2	-		72	25_1_9	A	0.75	0.25	2	-
				66	100_1_9	A	0	1	3	-		65	75_1_9	A	0.25	0.75	3	-		71	50_1_9	A	0.5	0.5	3	-		65	25_1_9	A	0.75	0.25	3	-
				63	100_1_9	A	0	1	4	-		63	75_1_9	A	0.25	0.75	4	-		52	50_1_9	A	0.5	0.5	4	-		75	25_1_9	A	0.75	0.25	4	-
				81	100_1_9	A	0	1	5	7		68	75_1_9	A	0.25	0.75	5	7		67	50_1_9	A	0.5	0.5	5	7		68	25_1_9	A	0.75	0.25	5	7
				76	100_1_9	A	0	1	6	-		69	75_1_9	A	0.25	0.75	6	-		70	50_1_9	A	0.5	0.5	6	-		68	25_1_9	A	0.75	0.25	6	-
				79	100_1_9	A	0	1	7	-		71	75_1_9	A	0.25	0.75	7	-		64	50_1_9	A	0.5	0.5	7	-		67	25_1_9	A	0.75	0.25	7	-
				80	100_1_9	A	0	1	8	-		78	75_1_9	A	0.25	0.75	8	-		69	50_1_9	A	0.5	0.5	8	-		69	25_1_9	A	0.75	0.25	8	-
				76	100_1_9	A	0	1	9	-		72	75_1_9	A	0.25	0.75	9	-		69	50_1_9	A	0.5	0.5	9	-		63	25_1_9	A	0.75	0.25	9	-
				76	100_1_9	A	0	1	10	7		75	75_1_9	A	0.25	0.75	10	7		70	50_1_9	A	0.5	0.5	10	7		64	25_1_9	A	0.75	0.25	10	7
				76	100_1_10	A	0	1	1	7		78	75_1_10	A	0.25	0.75	1	7		77	50_1_10	A	0.5	0.5	1	7		76	25_1_10	A	0.75	0.25	1	7
				79	100_1_10	A	0	1	2	-		63	75_1_10	A	0.25	0.75	2	-		74	50_1_10	A	0.5	0.5	2	-		77	25_1_10	A	0.75	0.25	2	-
				70	100_1_10	A	0	1	3	-		77	75_1_10	A	0.25	0.75	3	-		72	50_1_10	A	0.5	0.5	3	-		71	25_1_10	A	0.75	0.25	3	-
				76	100_1_10	A	0	1	4	-		66	75_1_10	A	0.25	0.75	4	-		74	50_1_10	A	0.5	0.5	4	-		76	25_1_10	A	0.75	0.25	4	-
				73	100_1_10	A	0	1	5	7		68	75_1_10	A	0.25	0.75	5	7		70	50_1_10	A	0.5	0.5	5	7		66	25_1_10	A	0.75	0.25	5	7
				74	100_1_10	A	0	1	6	-		71	75_1_10	A	0.25	0.75	6	-		67	50_1_10	A	0.5	0.5	6	-		66	25_1_10	A	0.75	0.25	6	-
				75	100_1_10	A	0	1	7	-		71	75_1_10	A	0.25	0.75	7	-		73	50_1_10	A	0.5	0.5	7	-		64	25_1_10	A	0.75	0.25	7	-
				74	100_1_10	A	0	1	8	-		73	75_1_10	A	0.25	0.75	8	-		67	50_1_10	A	0.5	0.5	8	-		67	25_1_10	A	0.75	0.25	8	-
				72	100_1_10	A	0	1	9	-		71	75_1_10	A	0.25	0.75	9	-		78	50_1_10	A	0.5	0.5	9	-		67	25_1_10	A	0.75	0.25	9	-
				74	100_1_10	A	0	1	10	7		69	75_1_10	A	0.25	0.75	10	7		72	50_1_10	A	0.5	0.5	10	7		64	25_1_10	A	0.75	0.25	10	7
				76	100_1_11	A	0	1	1	7		75	75_1_11	A	0.25	0.75	1	7		78	50_1_11	A	0.5	0.5	1	7		78	25_1_11	A	0.75	0.25	1	7
				78	100_1_11	A	0	1	2	-		76	75_1_11	A	0.25	0.75	2	-		75	50_1_11	A	0.5	0.5	2	-		68	25_1_11	A	0.75	0.25	2	-
				79	100_1_11	A	0	1	3	-		70	75_1_11	A	0.25	0.75	3	-		60	50_1_11	A	0.5	0.5	3	-		65	25_1_11	A	0.75	0.25	3	-
				75	100_1_11	A	0	1	4	-		74	75_1_11	A	0.25	0.75	4	-		70	50_1_11	A	0.5	0.5	4	-		73	25_1_11	A	0.75	0.25	4	-
				80	100_1_11	A	0	1	5	7		80	75_1_11	A	0.25	0.75	5	7		74	50_1_11	A	0.5	0.5	5	7		63	25_1_11	A	0.75	0.25	5	7
				76	100_1_11	A	0	1	6	-		71	75_1_11	A	0.25	0.75	6	-		71	50_1_11	A	0.5	0.5	6	-		71	25_1_11	A	0.75	0.25	6	-
				77	100_1_11	A	0	1	7	-		72	75_1_11	A	0.25	0.75	7	-		66	50_1_11	A	0.5	0.5	7	-		66	25_1_11	A	0.75	0.25	7	-
				71	100_1_11	A	0	1	8	-		75	75_1_11	A	0.25	0.75	8	-		65	50_1_11	A	0.5	0.5	8	-		69	25_1_11	A	0.75	0.25	8	-
				69	100_1_11	A	0	1	9	-		73	75_1_11	A	0.25	0.75	9	-		73	50_1_11	A	0.5	0.5	9	-		69	25_1_11	A	0.75	0.25	9	-
				70	100_1_11	A	0	1	10	7		79	75_1_11	A	0.25	0.75	10	7		66	50_1_11	A	0.5	0.5	10	7		65	25_1_11	A	0.75	0.25	10	7
				73	100_1_12	A	0	1	1	7		76	75_1_12	A	0.25	0.75	1	7		79	50_1_12	A	0.5	0.5	1	7		79	25_1_12	A	0.75	0.25	1	7
				48	100_1_12	A	0	1	2	-		78	75_1_12	A	0.25	0.75	2	-		79	50_1_12	A	0.5	0.5	2	-		70	25_1_12	A	0.75	0.25	2	-
				72	100_1_12	A	0	1	3	-		76	75_1_12	A	0.25	0.75	3	-		53	50_1_12	A	0.5	0.5	3	-		72	25_1_12	A	0.75	0.25	3	-
				75	100_1_12	A	0	1	4	-		80	75_1_12	A	0.25	0.75	4	-		74	50_1_12	A	0.5	0.5	4	-		65	25_1_12	A	0.75	0.25	4	-
				80	100_1_12	A	0	1	5	7		73	75_1_12	A	0.25	0.75	5	7		71	50_1_12	A	0.5	0.5	5	7		73	25_1_12	A	0.75	0.25	5	7
				76	100_1_12	A	0	1	6	-		72	75_1_12	A	0.25	0.75	6	-		65	50_1_12	A	0.5	0.5	6	-		73	25_1_12	A	0.75	0.25	6	-
				69	100_1_12	A	0	1	7	-		71	75_1_12	A	0.25	0.75	7	-		71	50_1_12	A	0.5	0.5	7	-		69	25_1_12	A	0.75	0.25	7	-
				77	100_1_12	A	0	1	8	-		75	75_1_12	A	0.25	0.75	8	-		66	50_1_12	A	0.5	0.5	8	-		74	25_1_12	A	0.75	0.25	8	-
				71	100_1_12	A	0	1	9	-		69	75_1_12	A	0.25	0.75	9	-		70	50_1_12	A	0.5	0.5	9	-		71	25_1_12	A	0.75	0.25	9	-
				0	100_1_12	A	0	1	10	7		68	75_1_12	A	0.25	0.75	10	7		68	50_1_12	A	0.5	0.5	10	7		67	25_1_12	A	0.75	0.25	10	7
				77	100_1_13	A	0	1	1	7		80	75_1_13	A	0.25	0.75	1	7		79	50_1_13	A	0.5	0.5	1	7		75	25_1_13	A	0.75	0.25	1	7
				57	100_1_13	A	0	1	2	-		71	75_1_13	A	0.25	0.75	2	-		75	50_1_13	A	0.5	0.5	2	-		67	25_1_13	A	0.75	0.25	2	-
				70	100_1_13	A	0	1	3	-		67	75_1_13	A	0.25	0.75	3	-		78	50_1_13	A	0.5	0.5	3	-		62	25_1_13	A	0.75	0.25	3	-
				70	100_1_13	A	0	1	4	-		77	75_1_13	A	0.25	0.75	4	-		79	50_1_13	A	0.5	0.5	4	-		67	25_1_13	A	0.75	0.25	4	-
				74	100_1_13	A	0	1	5	7		77	75_1_13	A	0.25	0.75	5	7		72	50_1_13	A	0.5	0.5	5	7		68	25_1_13	A	0.75	0.25	5	7
				72	100_1_13	A	0	1	6	-		71	75_1_13	A	0.25	0.75	6	-		69	50_1_13	A	0.5	0.5	6	-		62	25_1_13	A	0.75	0.25	6	-
				70	100_1_13	A	0	1	7	-		73	75_1_13	A	0.25	0.75	7	-		67	50_1_13	A	0.5	0.5	7	-		61	25_1_13	A	0.75	0.25	7	-
				78	100_1_13	A	0	1	8	-		76	75_1_13	A	0.25	0.75	8	-		67	50_1_13	A	0.5	0.5	8	-		64	25_1_13	A	0.75	0.25	8	-
				71	100_1_13	A	0	1	9	-		74	75_1_13	A	0.25	0.75	9	-		65	50_1_13	A	0.5	0.5	9	-		63	25_1_13	A	0.75	0.25	9	-
				76	100_1_13	A	0	1	10	7		69	75_1_13	A	0.25	0.75	10	7		68	50_1_13	A	0.5	0.5	10	7		65	25_1_13	A	0.75	0.25	10	7
				78	100_1_14	A	0	1	1	7		77	75_1_14	A	0.25	0.75	1	7		77	50_1_14	A	0.5	0.5	1	7		78	25_1_14	A	0.75	0.25	1	7
				70	100_1_14	A	0	1	2	-		76	75_1_14	A	0.25	0.75	2	-		73	50_1_14	A	0.5	0.5	2	-		63	25_1_14	A	0.75	0.25	2	-
				67	100_1_14	A	0	1	3	-		81	75_1_14	A	0.25	0.75	3	-		74	50_1_14	A	0.5	0.5	3	-		83	25_1_14	A	0.75	0.25	3	-
				49	100_1_14	A	0	1	4	-		71	75_1_14	A	0.25	0.75	4	-		80	50_1_14	A	0.5	0.5	4	-		72	25_1_14	A	0.75	0.25	4	-
				70	100_1_14	A	0	1	5	7		79	75_1_14	A	0.25	0.75	5	7		72	50_1_14	A	0.5	0.5	5	7		61	25_1_14	A	0.75	0.25	5	7
				75	100_1_14	A	0	1	6	-		69	75_1_14	A	0.25	0.75	6	-		66	50_1_14	A	0.5	0.5	6	-		65	25_1_14	A	0.75	0.25	6	-
				79	100_1_14	A	0	1	7	-		71	75_1_14	A	0.25	0.75	7	-		69	50_1_14	A	0.5	0.5	7	-		64	25_1_14	A	0.75	0.25	7	-
				65	100_1_14	A	0	1	8	-		75	75_1_14	A	0.25	0.75	8	-		63	50_1_14	A	0.5	0.5	8	-		70	25_1_14	A	0.75	0.25	8	-
				73	100_1_14	A	0	1	9	-		80	75_1_14	A	0.25	0.75	9	-		65	50_1_14	A	0.5	0.5	9	-		72	25_1_14	A	0.75	0.25	9	-
				70	100_1_14	A	0	1	10	7		74	75_1_14	A	0.25	0.75	10	7		61	50_1_14	A	0.5	0.5	10	7		66	25_1_14	A	0.75	0.25	10	7
				74	100_2_8	B	0	1	1	7		74	75_2_8	B	0.25	0.75	1	7		79	50_2_8	B	0.5	0.5	1	7		74	25_2_8	B	0.75	0.25	1	7
				56	100_2_8	B	0	1	2	-		70	75_2_8	B	0.25	0.75	2	-		82	50_2_8	B	0.5	0.5	2	-		68	25_2_8	B	0.75	0.25	2	-
				69	100_2_8	B	0	1	3	-		70	75_2_8	B	0.25	0.75	3	-		65	50_2_8	B	0.5	0.5	3	-		64	25_2_8	B	0.75	0.25	3	-
				72	100_2_8	B	0	1	4	-		61	75_2_8	B	0.25	0.75	4	-		70	50_2_8	B	0.5	0.5	4	-		72	25_2_8	B	0.75	0.25	4	-
				72	100_2_8	B	0	1	5	7		73	75_2_8	B	0.25	0.75	5	7		74	50_2_8	B	0.5	0.5	5	7		66	25_2_8	B	0.75	0.25	5	7
				70	100_2_8	B	0	1	6	-		73	75_2_8	B	0.25	0.75	6	-		71	50_2_8	B	0.5	0.5	6	-		69	25_2_8	B	0.75	0.25	6	-
				68	100_2_8	B	0	1	7	-		76	75_2_8	B	0.25	0.75	7	-		64	50_2_8	B	0.5	0.5	7	-		65	25_2_8	B	0.75	0.25	7	-
				73	100_2_8	B	0	1	8	-		75	75_2_8	B	0.25	0.75	8	-		66	50_2_8	B	0.5	0.5	8	-		68	25_2_8	B	0.75	0.25	8	-
				75	100_2_8	B	0	1	9	-		71	75_2_8	B	0.25	0.75	9	-		70	50_2_8	B	0.5	0.5	9	-		67	25_2_8	B	0.75	0.25	9	-
				77	100_2_8	B	0	1	10	7		76	75_2_8	B	0.25	0.75	10	7		53	50_2_8	B	0.5	0.5	10	7		66	25_2_8	B	0.75	0.25	10	7
				75	100_2_9	B	0	1	1	7		71	75_2_9	B	0.25	0.75	1	7		73	50_2_9	B	0.5	0.5	1	7		74	25_2_9	B	0.75	0.25	1	7
				80	100_2_9	B	0	1	2	-		73	75_2_9	B	0.25	0.75	2	-		67	50_2_9	B	0.5	0.5	2	-		73	25_2_9	B	0.75	0.25	2	-
				71	100_2_9	B	0	1	3	-		75	75_2_9	B	0.25	0.75	3	-		67	50_2_9	B	0.5	0.5	3	-		80	25_2_9	B	0.75	0.25	3	-
				67	100_2_9	B	0	1	4	-		79	75_2_9	B	0.25	0.75	4	-		69	50_2_9	B	0.5	0.5	4	-		70	25_2_9	B	0.75	0.25	4	-
				70	100_2_9	B	0	1	5	7		71	75_2_9	B	0.25	0.75	5	7		53	50_2_9	B	0.5	0.5	5	7		69	25_2_9	B	0.75	0.25	5	7
				78	100_2_9	B	0	1	6	-		74	75_2_9	B	0.25	0.75	6	-		67	50_2_9	B	0.5	0.5	6	-		67	25_2_9	B	0.75	0.25	6	-
				70	100_2_9	B	0	1	7	-		67	75_2_9	B	0.25	0.75	7	-		73	50_2_9	B	0.5	0.5	7	-		64	25_2_9	B	0.75	0.25	7	-
				76	100_2_9	B	0	1	8	-		72	75_2_9	B	0.25	0.75	8	-		66	50_2_9	B	0.5	0.5	8	-		66	25_2_9	B	0.75	0.25	8	-
				69	100_2_9	B	0	1	9	-		72	75_2_9	B	0.25	0.75	9	-		73	50_2_9	B	0.5	0.5	9	-		60	25_2_9	B	0.75	0.25	9	-
				72	100_2_9	B	0	1	10	7		71	75_2_9	B	0.25	0.75	10	7		69	50_2_9	B	0.5	0.5	10	7		64	25_2_9	B	0.75	0.25	10	7
				78	100_2_10	B	0	1	1	7		78	75_2_10	B	0.25	0.75	1	7		83	50_2_10	B	0.5	0.5	1	7		75	25_2_10	B	0.75	0.25	1	7
				73	100_2_10	B	0	1	2	-		60	75_2_10	B	0.25	0.75	2	-		72	50_2_10	B	0.5	0.5	2	-		72	25_2_10	B	0.75	0.25	2	-
				69	100_2_10	B	0	1	3	-		66	75_2_10	B	0.25	0.75	3	-		66	50_2_10	B	0.5	0.5	3	-		69	25_2_10	B	0.75	0.25	3	-
				67	100_2_10	B	0	1	4	-		57	75_2_10	B	0.25	0.75	4	-		70	50_2_10	B	0.5	0.5	4	-		72	25_2_10	B	0.75	0.25	4	-
				71	100_2_10	B	0	1	5	7		73	75_2_10	B	0.25	0.75	5	7		73	50_2_10	B	0.5	0.5	5	7		67	25_2_10	B	0.75	0.25	5	7
				68	100_2_10	B	0	1	6	-		73	75_2_10	B	0.25	0.75	6	-		70	50_2_10	B	0.5	0.5	6	-		69	25_2_10	B	0.75	0.25	6	-
				70	100_2_10	B	0	1	7	-		76	75_2_10	B	0.25	0.75	7	-		63	50_2_10	B	0.5	0.5	7	-		72	25_2_10	B	0.75	0.25	7	-
				69	100_2_10	B	0	1	8	-		70	75_2_10	B	0.25	0.75	8	-		74	50_2_10	B	0.5	0.5	8	-		65	25_2_10	B	0.75	0.25	8	-
				69	100_2_10	B	0	1	9	-		73	75_2_10	B	0.25	0.75	9	-		64	50_2_10	B	0.5	0.5	9	-		66	25_2_10	B	0.75	0.25	9	-
				74	100_2_10	B	0	1	10	7		68	75_2_10	B	0.25	0.75	10	7		65	50_2_10	B	0.5	0.5	10	7		64	25_2_10	B	0.75	0.25	10	7
				77	100_2_11	B	0	1	1	7		77	75_2_11	B	0.25	0.75	1	7		77	50_2_11	B	0.5	0.5	1	7		67	25_2_11	B	0.75	0.25	1	7
				70	100_2_11	B	0	1	2	-		66	75_2_11	B	0.25	0.75	2	-		71	50_2_11	B	0.5	0.5	2	-		75	25_2_11	B	0.75	0.25	2	-
				78	100_2_11	B	0	1	3	-		71	75_2_11	B	0.25	0.75	3	-		66	50_2_11	B	0.5	0.5	3	-		74	25_2_11	B	0.75	0.25	3	-
				66	100_2_11	B	0	1	4	-		72	75_2_11	B	0.25	0.75	4	-		72	50_2_11	B	0.5	0.5	4	-		65	25_2_11	B	0.75	0.25	4	-
				71	100_2_11	B	0	1	5	7		76	75_2_11	B	0.25	0.75	5	7		71	50_2_11	B	0.5	0.5	5	7		72	25_2_11	B	0.75	0.25	5	7
				73	100_2_11	B	0	1	6	-		70	75_2_11	B	0.25	0.75	6	-		72	50_2_11	B	0.5	0.5	6	-		66	25_2_11	B	0.75	0.25	6	-
				73	100_2_11	B	0	1	7	-		70	75_2_11	B	0.25	0.75	7	-		63	50_2_11	B	0.5	0.5	7	-		71	25_2_11	B	0.75	0.25	7	-
				74	100_2_11	B	0	1	8	-		58	75_2_11	B	0.25	0.75	8	-		71	50_2_11	B	0.5	0.5	8	-		69	25_2_11	B	0.75	0.25	8	-
				73	100_2_11	B	0	1	9	-		72	75_2_11	B	0.25	0.75	9	-		68	50_2_11	B	0.5	0.5	9	-		66	25_2_11	B	0.75	0.25	9	-
				75	100_2_11	B	0	1	10	7		74	75_2_11	B	0.25	0.75	10	7		63	50_2_11	B	0.5	0.5	10	7		67	25_2_11	B	0.75	0.25	10	7
				76	100_2_12	B	0	1	1	7		75	75_2_12	B	0.25	0.75	1	7		77	50_2_12	B	0.5	0.5	1	7		74	25_2_12	B	0.75	0.25	1	7
				72	100_2_12	B	0	1	2	-		78	75_2_12	B	0.25	0.75	2	-		66	50_2_12	B	0.5	0.5	2	-		62	25_2_12	B	0.75	0.25	2	-
				82	100_2_12	B	0	1	3	-		62	75_2_12	B	0.25	0.75	3	-		70	50_2_12	B	0.5	0.5	3	-		60	25_2_12	B	0.75	0.25	3	-
				73	100_2_12	B	0	1	4	-		80	75_2_12	B	0.25	0.75	4	-		70	50_2_12	B	0.5	0.5	4	-		62	25_2_12	B	0.75	0.25	4	-
				80	100_2_12	B	0	1	5	7		75	75_2_12	B	0.25	0.75	5	7		57	50_2_12	B	0.5	0.5	5	7		65	25_2_12	B	0.75	0.25	5	7
				70	100_2_12	B	0	1	6	-		72	75_2_12	B	0.25	0.75	6	-		66	50_2_12	B	0.5	0.5	6	-		72	25_2_12	B	0.75	0.25	6	-
				78	100_2_12	B	0	1	7	-		68	75_2_12	B	0.25	0.75	7	-		69	50_2_12	B	0.5	0.5	7	-		67	25_2_12	B	0.75	0.25	7	-
				75	100_2_12	B	0	1	8	-		76	75_2_12	B	0.25	0.75	8	-		69	50_2_12	B	0.5	0.5	8	-		67	25_2_12	B	0.75	0.25	8	-
				74	100_2_12	B	0	1	9	-		73	75_2_12	B	0.25	0.75	9	-		67	50_2_12	B	0.5	0.5	9	-		64	25_2_12	B	0.75	0.25	9	-
				77	100_2_12	B	0	1	10	7		79	75_2_12	B	0.25	0.75	10	7		69	50_2_12	B	0.5	0.5	10	7		72	25_2_12	B	0.75	0.25	10	7
				62	100_2_13	B	0	1	1	7		76	75_2_13	B	0.25	0.75	1	7		74	50_2_13	B	0.5	0.5	1	7		76	25_2_13	B	0.75	0.25	1	7
				77	100_2_13	B	0	1	2	-		64	75_2_13	B	0.25	0.75	2	-		56	50_2_13	B	0.5	0.5	2	-		69	25_2_13	B	0.75	0.25	2	-
				73	100_2_13	B	0	1	3	-		72	75_2_13	B	0.25	0.75	3	-		57	50_2_13	B	0.5	0.5	3	-		77	25_2_13	B	0.75	0.25	3	-
				70	100_2_13	B	0	1	4	-		62	75_2_13	B	0.25	0.75	4	-		69	50_2_13	B	0.5	0.5	4	-		65	25_2_13	B	0.75	0.25	4	-
				65	100_2_13	B	0	1	5	7		63	75_2_13	B	0.25	0.75	5	7		71	50_2_13	B	0.5	0.5	5	7		65	25_2_13	B	0.75	0.25	5	7
				75	100_2_13	B	0	1	6	-		75	75_2_13	B	0.25	0.75	6	-		63	50_2_13	B	0.5	0.5	6	-		63	25_2_13	B	0.75	0.25	6	-
				74	100_2_13	B	0	1	7	-		70	75_2_13	B	0.25	0.75	7	-		71	50_2_13	B	0.5	0.5	7	-		67	25_2_13	B	0.75	0.25	7	-
				73	100_2_13	B	0	1	8	-		70	75_2_13	B	0.25	0.75	8	-		71	50_2_13	B	0.5	0.5	8	-		69	25_2_13	B	0.75	0.25	8	-
				72	100_2_13	B	0	1	9	-		75	75_2_13	B	0.25	0.75	9	-		62	50_2_13	B	0.5	0.5	9	-		65	25_2_13	B	0.75	0.25	9	-
				79	100_2_13	B	0	1	10	7		72	75_2_13	B	0.25	0.75	10	7		66	50_2_13	B	0.5	0.5	10	7		63	25_2_13	B	0.75	0.25	10	7
				81	100_2_14	B	0	1	1	7		77	75_2_14	B	0.25	0.75	1	7		80	50_2_14	B	0.5	0.5	1	7		76	25_2_14	B	0.75	0.25	1	7
				67	100_2_14	B	0	1	2	-		67	75_2_14	B	0.25	0.75	2	-		63	50_2_14	B	0.5	0.5	2	-		66	25_2_14	B	0.75	0.25	2	-
				65	100_2_14	B	0	1	3	-		71	75_2_14	B	0.25	0.75	3	-		76	50_2_14	B	0.5	0.5	3	-		76	25_2_14	B	0.75	0.25	3	-
				67	100_2_14	B	0	1	4	-		79	75_2_14	B	0.25	0.75	4	-		61	50_2_14	B	0.5	0.5	4	-		63	25_2_14	B	0.75	0.25	4	-
				71	100_2_14	B	0	1	5	7		68	75_2_14	B	0.25	0.75	5	7		73	50_2_14	B	0.5	0.5	5	7		55	25_2_14	B	0.75	0.25	5	7
				72	100_2_14	B	0	1	6	-		74	75_2_14	B	0.25	0.75	6	-		66	50_2_14	B	0.5	0.5	6	-		67	25_2_14	B	0.75	0.25	6	-
				74	100_2_14	B	0	1	7	-		76	75_2_14	B	0.25	0.75	7	-		70	50_2_14	B	0.5	0.5	7	-		66	25_2_14	B	0.75	0.25	7	-
				78	100_2_14	B	0	1	8	-		67	75_2_14	B	0.25	0.75	8	-		73	50_2_14	B	0.5	0.5	8	-		67	25_2_14	B	0.75	0.25	8	-
				73	100_2_14	B	0	1	9	-		71	75_2_14	B	0.25	0.75	9	-		65	50_2_14	B	0.5	0.5	9	-		64	25_2_14	B	0.75	0.25	9	-
				78	100_2_14	B	0	1	10	7		72	75_2_14	B	0.25	0.75	10	7		72	50_2_14	B	0.5	0.5	10	7		66	25_2_14	B	0.75	0.25	10	7
				78	100_3_8	C	0	1	1	7		79	75_3_8	C	0.25	0.75	1	7		78	50_3_8	C	0.5	0.5	1	7		78	25_3_8	C	0.75	0.25	1	7
				79	100_3_8	C	0	1	2	-		76	75_3_8	C	0.25	0.75	2	-		82	50_3_8	C	0.5	0.5	2	-		67	25_3_8	C	0.75	0.25	2	-
				83	100_3_8	C	0	1	3	-		71	75_3_8	C	0.25	0.75	3	-		72	50_3_8	C	0.5	0.5	3	-		60	25_3_8	C	0.75	0.25	3	-
				80	100_3_8	C	0	1	4	-		80	75_3_8	C	0.25	0.75	4	-		71	50_3_8	C	0.5	0.5	4	-		73	25_3_8	C	0.75	0.25	4	-
				79	100_3_8	C	0	1	5	7		75	75_3_8	C	0.25	0.75	5	7		70	50_3_8	C	0.5	0.5	5	7		69	25_3_8	C	0.75	0.25	5	7
				69	100_3_8	C	0	1	6	-		69	75_3_8	C	0.25	0.75	6	-		66	50_3_8	C	0.5	0.5	6	-		67	25_3_8	C	0.75	0.25	6	-
				75	100_3_8	C	0	1	7	-		71	75_3_8	C	0.25	0.75	7	-		65	50_3_8	C	0.5	0.5	7	-		70	25_3_8	C	0.75	0.25	7	-
				72	100_3_8	C	0	1	8	-		71	75_3_8	C	0.25	0.75	8	-		67	50_3_8	C	0.5	0.5	8	-		64	25_3_8	C	0.75	0.25	8	-
				74	100_3_8	C	0	1	9	-		70	75_3_8	C	0.25	0.75	9	-		70	50_3_8	C	0.5	0.5	9	-		69	25_3_8	C	0.75	0.25	9	-
				77	100_3_8	C	0	1	10	7		68	75_3_8	C	0.25	0.75	10	7		70	50_3_8	C	0.5	0.5	10	7		70	25_3_8	C	0.75	0.25	10	7
				75	100_3_9	C	0	1	1	7		74	75_3_9	C	0.25	0.75	1	7		77	50_3_9	C	0.5	0.5	1	7		77	25_3_9	C	0.75	0.25	1	7
				75	100_3_9	C	0	1	2	-		73	75_3_9	C	0.25	0.75	2	-		71	50_3_9	C	0.5	0.5	2	-		75	25_3_9	C	0.75	0.25	2	-
				74	100_3_9	C	0	1	3	-		79	75_3_9	C	0.25	0.75	3	-		73	50_3_9	C	0.5	0.5	3	-		78	25_3_9	C	0.75	0.25	3	-
				71	100_3_9	C	0	1	4	-		84	75_3_9	C	0.25	0.75	4	-		72	50_3_9	C	0.5	0.5	4	-		66	25_3_9	C	0.75	0.25	4	-
				76	100_3_9	C	0	1	5	7		80	75_3_9	C	0.25	0.75	5	7		69	50_3_9	C	0.5	0.5	5	7		65	25_3_9	C	0.75	0.25	5	7
				69	100_3_9	C	0	1	6	-		71	75_3_9	C	0.25	0.75	6	-		65	50_3_9	C	0.5	0.5	6	-		72	25_3_9	C	0.75	0.25	6	-
				67	100_3_9	C	0	1	7	-		75	75_3_9	C	0.25	0.75	7	-		59	50_3_9	C	0.5	0.5	7	-		66	25_3_9	C	0.75	0.25	7	-
				67	100_3_9	C	0	1	8	-		78	75_3_9	C	0.25	0.75	8	-		63	50_3_9	C	0.5	0.5	8	-		67	25_3_9	C	0.75	0.25	8	-
				75	100_3_9	C	0	1	9	-		70	75_3_9	C	0.25	0.75	9	-		64	50_3_9	C	0.5	0.5	9	-		71	25_3_9	C	0.75	0.25	9	-
				62	100_3_9	C	0	1	10	7		75	75_3_9	C	0.25	0.75	10	7		72	50_3_9	C	0.5	0.5	10	7		68	25_3_9	C	0.75	0.25	10	7
				67	100_3_10	C	0	1	1	7		77	75_3_10	C	0.25	0.75	1	7		76	50_3_10	C	0.5	0.5	1	7		75	25_3_10	C	0.75	0.25	1	7
				66	100_3_10	C	0	1	2	-		52	75_3_10	C	0.25	0.75	2	-		70	50_3_10	C	0.5	0.5	2	-		73	25_3_10	C	0.75	0.25	2	-
				78	100_3_10	C	0	1	3	-		83	75_3_10	C	0.25	0.75	3	-		79	50_3_10	C	0.5	0.5	3	-		75	25_3_10	C	0.75	0.25	3	-
				75	100_3_10	C	0	1	4	-		70	75_3_10	C	0.25	0.75	4	-		73	50_3_10	C	0.5	0.5	4	-		66	25_3_10	C	0.75	0.25	4	-
				76	100_3_10	C	0	1	5	7		75	75_3_10	C	0.25	0.75	5	7		72	50_3_10	C	0.5	0.5	5	7		70	25_3_10	C	0.75	0.25	5	7
				79	100_3_10	C	0	1	6	-		69	75_3_10	C	0.25	0.75	6	-		66	50_3_10	C	0.5	0.5	6	-		63	25_3_10	C	0.75	0.25	6	-
				76	100_3_10	C	0	1	7	-		74	75_3_10	C	0.25	0.75	7	-		71	50_3_10	C	0.5	0.5	7	-		69	25_3_10	C	0.75	0.25	7	-
				77	100_3_10	C	0	1	8	-		77	75_3_10	C	0.25	0.75	8	-		68	50_3_10	C	0.5	0.5	8	-		64	25_3_10	C	0.75	0.25	8	-
				75	100_3_10	C	0	1	9	-		79	75_3_10	C	0.25	0.75	9	-		69	50_3_10	C	0.5	0.5	9	-		65	25_3_10	C	0.75	0.25	9	-
				80	100_3_10	C	0	1	10	7		69	75_3_10	C	0.25	0.75	10	7		69	50_3_10	C	0.5	0.5	10	7		66	25_3_10	C	0.75	0.25	10	7
				74	100_3_11	C	0	1	1	7		79	75_3_11	C	0.25	0.75	1	7		76	50_3_11	C	0.5	0.5	1	7		79	25_3_11	C	0.75	0.25	1	7
				77	100_3_11	C	0	1	2	-		81	75_3_11	C	0.25	0.75	2	-		77	50_3_11	C	0.5	0.5	2	-		80	25_3_11	C	0.75	0.25	2	-
				81	100_3_11	C	0	1	3	-		75	75_3_11	C	0.25	0.75	3	-		80	50_3_11	C	0.5	0.5	3	-		66	25_3_11	C	0.75	0.25	3	-
				77	100_3_11	C	0	1	4	-		80	75_3_11	C	0.25	0.75	4	-		64	50_3_11	C	0.5	0.5	4	-		77	25_3_11	C	0.75	0.25	4	-
				76	100_3_11	C	0	1	5	7		70	75_3_11	C	0.25	0.75	5	7		64	50_3_11	C	0.5	0.5	5	7		72	25_3_11	C	0.75	0.25	5	7
				66	100_3_11	C	0	1	6	-		70	75_3_11	C	0.25	0.75	6	-		65	50_3_11	C	0.5	0.5	6	-		70	25_3_11	C	0.75	0.25	6	-
				69	100_3_11	C	0	1	7	-		76	75_3_11	C	0.25	0.75	7	-		69	50_3_11	C	0.5	0.5	7	-		65	25_3_11	C	0.75	0.25	7	-
				73	100_3_11	C	0	1	8	-		74	75_3_11	C	0.25	0.75	8	-		55	50_3_11	C	0.5	0.5	8	-		59	25_3_11	C	0.75	0.25	8	-
				74	100_3_11	C	0	1	9	-		73	75_3_11	C	0.25	0.75	9	-		69	50_3_11	C	0.5	0.5	9	-		64	25_3_11	C	0.75	0.25	9	-
				69	100_3_11	C	0	1	10	7		76	75_3_11	C	0.25	0.75	10	7		73	50_3_11	C	0.5	0.5	10	7		62	25_3_11	C	0.75	0.25	10	7
				75	100_3_12	C	0	1	1	7		80	75_3_12	C	0.25	0.75	1	7		79	50_3_12	C	0.5	0.5	1	7		74	25_3_12	C	0.75	0.25	1	7
				79	100_3_12	C	0	1	2	-		81	75_3_12	C	0.25	0.75	2	-		81	50_3_12	C	0.5	0.5	2	-		77	25_3_12	C	0.75	0.25	2	-
				79	100_3_12	C	0	1	3	-		72	75_3_12	C	0.25	0.75	3	-		73	50_3_12	C	0.5	0.5	3	-		74	25_3_12	C	0.75	0.25	3	-
				81	100_3_12	C	0	1	4	-		72	75_3_12	C	0.25	0.75	4	-		77	50_3_12	C	0.5	0.5	4	-		80	25_3_12	C	0.75	0.25	4	-
				79	100_3_12	C	0	1	5	7		73	75_3_12	C	0.25	0.75	5	7		73	50_3_12	C	0.5	0.5	5	7		80	25_3_12	C	0.75	0.25	5	7
				71	100_3_12	C	0	1	6	-		71	75_3_12	C	0.25	0.75	6	-		63	50_3_12	C	0.5	0.5	6	-		72	25_3_12	C	0.75	0.25	6	-
				74	100_3_12	C	0	1	7	-		68	75_3_12	C	0.25	0.75	7	-		71	50_3_12	C	0.5	0.5	7	-		77	25_3_12	C	0.75	0.25	7	-
				74	100_3_12	C	0	1	8	-		69	75_3_12	C	0.25	0.75	8	-		62	50_3_12	C	0.5	0.5	8	-		77	25_3_12	C	0.75	0.25	8	-
				78	100_3_12	C	0	1	9	-		74	75_3_12	C	0.25	0.75	9	-		67	50_3_12	C	0.5	0.5	9	-		71	25_3_12	C	0.75	0.25	9	-
				79	100_3_12	C	0	1	10	7		70	75_3_12	C	0.25	0.75	10	7		67	50_3_12	C	0.5	0.5	10	7		76	25_3_12	C	0.75	0.25	10	7
				78	100_3_13	C	0	1	1	7		77	75_3_13	C	0.25	0.75	1	7		77	50_3_13	C	0.5	0.5	1	7		79	25_3_13	C	0.75	0.25	1	7
				73	100_3_13	C	0	1	2	-		82	75_3_13	C	0.25	0.75	2	-		67	50_3_13	C	0.5	0.5	2	-		81	25_3_13	C	0.75	0.25	2	-
				77	100_3_13	C	0	1	3	-		76	75_3_13	C	0.25	0.75	3	-		72	50_3_13	C	0.5	0.5	3	-		68	25_3_13	C	0.75	0.25	3	-
				72	100_3_13	C	0	1	4	-		75	75_3_13	C	0.25	0.75	4	-		72	50_3_13	C	0.5	0.5	4	-		59	25_3_13	C	0.75	0.25	4	-
				78	100_3_13	C	0	1	5	7		62	75_3_13	C	0.25	0.75	5	7		71	50_3_13	C	0.5	0.5	5	7		66	25_3_13	C	0.75	0.25	5	7
				73	100_3_13	C	0	1	6	-		69	75_3_13	C	0.25	0.75	6	-		68	50_3_13	C	0.5	0.5	6	-		59	25_3_13	C	0.75	0.25	6	-
				76	100_3_13	C	0	1	7	-		71	75_3_13	C	0.25	0.75	7	-		65	50_3_13	C	0.5	0.5	7	-		65	25_3_13	C	0.75	0.25	7	-
				74	100_3_13	C	0	1	8	-		71	75_3_13	C	0.25	0.75	8	-		69	50_3_13	C	0.5	0.5	8	-		66	25_3_13	C	0.75	0.25	8	-
				77	100_3_13	C	0	1	9	-		65	75_3_13	C	0.25	0.75	9	-		62	50_3_13	C	0.5	0.5	9	-		68	25_3_13	C	0.75	0.25	9	-
				71	100_3_13	C	0	1	10	7		66	75_3_13	C	0.25	0.75	10	7		65	50_3_13	C	0.5	0.5	10	7		66	25_3_13	C	0.75	0.25	10	7
				66	100_3_14	C	0	1	1	7		70	75_3_14	C	0.25	0.75	1	7		75	50_3_14	C	0.5	0.5	1	7		79	25_3_14	C	0.75	0.25	1	7
				81	100_3_14	C	0	1	2	-		67	75_3_14	C	0.25	0.75	2	-		78	50_3_14	C	0.5	0.5	2	-		68	25_3_14	C	0.75	0.25	2	-
				72	100_3_14	C	0	1	3	-		72	75_3_14	C	0.25	0.75	3	-		74	50_3_14	C	0.5	0.5	3	-		76	25_3_14	C	0.75	0.25	3	-
				80	100_3_14	C	0	1	4	-		79	75_3_14	C	0.25	0.75	4	-		74	50_3_14	C	0.5	0.5	4	-		68	25_3_14	C	0.75	0.25	4	-
				80	100_3_14	C	0	1	5	7		65	75_3_14	C	0.25	0.75	5	7		76	50_3_14	C	0.5	0.5	5	7		72	25_3_14	C	0.75	0.25	5	7
				72	100_3_14	C	0	1	6	-		69	75_3_14	C	0.25	0.75	6	-		64	50_3_14	C	0.5	0.5	6	-		63	25_3_14	C	0.75	0.25	6	-
				73	100_3_14	C	0	1	7	-		76	75_3_14	C	0.25	0.75	7	-		69	50_3_14	C	0.5	0.5	7	-		66	25_3_14	C	0.75	0.25	7	-
				74	100_3_14	C	0	1	8	-		68	75_3_14	C	0.25	0.75	8	-		63	50_3_14	C	0.5	0.5	8	-		69	25_3_14	C	0.75	0.25	8	-
				72	100_3_14	C	0	1	9	-		73	75_3_14	C	0.25	0.75	9	-		66	50_3_14	C	0.5	0.5	9	-		54	25_3_14	C	0.75	0.25	9	-
				70	100_3_14	C	0	1	10	7		77	75_3_14	C	0.25	0.75	10	7		67	50_3_14	C	0.5	0.5	10	7		65	25_3_14	C	0.75	0.25	10	7
