# Supplementary material for: Introduction of a male-harming mitochondrial haplotype via ‘Trojan Females’ achieves population suppression in fruit flies
Source: eLife journal article supplement (doi:10.7554/elife.23551), 2017-05-03
Supplement: supp [file elife_poa_e23551_Figure_3_Source_data.xls]

## Sheet: Offspring + TFTfreq regulated
				BRO	DAH	Experimental population	Biological Replicate	Treatment	Generation	Offspring
This data sheet contains the combined raw data for (1) offspring number per generation for each experimental population and (2) the genotyping results for the regulated population size approach in Experiment 1. The table thus contains frequencies of the TFT (BRO) and the wildtype (DAH) haplotype, the experimental population (vial ID), the biological replicate, the treatment category, Generation, …
				0	1	100_1_8	A	0	1	80
				0	1	100_1_8	A	0	5	66
				0	1	100_1_8	A	0	10	77
				0	1	100_1_9	A	0	1	77
				0	1	100_1_9	A	0	5	81
				0	1	100_1_9	A	0	10	76
				0	1	100_1_10	A	0	1	76
				0	1	100_1_10	A	0	5	73
				0	1	100_1_10	A	0	10	74
				0	1	100_1_11	A	0	1	76
				0	1	100_1_11	A	0	5	80
				0	1	100_1_11	A	0	10	70
				0	1	100_1_12	A	0	1	73
				0	1	100_1_12	A	0	5	80
				0	1	100_1_12	A	0	10	0
				0	1	100_1_13	A	0	1	77
				0	1	100_1_13	A	0	5	74
				0	1	100_1_13	A	0	10	76
				0	1	100_1_14	A	0	1	78
				0	1	100_1_14	A	0	5	70
				0	1	100_1_14	A	0	10	70
				0	1	100_2_8	B	0	1	74
				0	1	100_2_8	B	0	5	72
				0	1	100_2_8	B	0	10	77
				0	1	100_2_9	B	0	1	75
				0	1	100_2_9	B	0	5	70
				0	1	100_2_9	B	0	10	72
				0	1	100_2_10	B	0	1	78
				0	1	100_2_10	B	0	5	71
				0	1	100_2_10	B	0	10	74
				0	1	100_2_11	B	0	1	77
				0	1	100_2_11	B	0	5	71
				0	1	100_2_11	B	0	10	75
				0	1	100_2_12	B	0	1	76
				0	1	100_2_12	B	0	5	80
				0	1	100_2_12	B	0	10	77
				0	1	100_2_13	B	0	1	62
				0	1	100_2_13	B	0	5	65
				0	1	100_2_13	B	0	10	79
				0	1	100_2_14	B	0	1	81
				0	1	100_2_14	B	0	5	71
				0	1	100_2_14	B	0	10	78
				0	1	100_3_8	C	0	1	78
				0	1	100_3_8	C	0	5	79
				0	1	100_3_8	C	0	10	77
				0	1	100_3_9	C	0	1	75
				0	1	100_3_9	C	0	5	76
				0	1	100_3_9	C	0	10	62
				0	1	100_3_10	C	0	1	67
				0	1	100_3_10	C	0	5	76
				0	1	100_3_10	C	0	10	80
				0	1	100_3_11	C	0	1	74
				0	1	100_3_11	C	0	5	76
				0	1	100_3_11	C	0	10	69
				0	1	100_3_12	C	0	1	75
				0	1	100_3_12	C	0	5	79
				0	1	100_3_12	C	0	10	79
				0	1	100_3_13	C	0	1	78
				0	1	100_3_13	C	0	5	78
				0	1	100_3_13	C	0	10	71
				0	1	100_3_14	C	0	1	66
				0	1	100_3_14	C	0	5	80
				0	1	100_3_14	C	0	10	70
				0.285714	0.714286	75_1_8	A	0.25	1	76
				0.285714	0.714286	75_1_8	A	0.25	5	72
				0.142857	0.857143	75_1_8	A	0.25	10	66
				0.285714	0.714286	75_1_9	A	0.25	1	75
				0.142857	0.857143	75_1_9	A	0.25	5	68
				0.285714	0.714286	75_1_9	A	0.25	10	75
				0.142857	0.857143	75_1_10	A	0.25	1	78
				0.142857	0.857143	75_1_10	A	0.25	5	68
				0.142857	0.857143	75_1_10	A	0.25	10	69
				0.428571	0.571429	75_1_11	A	0.25	1	75
				0.142857	0.857143	75_1_11	A	0.25	5	80
				0.285714	0.714286	75_1_11	A	0.25	10	79
				0	1	75_1_12	A	0.25	1	76
				0	1	75_1_12	A	0.25	5	73
				0.142857	0.857143	75_1_12	A	0.25	10	68
				0.428571	0.571429	75_1_13	A	0.25	1	80
				0.285714	0.714286	75_1_13	A	0.25	5	77
				0	1	75_1_13	A	0.25	10	69
				0.285714	0.714286	75_1_14	A	0.25	1	77
				0.142857	0.857143	75_1_14	A	0.25	5	79
				0.142857	0.857143	75_1_14	A	0.25	10	74
				0.285714	0.714286	75_2_8	B	0.25	1	74
				0.142857	0.857143	75_2_8	B	0.25	5	73
				0.142857	0.857143	75_2_8	B	0.25	10	76
				0.285714	0.714286	75_2_9	B	0.25	1	71
				0.142857	0.857143	75_2_9	B	0.25	5	71
				0.285714	0.714286	75_2_9	B	0.25	10	71
				0.142857	0.857143	75_2_10	B	0.25	1	78
				0.142857	0.857143	75_2_10	B	0.25	5	73
				0	1	75_2_10	B	0.25	10	68
				0.142857	0.857143	75_2_11	B	0.25	1	77
				0	1	75_2_11	B	0.25	5	76
				0.285714	0.714286	75_2_11	B	0.25	10	74
				0.285714	0.714286	75_2_12	B	0.25	1	75
				0.285714	0.714286	75_2_12	B	0.25	5	75
				0	1	75_2_12	B	0.25	10	79
				0.285714	0.714286	75_2_13	B	0.25	1	76
				0.142857	0.857143	75_2_13	B	0.25	5	63
				0.142857	0.857143	75_2_13	B	0.25	10	72
				0.428571	0.571429	75_2_14	B	0.25	1	77
				0	1	75_2_14	B	0.25	5	68
				0.285714	0.714286	75_2_14	B	0.25	10	72
				0.142857	0.857143	75_3_8	C	0.25	1	79
				0.142857	0.857143	75_3_8	C	0.25	5	75
				0	1	75_3_8	C	0.25	10	68
				0.142857	0.857143	75_3_9	C	0.25	1	74
				0.428571	0.571429	75_3_9	C	0.25	5	80
				0.285714	0.714286	75_3_9	C	0.25	10	75
				0.285714	0.714286	75_3_10	C	0.25	1	77
				0	1	75_3_10	C	0.25	5	75
				0.142857	0.857143	75_3_10	C	0.25	10	69
				0.285714	0.714286	75_3_11	C	0.25	1	79
				0.142857	0.857143	75_3_11	C	0.25	5	70
				0.142857	0.857143	75_3_11	C	0.25	10	76
				0.428571	0.571429	75_3_12	C	0.25	1	80
				0.285714	0.714286	75_3_12	C	0.25	5	73
				0.142857	0.857143	75_3_12	C	0.25	10	70
				0.285714	0.714286	75_3_13	C	0.25	1	77
				0	1	75_3_13	C	0.25	5	62
				0.142857	0.857143	75_3_13	C	0.25	10	66
				0.142857	0.857143	75_3_14	C	0.25	1	70
				0.142857	0.857143	75_3_14	C	0.25	5	65
				0.428571	0.571429	75_3_14	C	0.25	10	77
				0.285714	0.714286	50_1_8	A	0.5	1	76
				0.571429	0.428571	50_1_8	A	0.5	5	73
				0.571429	0.428571	50_1_8	A	0.5	10	71
				0.428571	0.571429	50_1_9	A	0.5	1	75
				0.714286	0.285714	50_1_9	A	0.5	5	67
				0.714286	0.285714	50_1_9	A	0.5	10	70
				0.571429	0.428571	50_1_10	A	0.5	1	77
				0.714286	0.285714	50_1_10	A	0.5	5	70
				0.857143	0.142857	50_1_10	A	0.5	10	72
				0.285714	0.714286	50_1_11	A	0.5	1	78
				0.857143	0.142857	50_1_11	A	0.5	5	74
				0.714286	0.285714	50_1_11	A	0.5	10	66
				0.571429	0.428571	50_1_12	A	0.5	1	79
				0.571429	0.428571	50_1_12	A	0.5	5	71
				0.571429	0.428571	50_1_12	A	0.5	10	68
				0.428571	0.571429	50_1_13	A	0.5	1	79
				0.428571	0.571429	50_1_13	A	0.5	5	72
				0.857143	0.142857	50_1_13	A	0.5	10	68
				0.571429	0.428571	50_1_14	A	0.5	1	77
				0.571429	0.428571	50_1_14	A	0.5	5	72
				0.714286	0.285714	50_1_14	A	0.5	10	61
				0.571429	0.428571	50_2_8	B	0.5	1	79
				0.428571	0.571429	50_2_8	B	0.5	5	74
				0.857143	0.142857	50_2_8	B	0.5	10	53
				0.285714	0.714286	50_2_9	B	0.5	1	73
				0.714286	0.285714	50_2_9	B	0.5	5	53
				0.714286	0.285714	50_2_9	B	0.5	10	69
				0.571429	0.428571	50_2_10	B	0.5	1	83
				0.714286	0.285714	50_2_10	B	0.5	5	73
				0.571429	0.428571	50_2_10	B	0.5	10	65
				0.285714	0.714286	50_2_11	B	0.5	1	77
				0.571429	0.428571	50_2_11	B	0.5	5	71
				0.714286	0.285714	50_2_11	B	0.5	10	63
				0.571429	0.428571	50_2_12	B	0.5	1	77
				0.857143	0.142857	50_2_12	B	0.5	5	57
				0.714286	0.285714	50_2_12	B	0.5	10	69
				0.285714	0.714286	50_2_13	B	0.5	1	74
				0.714286	0.285714	50_2_13	B	0.5	5	71
				0.428571	0.571429	50_2_13	B	0.5	10	66
				0.428571	0.571429	50_2_14	B	0.5	1	80
				0.428571	0.571429	50_2_14	B	0.5	5	73
				0.714286	0.285714	50_2_14	B	0.5	10	72
				0.571429	0.428571	50_3_8	C	0.5	1	78
				0.571429	0.428571	50_3_8	C	0.5	5	70
				0.571429	0.428571	50_3_8	C	0.5	10	70
				0.428571	0.571429	50_3_9	C	0.5	1	77
				0.714286	0.285714	50_3_9	C	0.5	5	69
				0.857143	0.142857	50_3_9	C	0.5	10	72
				0.571429	0.428571	50_3_10	C	0.5	1	76
				0.571429	0.428571	50_3_10	C	0.5	5	72
				0.714286	0.285714	50_3_10	C	0.5	10	69
				0.285714	0.714286	50_3_11	C	0.5	1	76
				0.714286	0.285714	50_3_11	C	0.5	5	64
				0.714286	0.285714	50_3_11	C	0.5	10	73
				0.571429	0.428571	50_3_12	C	0.5	1	79
				0.571429	0.428571	50_3_12	C	0.5	5	73
				0.571429	0.428571	50_3_12	C	0.5	10	67
				0.428571	0.571429	50_3_13	C	0.5	1	77
				0.714286	0.285714	50_3_13	C	0.5	5	71
				0.428571	0.571429	50_3_13	C	0.5	10	65
				0.285714	0.714286	50_3_14	C	0.5	1	75
				0.428571	0.571429	50_3_14	C	0.5	5	76
				0.571429	0.428571	50_3_14	C	0.5	10	67
				0.714286	0.285714	25_1_8	A	0.75	1	75
				0.714286	0.285714	25_1_8	A	0.75	5	69
				0.714286	0.285714	25_1_8	A	0.75	10	68
				0.571429	0.428571	25_1_9	A	0.75	1	65
				0.571429	0.428571	25_1_9	A	0.75	5	68
				0.857143	0.142857	25_1_9	A	0.75	10	64
				0.571429	0.428571	25_1_10	A	0.75	1	76
				0.714286	0.285714	25_1_10	A	0.75	5	66
				1	0	25_1_10	A	0.75	10	64
				0.571429	0.428571	25_1_11	A	0.75	1	78
				0.714286	0.285714	25_1_11	A	0.75	5	63
				0.714286	0.285714	25_1_11	A	0.75	10	65
				0.714286	0.285714	25_1_12	A	0.75	1	79
				0.714286	0.285714	25_1_12	A	0.75	5	73
				1	0	25_1_12	A	0.75	10	67
				0.428571	0.571429	25_1_13	A	0.75	1	75
				0.571429	0.428571	25_1_13	A	0.75	5	68
				0.714286	0.285714	25_1_13	A	0.75	10	65
				0.571429	0.428571	25_1_14	A	0.75	1	78
				0.857143	0.142857	25_1_14	A	0.75	5	61
				0.857143	0.142857	25_1_14	A	0.75	10	66
				0.571429	0.428571	25_2_8	B	0.75	1	74
				0.571429	0.428571	25_2_8	B	0.75	5	66
				0.714286	0.285714	25_2_8	B	0.75	10	66
				0.857143	0.142857	25_2_9	B	0.75	1	74
				0.571429	0.428571	25_2_9	B	0.75	5	69
				0.714286	0.285714	25_2_9	B	0.75	10	64
				0.714286	0.285714	25_2_10	B	0.75	1	75
				0.714286	0.285714	25_2_10	B	0.75	5	67
				0.857143	0.142857	25_2_10	B	0.75	10	64
				0.571429	0.428571	25_2_11	B	0.75	1	67
				0.714286	0.285714	25_2_11	B	0.75	5	72
				0.714286	0.285714	25_2_11	B	0.75	10	67
				0.714286	0.285714	25_2_12	B	0.75	1	74
				0.857143	0.142857	25_2_12	B	0.75	5	65
				0.857143	0.142857	25_2_12	B	0.75	10	72
				0.714286	0.285714	25_2_13	B	0.75	1	76
				0.714286	0.285714	25_2_13	B	0.75	5	65
				0.571429	0.428571	25_2_13	B	0.75	10	63
				0.428571	0.571429	25_2_14	B	0.75	1	76
				0.714286	0.285714	25_2_14	B	0.75	5	55
				0.857143	0.142857	25_2_14	B	0.75	10	66
				0.714286	0.285714	25_3_8	C	0.75	1	78
				0.714286	0.285714	25_3_8	C	0.75	5	69
				0.857143	0.142857	25_3_8	C	0.75	10	70
				0.428571	0.571429	25_3_9	C	0.75	1	77
				0.714286	0.285714	25_3_9	C	0.75	5	65
				0.857143	0.142857	25_3_9	C	0.75	10	68
				0.714286	0.285714	25_3_10	C	0.75	1	75
				0.571429	0.428571	25_3_10	C	0.75	5	70
				0.714286	0.285714	25_3_10	C	0.75	10	66
				0.714286	0.285714	25_3_11	C	0.75	1	79
				0.857143	0.142857	25_3_11	C	0.75	5	72
				0.857143	0.142857	25_3_11	C	0.75	10	62
				0.571429	0.428571	25_3_12	C	0.75	1	74
				0.571429	0.428571	25_3_12	C	0.75	5	80
				0.714286	0.285714	25_3_12	C	0.75	10	76
				0.428571	0.571429	25_3_13	C	0.75	1	79
				0.857143	0.142857	25_3_13	C	0.75	5	66
				0.714286	0.285714	25_3_13	C	0.75	10	66
				0.857143	0.142857	25_3_14	C	0.75	1	79
				0.857143	0.142857	25_3_14	C	0.75	5	72
				1	0	25_3_14	C	0.75	10	65

## Sheet: Offspring + TFTfreq fluctuating
				BRO	DAH	Experimental population	Biological Replicate	Treatment	Generation	Offspring
This data sheet contains the combined raw data for (1) offspring number per generation for each experimental population and (2) the genotyping results for the fluctuating population size approach in Experiment 2. The table thus contains frequencies of the TFT (BRO) and the wildtype (DAH) haplotype, the experimental population (vial ID), the biological replicate, the treatment category, Generation…				0	1	100_1_1	A	0	10	77
				0	1	100_1_2	A	0	10	80
				0	1	100_1_3	A	0	10	44
				0	1	100_1_4	A	0	10	108
				0	1	100_1_5	A	0	10	88
				0	1	100_1_6	A	0	10	0
				0	1	100_1_7	A	0	10	55
				0	1	100_2_1	B	0	10	128
				0	1	100_2_2	B	0	10	73
				0	1	100_2_3	B	0	10	103
				0	1	100_2_4	B	0	10	67
				0	1	100_2_5	B	0	10	57
				0	1	100_2_6	B	0	10	97
				0	1	100_2_7	B	0	10	72
				0	1	100_3_1	C	0	10	68
				0	1	100_3_2	C	0	10	86
				0	1	100_3_3	C	0	10	0
				0	1	100_3_4	C	0	10	70
				0	1	100_3_5	C	0	10	110
				0	1	100_3_6	C	0	10	51
				0	1	100_3_7	C	0	10	95
				0.22	0.78	75_1_1	A	0.25	10	75
				0.11	0.89	75_1_2	A	0.25	10	80
				0.22	0.78	75_1_3	A	0.25	10	71
				0.44	0.56	75_1_4	A	0.25	10	80
				0.33	0.67	75_1_5	A	0.25	10	82
				0.33	0.67	75_1_6	A	0.25	10	60
				0.78	0.22	75_1_7	A	0.25	10	67
				0.11	0.89	75_2_1	B	0.25	10	68
				0	1	75_2_2	B	0.25	10	110
				0.22	0.78	75_2_3	B	0.25	10	47
				0.33	0.67	75_2_4	B	0.25	10	88
				0.67	0.33	75_2_5	B	0.25	10	77
				0	1	75_2_6	B	0.25	10	79
				1	0	75_2_7	B	0.25	10	100
				0	1	75_3_1	C	0.25	10	110
				0.56	0.44	75_3_2	C	0.25	10	83
				0.11	0.89	75_3_3	C	0.25	10	88
				0.44	0.56	75_3_4	C	0.25	10	58
				0	1	75_3_5	C	0.25	10	79
				0.78	0.22	75_3_6	C	0.25	10	105
				0.67	0.33	75_3_7	C	0.25	10	139
				0.33	0.67	50_1_1	A	0.5	10	88
				0.33	0.67	50_1_3	A	0.5	10	67
				0.67	0.33	50_1_4	A	0.5	10	52
				0	1	50_1_5	A	0.5	10	121
				0.67	0.33	50_1_6	A	0.5	10	78
				0.44	0.56	50_1_7	A	0.5	10	101
				0.33	0.67	50_2_1	B	0.5	10	65
				0.33	0.67	50_2_3	B	0.5	10	142
				1	0	50_2_4	B	0.5	10	54
				0.78	0.22	50_2_5	B	0.5	10	55
				0.56	0.44	50_2_6	B	0.5	10	97
				1	0	50_2_7	B	0.5	10	67
				0.56	0.44	50_3_1	C	0.5	10	96
				0.44	0.56	50_3_2	C	0.5	10	77
				0.67	0.33	50_3_3	C	0.5	10	70
				0.33	0.67	50_3_4	C	0.5	10	71
				0.67	0.33	50_3_5	C	0.5	10	60
				1	0	50_3_6	C	0.5	10	69
				1	0	50_3_7	C	0.5	10	62
				0.33	0.67	25_1_1	A	0.75	10	99
				1	0	25_1_2	A	0.75	10	114
				0.89	0.11	25_1_3	A	0.75	10	66
				0.89	0.11	25_1_4	A	0.75	10	69
				0.33	0.67	25_1_5	A	0.75	10	66
				0.89	0.11	25_1_6	A	0.75	10	94
				0.89	0.11	25_1_7	A	0.75	10	100
				0.67	0.33	25_2_1	B	0.75	10	104
				1	0	25_2_2	B	0.75	10	69
				0.78	0.22	25_2_3	B	0.75	10	82
				0.56	0.44	25_2_4	B	0.75	10	121
				0.67	0.33	25_2_5	B	0.75	10	85
				0.78	0.22	25_2_6	B	0.75	10	87
				0.56	0.44	25_2_7	B	0.75	10	95
				1	0	25_3_1	C	0.75	10	84
				0.44	0.56	25_3_2	C	0.75	10	75
				0.89	0.11	25_3_3	C	0.75	10	78
				1	0	25_3_4	C	0.75	10	92
				0.89	0.11	25_3_5	C	0.75	10	93
				0.89	0.11	25_3_6	C	0.75	10	80
				0.33	0.67	25_3_7	C	0.75	10	50
