# Supplementary material for: Introduction of a male-harming mitochondrial haplotype via ‘Trojan Females’ achieves population suppression in fruit flies
Source: eLife journal article supplement (doi:10.7554/elife.23551), 2017-05-03
Supplement: supp [file elife_poa_e23551_Figure_4_Source_data.xls]

## Sheet: Offspring count Fluctuating
This data sheet contains the raw data for offspring number per generation for each experimental population for the fluctuating population size aproach in Experiment 2. Each generation offspring were transferred into new vials for ovipositioning until 50% of all vials contained app. 80 eggs upon which ovipositioning was stopped. Each table represents one of four distinct ratios of fly pairs (one m…			0% TFT								25% TFT								50% TFT								75% TFT
			Number of offspring	Experimental population	Biological Replicate	Starting Proportion		Generation	Number of females genotyped		Number of offspring	Vial ID	Experimental population	Starting Proportion		Generation	Number of females genotyped		Number of offspring	Experimental population	Biological Replicate	Starting Proportion		Generation	Number of females genotyped		Number of offspring	Experimental population	Biological Replicate	Starting Proportion		Generation	Number of females genotyped
						TFT (BRO)	DAH							TFT (BRO)	DAH							TFT (BRO)	DAH							TFT (BRO)	DAH
			49	100_1_1	A	0	1	1	-		88	75_1_1	A	0.25	0.75	1	-		52	50_1_1	A	0.5	0.5	1	-		80	25_1_1	A	0.75	0.25	1	-
			70	100_1_1	A	0	1	2	-		85	75_1_1	A	0.25	0.75	2	-		73	50_1_1	A	0.5	0.5	2	-		76	25_1_1	A	0.75	0.25	2	-
			92	100_1_1	A	0	1	3	-		93	75_1_1	A	0.25	0.75	3	-		62	50_1_1	A	0.5	0.5	3	-		80	25_1_1	A	0.75	0.25	3	-
			61	100_1_1	A	0	1	4	-		74	75_1_1	A	0.25	0.75	4	-		77	50_1_1	A	0.5	0.5	4	-		78	25_1_1	A	0.75	0.25	4	-
			74	100_1_1	A	0	1	5	-		65	75_1_1	A	0.25	0.75	5	-		64	50_1_1	A	0.5	0.5	5	-		52	25_1_1	A	0.75	0.25	5	-
			86	100_1_1	A	0	1	6	-		63	75_1_1	A	0.25	0.75	6	-		57	50_1_1	A	0.5	0.5	6	-		61	25_1_1	A	0.75	0.25	6	-
			93	100_1_1	A	0	1	7	-		99	75_1_1	A	0.25	0.75	7	-		44	50_1_1	A	0.5	0.5	7	-		88	25_1_1	A	0.75	0.25	7	-
			66	100_1_1	A	0	1	8	-		78	75_1_1	A	0.25	0.75	8	-		40	50_1_1	A	0.5	0.5	8	-		105	25_1_1	A	0.75	0.25	8	-
			66	100_1_1	A	0	1	9	-		88	75_1_1	A	0.25	0.75	9	-		115	50_1_1	A	0.5	0.5	9	-		31	25_1_1	A	0.75	0.25	9	-
			77	100_1_1	A	0	1	10	-		75	75_1_1	A	0.25	0.75	10	9		88	50_1_1	A	0.5	0.5	10	9		99	25_1_1	A	0.75	0.25	10	9
			65	100_1_2	A	0	1	1	-		107	75_1_2	A	0.25	0.75	1	-		62	50_1_2	A	0.5	0.5	1	-		89	25_1_2	A	0.75	0.25	1	-
			88	100_1_2	A	0	1	2	-		87	75_1_2	A	0.25	0.75	2	-		41	50_1_2	A	0.5	0.5	2	-		90	25_1_2	A	0.75	0.25	2	-
			102	100_1_2	A	0	1	3	-		106	75_1_2	A	0.25	0.75	3	-		15	50_1_2	A	0.5	0.5	3	-		72	25_1_2	A	0.75	0.25	3	-
			74	100_1_2	A	0	1	4	-		79	75_1_2	A	0.25	0.75	4	-		2	50_1_2	A	0.5	0.5	4	-		86	25_1_2	A	0.75	0.25	4	-
			70	100_1_2	A	0	1	5	-		52	75_1_2	A	0.25	0.75	5	-		0	50_1_2	A	0.5	0.5	5	-		69	25_1_2	A	0.75	0.25	5	-
			102	100_1_2	A	0	1	6	-		79	75_1_2	A	0.25	0.75	6	-		0	50_1_2	A	0.5	0.5	6	-		90	25_1_2	A	0.75	0.25	6	-
			92	100_1_2	A	0	1	7	-		109	75_1_2	A	0.25	0.75	7	-		0	50_1_2	A	0.5	0.5	7	-		96	25_1_2	A	0.75	0.25	7	-
			85	100_1_2	A	0	1	8	-		66	75_1_2	A	0.25	0.75	8	-		0	50_1_2	A	0.5	0.5	8	-		109	25_1_2	A	0.75	0.25	8	-
			42	100_1_2	A	0	1	9	-		67	75_1_2	A	0.25	0.75	9	-		0	50_1_2	A	0.5	0.5	9	-		74	25_1_2	A	0.75	0.25	9	-
			80	100_1_2	A	0	1	10	-		80	75_1_2	A	0.25	0.75	10	9		0	50_1_2	A	0.5	0.5	10	9		114	25_1_2	A	0.75	0.25	10	9
			108	100_1_3	A	0	1	1	-		110	75_1_3	A	0.25	0.75	1	-		60	50_1_3	A	0.5	0.5	1	-		50	25_1_3	A	0.75	0.25	1	-
			86	100_1_3	A	0	1	2	-		71	75_1_3	A	0.25	0.75	2	-		91	50_1_3	A	0.5	0.5	2	-		49	25_1_3	A	0.75	0.25	2	-
			68	100_1_3	A	0	1	3	-		69	75_1_3	A	0.25	0.75	3	-		64	50_1_3	A	0.5	0.5	3	-		57	25_1_3	A	0.75	0.25	3	-
			45	100_1_3	A	0	1	4	-		50	75_1_3	A	0.25	0.75	4	-		61	50_1_3	A	0.5	0.5	4	-		76	25_1_3	A	0.75	0.25	4	-
			80	100_1_3	A	0	1	5	-		76	75_1_3	A	0.25	0.75	5	-		88	50_1_3	A	0.5	0.5	5	-		58	25_1_3	A	0.75	0.25	5	-
			71	100_1_3	A	0	1	6	-		68	75_1_3	A	0.25	0.75	6	-		64	50_1_3	A	0.5	0.5	6	-		53	25_1_3	A	0.75	0.25	6	-
			77	100_1_3	A	0	1	7	-		65	75_1_3	A	0.25	0.75	7	-		66	50_1_3	A	0.5	0.5	7	-		49	25_1_3	A	0.75	0.25	7	-
			95	100_1_3	A	0	1	8	-		50	75_1_3	A	0.25	0.75	8	-		53	50_1_3	A	0.5	0.5	8	-		70	25_1_3	A	0.75	0.25	8	-
			63	100_1_3	A	0	1	9	-		62	75_1_3	A	0.25	0.75	9	-		40	50_1_3	A	0.5	0.5	9	-		51	25_1_3	A	0.75	0.25	9	-
			44	100_1_3	A	0	1	10	-		71	75_1_3	A	0.25	0.75	10	9		67	50_1_3	A	0.5	0.5	10	9		66	25_1_3	A	0.75	0.25	10	9
			79	100_1_4	A	0	1	1	-		102	75_1_4	A	0.25	0.75	1	-		68	50_1_4	A	0.5	0.5	1	-		96	25_1_4	A	0.75	0.25	1	-
			97	100_1_4	A	0	1	2	-		58	75_1_4	A	0.25	0.75	2	-		86	50_1_4	A	0.5	0.5	2	-		86	25_1_4	A	0.75	0.25	2	-
			73	100_1_4	A	0	1	3	-		78	75_1_4	A	0.25	0.75	3	-		84	50_1_4	A	0.5	0.5	3	-		64	25_1_4	A	0.75	0.25	3	-
			89	100_1_4	A	0	1	4	-		48	75_1_4	A	0.25	0.75	4	-		89	50_1_4	A	0.5	0.5	4	-		71	25_1_4	A	0.75	0.25	4	-
			58	100_1_4	A	0	1	5	-		74	75_1_4	A	0.25	0.75	5	-		57	50_1_4	A	0.5	0.5	5	-		66	25_1_4	A	0.75	0.25	5	-
			42	100_1_4	A	0	1	6	-		97	75_1_4	A	0.25	0.75	6	-		-	50_1_4	A	0.5	0.5	6	-		80	25_1_4	A	0.75	0.25	6	-
			71	100_1_4	A	0	1	7	-		85	75_1_4	A	0.25	0.75	7	-		75	50_1_4	A	0.5	0.5	7	-		78	25_1_4	A	0.75	0.25	7	-
			48	100_1_4	A	0	1	8	-		74	75_1_4	A	0.25	0.75	8	-		62	50_1_4	A	0.5	0.5	8	-		51	25_1_4	A	0.75	0.25	8	-
			115	100_1_4	A	0	1	9	-		46	75_1_4	A	0.25	0.75	9	-		74	50_1_4	A	0.5	0.5	9	-		105	25_1_4	A	0.75	0.25	9	-
			108	100_1_4	A	0	1	10	-		80	75_1_4	A	0.25	0.75	10	9		52	50_1_4	A	0.5	0.5	10	9		69	25_1_4	A	0.75	0.25	10	9
			111	100_1_5	A	0	1	1	-		92	75_1_5	A	0.25	0.75	1	-		82	50_1_5	A	0.5	0.5	1	-		55	25_1_5	A	0.75	0.25	1	-
			66	100_1_5	A	0	1	2	-		81	75_1_5	A	0.25	0.75	2	-		86	50_1_5	A	0.5	0.5	2	-		61	25_1_5	A	0.75	0.25	2	-
			71	100_1_5	A	0	1	3	-		59	75_1_5	A	0.25	0.75	3	-		39	50_1_5	A	0.5	0.5	3	-		63	25_1_5	A	0.75	0.25	3	-
			79	100_1_5	A	0	1	4	-		67	75_1_5	A	0.25	0.75	4	-		35	50_1_5	A	0.5	0.5	4	-		70	25_1_5	A	0.75	0.25	4	-
			66	100_1_5	A	0	1	5	-		69	75_1_5	A	0.25	0.75	5	-		45	50_1_5	A	0.5	0.5	5	-		55	25_1_5	A	0.75	0.25	5	-
			87	100_1_5	A	0	1	6	-		98	75_1_5	A	0.25	0.75	6	-		91	50_1_5	A	0.5	0.5	6	-		110	25_1_5	A	0.75	0.25	6	-
			66	100_1_5	A	0	1	7	-		134	75_1_5	A	0.25	0.75	7	-		113	50_1_5	A	0.5	0.5	7	-		102	25_1_5	A	0.75	0.25	7	-
			57	100_1_5	A	0	1	8	-		86	75_1_5	A	0.25	0.75	8	-		105	50_1_5	A	0.5	0.5	8	-		85	25_1_5	A	0.75	0.25	8	-
			129	100_1_5	A	0	1	9	-		80	75_1_5	A	0.25	0.75	9	-		58	50_1_5	A	0.5	0.5	9	-		86	25_1_5	A	0.75	0.25	9	-
			88	100_1_5	A	0	1	10	-		82	75_1_5	A	0.25	0.75	10	9		121	50_1_5	A	0.5	0.5	10	9		66	25_1_5	A	0.75	0.25	10	9
			110	100_1_6	A	0	1	1	-		71	75_1_6	A	0.25	0.75	1	-		70	50_1_6	A	0.5	0.5	1	-		55	25_1_6	A	0.75	0.25	1	-
			86	100_1_6	A	0	1	2	-		97	75_1_6	A	0.25	0.75	2	-		53	50_1_6	A	0.5	0.5	2	-		65	25_1_6	A	0.75	0.25	2	-
			103	100_1_6	A	0	1	3	-		85	75_1_6	A	0.25	0.75	3	-		93	50_1_6	A	0.5	0.5	3	-		76	25_1_6	A	0.75	0.25	3	-
			67	100_1_6	A	0	1	4	-		76	75_1_6	A	0.25	0.75	4	-		72	50_1_6	A	0.5	0.5	4	-		68	25_1_6	A	0.75	0.25	4	-
			41	100_1_6	A	0	1	5	-		75	75_1_6	A	0.25	0.75	5	-		67	50_1_6	A	0.5	0.5	5	-		89	25_1_6	A	0.75	0.25	5	-
			2	100_1_6	A	0	1	6	-		59	75_1_6	A	0.25	0.75	6	-		120	50_1_6	A	0.5	0.5	6	-		80	25_1_6	A	0.75	0.25	6	-
			0	100_1_6	A	0	1	7	-		71	75_1_6	A	0.25	0.75	7	-		66	50_1_6	A	0.5	0.5	7	-		91	25_1_6	A	0.75	0.25	7	-
			0	100_1_6	A	0	1	8	-		58	75_1_6	A	0.25	0.75	8	-		41	50_1_6	A	0.5	0.5	8	-		86	25_1_6	A	0.75	0.25	8	-
			0	100_1_6	A	0	1	9	-		99	75_1_6	A	0.25	0.75	9	-		75	50_1_6	A	0.5	0.5	9	-		63	25_1_6	A	0.75	0.25	9	-
			0	100_1_6	A	0	1	10	-		60	75_1_6	A	0.25	0.75	10	9		78	50_1_6	A	0.5	0.5	10	9		94	25_1_6	A	0.75	0.25	10	9
			94	100_1_7	A	0	1	1	-		96	75_1_7	A	0.25	0.75	1	-		81	50_1_7	A	0.5	0.5	1	-		95	25_1_7	A	0.75	0.25	1	-
			80	100_1_7	A	0	1	2	-		86	75_1_7	A	0.25	0.75	2	-		57	50_1_7	A	0.5	0.5	2	-		70	25_1_7	A	0.75	0.25	2	-
			77	100_1_7	A	0	1	3	-		85	75_1_7	A	0.25	0.75	3	-		86	50_1_7	A	0.5	0.5	3	-		73	25_1_7	A	0.75	0.25	3	-
			61	100_1_7	A	0	1	4	-		69	75_1_7	A	0.25	0.75	4	-		92	50_1_7	A	0.5	0.5	4	-		101	25_1_7	A	0.75	0.25	4	-
			55	100_1_7	A	0	1	5	-		84	75_1_7	A	0.25	0.75	5	-		105	50_1_7	A	0.5	0.5	5	-		98	25_1_7	A	0.75	0.25	5	-
			74	100_1_7	A	0	1	6	-		86	75_1_7	A	0.25	0.75	6	-		89	50_1_7	A	0.5	0.5	6	-		116	25_1_7	A	0.75	0.25	6	-
			109	100_1_7	A	0	1	7	-		104	75_1_7	A	0.25	0.75	7	-		93	50_1_7	A	0.5	0.5	7	-		109	25_1_7	A	0.75	0.25	7	-
			82	100_1_7	A	0	1	8	-		57	75_1_7	A	0.25	0.75	8	-		93	50_1_7	A	0.5	0.5	8	-		94	25_1_7	A	0.75	0.25	8	-
			75	100_1_7	A	0	1	9	-		125	75_1_7	A	0.25	0.75	9	-		70	50_1_7	A	0.5	0.5	9	-		73	25_1_7	A	0.75	0.25	9	-
			55	100_1_7	B	0	1	10	-		67	75_1_7	B	0.25	0.75	10	9		101	50_1_7	B	0.5	0.5	10	9		100	25_1_7	B	0.75	0.25	10	9
			67	100_2_1	B	0	1	1	-		60	75_2_1	B	0.25	0.75	1	-		75	50_2_1	B	0.5	0.5	1	-		87	25_2_1	B	0.75	0.25	1	-
			94	100_2_1	B	0	1	2	-		77	75_2_1	B	0.25	0.75	2	-		61	50_2_1	B	0.5	0.5	2	-		71	25_2_1	B	0.75	0.25	2	-
			58	100_2_1	B	0	1	3	-		95	75_2_1	B	0.25	0.75	3	-		95	50_2_1	B	0.5	0.5	3	-		122	25_2_1	B	0.75	0.25	3	-
			46	100_2_1	B	0	1	4	-		69	75_2_1	B	0.25	0.75	4	-		66	50_2_1	B	0.5	0.5	4	-		92	25_2_1	B	0.75	0.25	4	-
			40	100_2_1	B	0	1	5	-		43	75_2_1	B	0.25	0.75	5	-		85	50_2_1	B	0.5	0.5	5	-		81	25_2_1	B	0.75	0.25	5	-
			81	100_2_1	B	0	1	6	-		22	75_2_1	B	0.25	0.75	6	-		97	50_2_1	B	0.5	0.5	6	-		93	25_2_1	B	0.75	0.25	6	-
			72	100_2_1	B	0	1	7	-		42	75_2_1	B	0.25	0.75	7	-		99	50_2_1	B	0.5	0.5	7	-		82	25_2_1	B	0.75	0.25	7	-
			87	100_2_1	B	0	1	8	-		90	75_2_1	B	0.25	0.75	8	-		82	50_2_1	B	0.5	0.5	8	-		51	25_2_1	B	0.75	0.25	8	-
			87	100_2_1	B	0	1	9	-		109	75_2_1	B	0.25	0.75	9	-		180	50_2_1	B	0.5	0.5	9	-		61	25_2_1	B	0.75	0.25	9	-
			128	100_2_1	B	0	1	10	-		68	75_2_1	B	0.25	0.75	10	9		65	50_2_1	B	0.5	0.5	10	9		104	25_2_1	B	0.75	0.25	10	9
			58	100_2_2	B	0	1	1	-		94	75_2_2	B	0.25	0.75	1	-		84	50_2_2	B	0.5	0.5	1	-		56	25_2_2	B	0.75	0.25	1	-
			81	100_2_2	B	0	1	2	-		93	75_2_2	B	0.25	0.75	2	-		64	50_2_2	B	0.5	0.5	2	-		55	25_2_2	B	0.75	0.25	2	-
			98	100_2_2	B	0	1	3	-		99	75_2_2	B	0.25	0.75	3	-		69	50_2_2	B	0.5	0.5	3	-		65	25_2_2	B	0.75	0.25	3	-
			45	100_2_2	B	0	1	4	-		71	75_2_2	B	0.25	0.75	4	-		58	50_2_2	B	0.5	0.5	4	-		68	25_2_2	B	0.75	0.25	4	-
			51	100_2_2	B	0	1	5	-		91	75_2_2	B	0.25	0.75	5	-		32	50_2_2	B	0.5	0.5	5	-		58	25_2_2	B	0.75	0.25	5	-
			76	100_2_2	B	0	1	6	-		85	75_2_2	B	0.25	0.75	6	-		3	50_2_2	B	0.5	0.5	6	-		65	25_2_2	B	0.75	0.25	6	-
			77	100_2_2	B	0	1	7	-		137	75_2_2	B	0.25	0.75	7	-		0	50_2_2	B	0.5	0.5	7	-		67	25_2_2	B	0.75	0.25	7	-
			86	100_2_2	B	0	1	8	-		80	75_2_2	B	0.25	0.75	8	-		0	50_2_2	B	0.5	0.5	8	-		61	25_2_2	B	0.75	0.25	8	-
			112	100_2_2	B	0	1	9	-		52	75_2_2	B	0.25	0.75	9	-		0	50_2_2	B	0.5	0.5	9	-		81	25_2_2	B	0.75	0.25	9	-
			73	100_2_2	B	0	1	10	-		110	75_2_2	B	0.25	0.75	10	9		0	50_2_2	B	0.5	0.5	10	9		69	25_2_2	B	0.75	0.25	10	9
			99	100_2_3	B	0	1	1	-		105	75_2_3	B	0.25	0.75	1	-		80	50_2_3	B	0.5	0.5	1	-		91	25_2_3	B	0.75	0.25	1	-
			76	100_2_3	B	0	1	2	-		74	75_2_3	B	0.25	0.75	2	-		29	50_2_3	B	0.5	0.5	2	-		37	25_2_3	B	0.75	0.25	2	-
			69	100_2_3	B	0	1	3	-		76	75_2_3	B	0.25	0.75	3	-		61	50_2_3	B	0.5	0.5	3	-		70	25_2_3	B	0.75	0.25	3	-
			56	100_2_3	B	0	1	4	-		72	75_2_3	B	0.25	0.75	4	-		51	50_2_3	B	0.5	0.5	4	-		89	25_2_3	B	0.75	0.25	4	-
			80	100_2_3	B	0	1	5	-		65	75_2_3	B	0.25	0.75	5	-		67	50_2_3	B	0.5	0.5	5	-		92	25_2_3	B	0.75	0.25	5	-
			89	100_2_3	B	0	1	6	-		55	75_2_3	B	0.25	0.75	6	-		80	50_2_3	B	0.5	0.5	6	-		100	25_2_3	B	0.75	0.25	6	-
			91	100_2_3	B	0	1	7	-		60	75_2_3	B	0.25	0.75	7	-		109	50_2_3	B	0.5	0.5	7	-		95	25_2_3	B	0.75	0.25	7	-
			46	100_2_3	B	0	1	8	-		62	75_2_3	B	0.25	0.75	8	-		66	50_2_3	B	0.5	0.5	8	-		73	25_2_3	B	0.75	0.25	8	-
			89	100_2_3	B	0	1	9	-		93	75_2_3	B	0.25	0.75	9	-		91	50_2_3	B	0.5	0.5	9	-		51	25_2_3	B	0.75	0.25	9	-
			103	100_2_3	B	0	1	10	-		47	75_2_3	B	0.25	0.75	10	9		142	50_2_3	B	0.5	0.5	10	9		82	25_2_3	B	0.75	0.25	10	9
			43	100_2_4	B	0	1	1	-		88	75_2_4	B	0.25	0.75	1	-		107	50_2_4	B	0.5	0.5	1	-		105	25_2_4	B	0.75	0.25	1	-
			50	100_2_4	B	0	1	2	-		55	75_2_4	B	0.25	0.75	2	-		24	50_2_4	B	0.5	0.5	2	-		68	25_2_4	B	0.75	0.25	2	-
			89	100_2_4	B	0	1	3	-		81	75_2_4	B	0.25	0.75	3	-		42	50_2_4	B	0.5	0.5	3	-		81	25_2_4	B	0.75	0.25	3	-
			64	100_2_4	B	0	1	4	-		75	75_2_4	B	0.25	0.75	4	-		46	50_2_4	B	0.5	0.5	4	-		68	25_2_4	B	0.75	0.25	4	-
			78	100_2_4	B	0	1	5	-		70	75_2_4	B	0.25	0.75	5	-		49	50_2_4	B	0.5	0.5	5	-		76	25_2_4	B	0.75	0.25	5	-
			86	100_2_4	B	0	1	6	-		67	75_2_4	B	0.25	0.75	6	-		87	50_2_4	B	0.5	0.5	6	-		87	25_2_4	B	0.75	0.25	6	-
			66	100_2_4	B	0	1	7	-		88	75_2_4	B	0.25	0.75	7	-		125	50_2_4	B	0.5	0.5	7	-		91	25_2_4	B	0.75	0.25	7	-
			98	100_2_4	B	0	1	8	-		67	75_2_4	B	0.25	0.75	8	-		119	50_2_4	B	0.5	0.5	8	-		83	25_2_4	B	0.75	0.25	8	-
			105	100_2_4	B	0	1	9	-		95	75_2_4	B	0.25	0.75	9	-		106	50_2_4	B	0.5	0.5	9	-		102	25_2_4	B	0.75	0.25	9	-
			67	100_2_4	B	0	1	10	-		88	75_2_4	B	0.25	0.75	10	9		54	50_2_4	B	0.5	0.5	10	9		121	25_2_4	B	0.75	0.25	10	9
			94	100_2_5	B	0	1	1	-		93	75_2_5	B	0.25	0.75	1	-		52	50_2_5	B	0.5	0.5	1	-		101	25_2_5	B	0.75	0.25	1	-
			64	100_2_5	B	0	1	2	-		87	75_2_5	B	0.25	0.75	2	-		109	50_2_5	B	0.5	0.5	2	-		93	25_2_5	B	0.75	0.25	2	-
			94	100_2_5	B	0	1	3	-		61	75_2_5	B	0.25	0.75	3	-		95	50_2_5	B	0.5	0.5	3	-		94	25_2_5	B	0.75	0.25	3	-
			59	100_2_5	B	0	1	4	-		64	75_2_5	B	0.25	0.75	4	-		76	50_2_5	B	0.5	0.5	4	-		91	25_2_5	B	0.75	0.25	4	-
			88	100_2_5	B	0	1	5	-		70	75_2_5	B	0.25	0.75	5	-		97	50_2_5	B	0.5	0.5	5	-		96	25_2_5	B	0.75	0.25	5	-
			124	100_2_5	B	0	1	6	-		65	75_2_5	B	0.25	0.75	6	-		87	50_2_5	B	0.5	0.5	6	-		110	25_2_5	B	0.75	0.25	6	-
			117	100_2_5	B	0	1	7	-		85	75_2_5	B	0.25	0.75	7	-		78	50_2_5	B	0.5	0.5	7	-		85	25_2_5	B	0.75	0.25	7	-
			115	100_2_5	B	0	1	8	-		59	75_2_5	B	0.25	0.75	8	-		68	50_2_5	B	0.5	0.5	8	-		76	25_2_5	B	0.75	0.25	8	-
			115	100_2_5	B	0	1	9	-		61	75_2_5	B	0.25	0.75	9	-		87	50_2_5	B	0.5	0.5	9	-		93	25_2_5	B	0.75	0.25	9	-
			57	100_2_5	B	0	1	10	-		77	75_2_5	B	0.25	0.75	10	9		55	50_2_5	B	0.5	0.5	10	9		85	25_2_5	B	0.75	0.25	10	9
			66	100_2_6	B	0	1	1	-		102	75_2_6	B	0.25	0.75	1	-		115	50_2_6	B	0.5	0.5	1	-		118	25_2_6	B	0.75	0.25	1	-
			83	100_2_6	B	0	1	2	-		55	75_2_6	B	0.25	0.75	2	-		38	50_2_6	B	0.5	0.5	2	-		69	25_2_6	B	0.75	0.25	2	-
			79	100_2_6	B	0	1	3	-		72	75_2_6	B	0.25	0.75	3	-		68	50_2_6	B	0.5	0.5	3	-		112	25_2_6	B	0.75	0.25	3	-
			75	100_2_6	B	0	1	4	-		66	75_2_6	B	0.25	0.75	4	-		46	50_2_6	B	0.5	0.5	4	-		83	25_2_6	B	0.75	0.25	4	-
			83	100_2_6	B	0	1	5	-		78	75_2_6	B	0.25	0.75	5	-		84	50_2_6	B	0.5	0.5	5	-		100	25_2_6	B	0.75	0.25	5	-
			71	100_2_6	B	0	1	6	-		60	75_2_6	B	0.25	0.75	6	-		85	50_2_6	B	0.5	0.5	6	-		114	25_2_6	B	0.75	0.25	6	-
			56	100_2_6	B	0	1	7	-		36	75_2_6	B	0.25	0.75	7	-		92	50_2_6	B	0.5	0.5	7	-		102	25_2_6	B	0.75	0.25	7	-
			47	100_2_6	B	0	1	8	-		34	75_2_6	B	0.25	0.75	8	-		80	50_2_6	B	0.5	0.5	8	-		126	25_2_6	B	0.75	0.25	8	-
			107	100_2_6	B	0	1	9	-		49	75_2_6	B	0.25	0.75	9	-		72	50_2_6	B	0.5	0.5	9	-		110	25_2_6	B	0.75	0.25	9	-
			97	100_2_6	B	0	1	10	-		79	75_2_6	B	0.25	0.75	10	9		97	50_2_6	B	0.5	0.5	10	9		87	25_2_6	B	0.75	0.25	10	9
			89	100_2_7	B	0	1	1	-		95	75_2_7	B	0.25	0.75	1	-		98	50_2_7	B	0.5	0.5	1	-		95	25_2_7	B	0.75	0.25	1	-
			80	100_2_7	B	0	1	2	-		63	75_2_7	B	0.25	0.75	2	-		89	50_2_7	B	0.5	0.5	2	-		34	25_2_7	B	0.75	0.25	2	-
			94	100_2_7	B	0	1	3	-		85	75_2_7	B	0.25	0.75	3	-		59	50_2_7	B	0.5	0.5	3	-		45	25_2_7	B	0.75	0.25	3	-
			83	100_2_7	B	0	1	4	-		64	75_2_7	B	0.25	0.75	4	-		44	50_2_7	B	0.5	0.5	4	-		61	25_2_7	B	0.75	0.25	4	-
			100	100_2_7	B	0	1	5	-		115	75_2_7	B	0.25	0.75	5	-		55	50_2_7	B	0.5	0.5	5	-		68	25_2_7	B	0.75	0.25	5	-
			96	100_2_7	B	0	1	6	-		108	75_2_7	B	0.25	0.75	6	-		39	50_2_7	B	0.5	0.5	6	-		95	25_2_7	B	0.75	0.25	6	-
			84	100_2_7	B	0	1	7	-		131	75_2_7	B	0.25	0.75	7	-		40	50_2_7	B	0.5	0.5	7	-		100	25_2_7	B	0.75	0.25	7	-
			66	100_2_7	B	0	1	8	-		100	75_2_7	B	0.25	0.75	8	-		54	50_2_7	B	0.5	0.5	8	-		82	25_2_7	B	0.75	0.25	8	-
			61	100_2_7	B	0	1	9	-		71	75_2_7	B	0.25	0.75	9	-		114	50_2_7	B	0.5	0.5	9	-		118	25_2_7	B	0.75	0.25	9	-
			72	100_2_7	B	0	1	10	-		59	75_2_7	B	0.25	0.75	10	9		67	50_2_7	B	0.5	0.5	10	9		95	25_2_7	B	0.75	0.25	10	9
			64	100_3_1	C	0	1	1	-		84	75_3_1	C	0.25	0.75	1	-		44	50_3_1	C	0.5	0.5	1	-		83	25_3_1	C	0.75	0.25	1	-
			66	100_3_1	C	0	1	2	-		80	75_3_1	C	0.25	0.75	2	-		58	50_3_1	C	0.5	0.5	2	-		77	25_3_1	C	0.75	0.25	2	-
			77	100_3_1	C	0	1	3	-		109	75_3_1	C	0.25	0.75	3	-		67	50_3_1	C	0.5	0.5	3	-		98	25_3_1	C	0.75	0.25	3	-
			58	100_3_1	C	0	1	4	-		72	75_3_1	C	0.25	0.75	4	-		79	50_3_1	C	0.5	0.5	4	-		83	25_3_1	C	0.75	0.25	4	-
			48	100_3_1	C	0	1	5	-		74	75_3_1	C	0.25	0.75	5	-		77	50_3_1	C	0.5	0.5	5	-		85	25_3_1	C	0.75	0.25	5	-
			67	100_3_1	C	0	1	6	-		127	75_3_1	C	0.25	0.75	6	-		102	50_3_1	C	0.5	0.5	6	-		46	25_3_1	C	0.75	0.25	6	-
			81	100_3_1	C	0	1	7	-		121	75_3_1	C	0.25	0.75	7	-		105	50_3_1	C	0.5	0.5	7	-		79	25_3_1	C	0.75	0.25	7	-
			102	100_3_1	C	0	1	8	-		45	75_3_1	C	0.25	0.75	8	-		102	50_3_1	C	0.5	0.5	8	-		73	25_3_1	C	0.75	0.25	8	-
			75	100_3_1	C	0	1	9	-		31	75_3_1	C	0.25	0.75	9	-		53	50_3_1	C	0.5	0.5	9	-		47	25_3_1	C	0.75	0.25	9	-
			68	100_3_1	C	0	1	10	-		110	75_3_1	C	0.25	0.75	10	9		96	50_3_1	C	0.5	0.5	10	9		84	25_3_1	C	0.75	0.25	10	9
			81	100_3_2	C	0	1	1	-		50	75_3_2	C	0.25	0.75	1	-		80	50_3_2	C	0.5	0.5	1	-		99	25_3_2	C	0.75	0.25	1	-
			77	100_3_2	C	0	1	2	-		71	75_3_2	C	0.25	0.75	2	-		100	50_3_2	C	0.5	0.5	2	-		76	25_3_2	C	0.75	0.25	2	-
			122	100_3_2	C	0	1	3	-		44	75_3_2	C	0.25	0.75	3	-		119	50_3_2	C	0.5	0.5	3	-		114	25_3_2	C	0.75	0.25	3	-
			99	100_3_2	C	0	1	4	-		36	75_3_2	C	0.25	0.75	4	-		89	50_3_2	C	0.5	0.5	4	-		97	25_3_2	C	0.75	0.25	4	-
			85	100_3_2	C	0	1	5	-		26	75_3_2	C	0.25	0.75	5	-		83	50_3_2	C	0.5	0.5	5	-		45	25_3_2	C	0.75	0.25	5	-
			99	100_3_2	C	0	1	6	-		38	75_3_2	C	0.25	0.75	6	-		86	50_3_2	C	0.5	0.5	6	-		100	25_3_2	C	0.75	0.25	6	-
			88	100_3_2	C	0	1	7	-		93	75_3_2	C	0.25	0.75	7	-		95	50_3_2	C	0.5	0.5	7	-		107	25_3_2	C	0.75	0.25	7	-
			108	100_3_2	C	0	1	8	-		88	75_3_2	C	0.25	0.75	8	-		64	50_3_2	C	0.5	0.5	8	-		93	25_3_2	C	0.75	0.25	8	-
			65	100_3_2	C	0	1	9	-		76	75_3_2	C	0.25	0.75	9	-		114	50_3_2	C	0.5	0.5	9	-		74	25_3_2	C	0.75	0.25	9	-
			86	100_3_2	C	0	1	10	-		83	75_3_2	C	0.25	0.75	10	9		77	50_3_2	C	0.5	0.5	10	9		75	25_3_2	C	0.75	0.25	10	9
			81	100_3_3	C	0	1	1	-		71	75_3_3	C	0.25	0.75	1	-		88	50_3_3	C	0.5	0.5	1	-		90	25_3_3	C	0.75	0.25	1	-
			76	100_3_3	C	0	1	2	-		87	75_3_3	C	0.25	0.75	2	-		72	50_3_3	C	0.5	0.5	2	-		77	25_3_3	C	0.75	0.25	2	-
			74	100_3_3	C	0	1	3	-		85	75_3_3	C	0.25	0.75	3	-		81	50_3_3	C	0.5	0.5	3	-		67	25_3_3	C	0.75	0.25	3	-
			82	100_3_3	C	0	1	4	-		82	75_3_3	C	0.25	0.75	4	-		63	50_3_3	C	0.5	0.5	4	-		81	25_3_3	C	0.75	0.25	4	-
			23	100_3_3	C	0	1	5	-		96	75_3_3	C	0.25	0.75	5	-		67	50_3_3	C	0.5	0.5	5	-		84	25_3_3	C	0.75	0.25	5	-
			25	100_3_3	C	0	1	6	-		120	75_3_3	C	0.25	0.75	6	-		53	50_3_3	C	0.5	0.5	6	-		83	25_3_3	C	0.75	0.25	6	-
			16	100_3_3	C	0	1	7	-		148	75_3_3	C	0.25	0.75	7	-		79	50_3_3	C	0.5	0.5	7	-		75	25_3_3	C	0.75	0.25	7	-
			99	100_3_3	C	0	1	8	-		103	75_3_3	C	0.25	0.75	8	-		73	50_3_3	C	0.5	0.5	8	-		50	25_3_3	C	0.75	0.25	8	-
			57	100_3_3	C	0	1	9	-		154	75_3_3	C	0.25	0.75	9	-		81	50_3_3	C	0.5	0.5	9	-		52	25_3_3	C	0.75	0.25	9	-
			0	100_3_3	C	0	1	10	-		88	75_3_3	C	0.25	0.75	10	9		70	50_3_3	C	0.5	0.5	10	9		78	25_3_3	C	0.75	0.25	10	9
			89	100_3_4	C	0	1	1	-		53	75_3_4	C	0.25	0.75	1	-		93	50_3_4	C	0.5	0.5	1	-		87	25_3_4	C	0.75	0.25	1	-
			86	100_3_4	C	0	1	2	-		76	75_3_4	C	0.25	0.75	2	-		91	50_3_4	C	0.5	0.5	2	-		60	25_3_4	C	0.75	0.25	2	-
			79	100_3_4	C	0	1	3	-		103	75_3_4	C	0.25	0.75	3	-		104	50_3_4	C	0.5	0.5	3	-		66	25_3_4	C	0.75	0.25	3	-
			65	100_3_4	C	0	1	4	-		67	75_3_4	C	0.25	0.75	4	-		112	50_3_4	C	0.5	0.5	4	-		75	25_3_4	C	0.75	0.25	4	-
			92	100_3_4	C	0	1	5	-		63	75_3_4	C	0.25	0.75	5	-		105	50_3_4	C	0.5	0.5	5	-		87	25_3_4	C	0.75	0.25	5	-
			112	100_3_4	C	0	1	6	-		118	75_3_4	C	0.25	0.75	6	-		128	50_3_4	C	0.5	0.5	6	-		99	25_3_4	C	0.75	0.25	6	-
			109	100_3_4	C	0	1	7	-		79	75_3_4	C	0.25	0.75	7	-		122	50_3_4	C	0.5	0.5	7	-		101	25_3_4	C	0.75	0.25	7	-
			82	100_3_4	C	0	1	8	-		131	75_3_4	C	0.25	0.75	8	-		97	50_3_4	C	0.5	0.5	8	-		86	25_3_4	C	0.75	0.25	8	-
			57	100_3_4	C	0	1	9	-		100	75_3_4	C	0.25	0.75	9	-		52	50_3_4	C	0.5	0.5	9	-		111	25_3_4	C	0.75	0.25	9	-
			70	100_3_4	C	0	1	10	-		58	75_3_4	C	0.25	0.75	10	9		71	50_3_4	C	0.5	0.5	10	9		92	25_3_4	C	0.75	0.25	10	9
			97	100_3_5	C	0	1	1	-		57	75_3_5	C	0.25	0.75	1	-		99	50_3_5	C	0.5	0.5	1	-		118	25_3_5	C	0.75	0.25	1	-
			96	100_3_5	C	0	1	2	-		66	75_3_5	C	0.25	0.75	2	-		45	50_3_5	C	0.5	0.5	2	-		91	25_3_5	C	0.75	0.25	2	-
			74	100_3_5	C	0	1	3	-		77	75_3_5	C	0.25	0.75	3	-		93	50_3_5	C	0.5	0.5	3	-		116	25_3_5	C	0.75	0.25	3	-
			54	100_3_5	C	0	1	4	-		95	75_3_5	C	0.25	0.75	4	-		69	50_3_5	C	0.5	0.5	4	-		88	25_3_5	C	0.75	0.25	4	-
			60	100_3_5	C	0	1	5	-		104	75_3_5	C	0.25	0.75	5	-		56	50_3_5	C	0.5	0.5	5	-		72	25_3_5	C	0.75	0.25	5	-
			98	100_3_5	C	0	1	6	-		119	75_3_5	C	0.25	0.75	6	-		73	50_3_5	C	0.5	0.5	6	-		77	25_3_5	C	0.75	0.25	6	-
			130	100_3_5	C	0	1	7	-		75	75_3_5	C	0.25	0.75	7	-		94	50_3_5	C	0.5	0.5	7	-		81	25_3_5	C	0.75	0.25	7	-
			101	100_3_5	C	0	1	8	-		62	75_3_5	C	0.25	0.75	8	-		66	50_3_5	C	0.5	0.5	8	-		65	25_3_5	C	0.75	0.25	8	-
			123	100_3_5	C	0	1	9	-		57	75_3_5	C	0.25	0.75	9	-		85	50_3_5	C	0.5	0.5	9	-		68	25_3_5	C	0.75	0.25	9	-
			110	100_3_5	C	0	1	10	-		79	75_3_5	C	0.25	0.75	10	9		60	50_3_5	C	0.5	0.5	10	9		93	25_3_5	C	0.75	0.25	10	9
			85	100_3_6	C	0	1	1	-		83	75_3_6	C	0.25	0.75	1	-		106	50_3_6	C	0.5	0.5	1	-		71	25_3_6	C	0.75	0.25	1	-
			63	100_3_6	C	0	1	2	-		71	75_3_6	C	0.25	0.75	2	-		59	50_3_6	C	0.5	0.5	2	-		82	25_3_6	C	0.75	0.25	2	-
			102	100_3_6	C	0	1	3	-		118	75_3_6	C	0.25	0.75	3	-		116	50_3_6	C	0.5	0.5	3	-		109	25_3_6	C	0.75	0.25	3	-
			100	100_3_6	C	0	1	4	-		92	75_3_6	C	0.25	0.75	4	-		90	50_3_6	C	0.5	0.5	4	-		80	25_3_6	C	0.75	0.25	4	-
			80	100_3_6	C	0	1	5	-		87	75_3_6	C	0.25	0.75	5	-		65	50_3_6	C	0.5	0.5	5	-		80	25_3_6	C	0.75	0.25	5	-
			81	100_3_6	C	0	1	6	-		101	75_3_6	C	0.25	0.75	6	-		71	50_3_6	C	0.5	0.5	6	-		99	25_3_6	C	0.75	0.25	6	-
			88	100_3_6	C	0	1	7	-		94	75_3_6	C	0.25	0.75	7	-		94	50_3_6	C	0.5	0.5	7	-		92	25_3_6	C	0.75	0.25	7	-
			71	100_3_6	C	0	1	8	-		57	75_3_6	C	0.25	0.75	8	-		89	50_3_6	C	0.5	0.5	8	-		46	25_3_6	C	0.75	0.25	8	-
			35	100_3_6	C	0	1	9	-		60	75_3_6	C	0.25	0.75	9	-		69	50_3_6	C	0.5	0.5	9	-		72	25_3_6	C	0.75	0.25	9	-
			51	100_3_6	C	0	1	10	-		105	75_3_6	C	0.25	0.75	10	9		69	50_3_6	C	0.5	0.5	10	9		80	25_3_6	C	0.75	0.25	10	9
			76	100_3_7	C	0	1	1	-		75	75_3_7	C	0.25	0.75	1	-		83	50_3_7	C	0.5	0.5	1	-		88	25_3_7	C	0.75	0.25	1	-
			68	100_3_7	C	0	1	2	-		77	75_3_7	C	0.25	0.75	2	-		66	50_3_7	C	0.5	0.5	2	-		76	25_3_7	C	0.75	0.25	2	-
			65	100_3_7	C	0	1	3	-		81	75_3_7	C	0.25	0.75	3	-		98	50_3_7	C	0.5	0.5	3	-		65	25_3_7	C	0.75	0.25	3	-
			59	100_3_7	C	0	1	4	-		67	75_3_7	C	0.25	0.75	4	-		77	50_3_7	C	0.5	0.5	4	-		63	25_3_7	C	0.75	0.25	4	-
			72	100_3_7	C	0	1	5	-		74	75_3_7	C	0.25	0.75	5	-		86	50_3_7	C	0.5	0.5	5	-		84	25_3_7	C	0.75	0.25	5	-
			92	100_3_7	C	0	1	6	-		68	75_3_7	C	0.25	0.75	6	-		82	50_3_7	C	0.5	0.5	6	-		73	25_3_7	C	0.75	0.25	6	-
			90	100_3_7	C	0	1	7	-		81	75_3_7	C	0.25	0.75	7	-		85	50_3_7	C	0.5	0.5	7	-		103	25_3_7	C	0.75	0.25	7	-
			65	100_3_7	C	0	1	8	-		73	75_3_7	C	0.25	0.75	8	-		78	50_3_7	C	0.5	0.5	8	-		60	25_3_7	C	0.75	0.25	8	-
			110	100_3_7	C	0	1	9	-		85	75_3_7	C	0.25	0.75	9	-		83	50_3_7	C	0.5	0.5	9	-		134	25_3_7	C	0.75	0.25	9	-
			95	100_3_7	C	0	1	10	-		139	75_3_7	C	0.25	0.75	10	9		62	50_3_7	C	0.5	0.5	10	9		50	25_3_7	C	0.75	0.25	10	9

## Sheet: Genotyping Fluctuating
This data sheet contains the genotyping data for each experimental population for the fluctuating population size aproach in Experiment 2.
				0% TFT									25% TFT									50% TFT									75% TFT
				Genotype frequency		Experimental population	Biological Replicate	Starting Proportion		Sampling generation	Females genotyped (n)		Genotype frequency		Experimental population	Biological Replicate	Starting Proportion		Sampling generation	Females genotyped (n)		Genotype frequency		Experimental population	Biological Replicate	Starting Proportion		Sampling generation	Females genotyped (n)		Genotype frequency		Experimental population	Biological Replicate	Starting Proportion		Sampling generation	Females genotyped (n)
				TFT	DAH			TFT	DAH				TFT	DAH			TFT	DAH				TFT	DAH			TFT	DAH				TFT	DAH			TFT	DAH
				0	1	100_1_1	A	0	1	10	9		0.222222	0.777778	75_1_1	A	0.25	0.75	10	9		0.333333	0.666667	50_1_1	A	0.5	0.5	10	9		0.333333	0.666667	25_1_1	A	0.75	0.25	10	9
				0	1	100_1_2	A	0	1	10	9		0.111111	0.888889	75_1_2	A	0.25	0.75	10	9		0.666667	0.888889	50_1_2	A	0.5	0.5	10	9	5 heteroplasmies	1	0	25_1_2	A	0.75	0.25	10	9
				0	1	100_1_3	A	0	1	10	9		0.222222	0.777778	75_1_3	A	0.25	0.75	10	9		0.333333	0.666667	50_1_3	A	0.5	0.5	10	9		0.888889	0.111111	25_1_3	A	0.75	0.25	10	9
				0	1	100_1_4	A	0	1	10	9		0.444444	0.555556	75_1_4	A	0.25	0.75	10	9		0.666667	0.333333	50_1_4	A	0.5	0.5	10	9		0.888889	0.111111	25_1_4	A	0.75	0.25	10	9
				0	1	100_1_5	A	0	1	10	9		0.333333	0.666667	75_1_5	A	0.25	0.75	10	9		0	1	50_1_5	A	0.5	0.5	10	9		0.333333	0.666667	25_1_5	A	0.75	0.25	10	9
				0	1	100_1_6	A	0	1	10	9		0.333333	0.666667	75_1_6	A	0.25	0.75	10	9		0.666667	0.333333	50_1_6	A	0.5	0.5	10	9		0.888889	0.111111	25_1_6	A	0.75	0.25	10	9
				0	1	100_1_7	A	0	1	10	9		0.777778	0.222222	75_1_7	A	0.25	0.75	10	9		0.444444	0.555556	50_1_7	A	0.5	0.5	10	9		0.888889	0.111111	25_1_7	A	0.75	0.25	10	9
				0	1	100_2_1	B	0	1	10	9		0.111111	0.888889	75_2_1	B	0.25	0.75	10	9		0.333333	0.666667	50_2_1	B	0.5	0.5	10	9		0.666667	0.333333	25_2_1	B	0.75	0.25	10	9
				0	1	100_2_2	B	0	1	10	9		0	1	75_2_2	B	0.25	0.75	10	9		0.666667	1	50_2_2	B	0.5	0.5	10	9	6 heteroplasmies	1	0	25_2_2	B	0.75	0.25	10	9
				0	1	100_2_3	B	0	1	10	9		0.222222	0.777778	75_2_3	B	0.25	0.75	10	9		0.333333	0.666667	50_2_3	B	0.5	0.5	10	9		0.777778	0.222222	25_2_3	B	0.75	0.25	10	9
				0	1	100_2_4	B	0	1	10	9		0.333333	0.666667	75_2_4	B	0.25	0.75	10	9		1	0	50_2_4	B	0.5	0.5	10	9		0.555556	0.444444	25_2_4	B	0.75	0.25	10	9
				0	1	100_2_5	B	0	1	10	9		0.666667	0.333333	75_2_5	B	0.25	0.75	10	9		0.777778	0.222222	50_2_5	B	0.5	0.5	10	9		0.666667	0.333333	25_2_5	B	0.75	0.25	10	9
				0	1	100_2_6	B	0	1	10	9		0	1	75_2_6	B	0.25	0.75	10	9		0.555556	0.444444	50_2_6	B	0.5	0.5	10	9		0.777778	0.222222	25_2_6	B	0.75	0.25	10	9
				0	1	100_2_7	B	0	1	10	9		1	0	75_2_7	B	0.25	0.75	10	9		1	0	50_2_7	B	0.5	0.5	10	9		0.555556	0.444444	25_2_7	B	0.75	0.25	10	9
				0	1	100_3_1	C	0	1	10	9		0	1	75_3_1	C	0.25	0.75	10	9		0.555556	0.444444	50_3_1	C	0.5	0.5	10	9		1	0	25_3_1	C	0.75	0.25	10	9
				0	1	100_3_2	C	0	1	10	9		0.555556	0.444444	75_3_2	C	0.25	0.75	10	9		0.444444	0.555556	50_3_2	C	0.5	0.5	10	9		0.444444	0.555556	25_3_2	C	0.75	0.25	10	9
				0	1	100_3_3	C	0	1	10	9		0.111111	0.888889	75_3_3	C	0.25	0.75	10	9		0.666667	0.333333	50_3_3	C	0.5	0.5	10	9		0.888889	0.111111	25_3_3	C	0.75	0.25	10	9
				0	1	100_3_4	C	0	1	10	9		0.444444	0.555556	75_3_4	C	0.25	0.75	10	9		0.333333	0.666667	50_3_4	C	0.5	0.5	10	9		1	0	25_3_4	C	0.75	0.25	10	9
				0	1	100_3_5	C	0	1	10	9		0	1	75_3_5	C	0.25	0.75	10	9		0.666667	0.333333	50_3_5	C	0.5	0.5	10	9		0.888889	0.111111	25_3_5	C	0.75	0.25	10	9
				0	1	100_3_6	C	0	1	10	9		0.777778	0.222222	75_3_6	C	0.25	0.75	10	9		1	0	50_3_6	C	0.5	0.5	10	9		0.888889	0.111111	25_3_6	C	0.75	0.25	10	9
				0	1	100_3_7	C	0	1	10	9		0.666667	0.333333	75_3_7	C	0.25	0.75	10	9		1	0	50_3_7	C	0.5	0.5	10	9		0.333333	0.666667	25_3_7	C	0.75	0.25	10	9
