# Supplementary material for: Introduction of a male-harming mitochondrial haplotype via ‘Trojan Females’ achieves population suppression in fruit flies
Source: eLife journal article supplement (doi:10.7554/elife.23551), 2017-05-03
Supplement: supp [file elife_poa_e23551_Table_1_Source_data.xls]

## Sheet: Offspring count Regulated
Raw data for offspring number per generation for each experimental populations for the regulated population size approach in Experiment 1. Each generation vials were trimmed to 80 eggs, and offspring were counted after eclosion each generation for ten generations. Each table represents one of four distinct ratios of fly pairs (one male and one female per pair) used to establish the founding popul…				0% TFT								25% TFT								50% TFT								75% TFT
				Number of offspring	Experimental population	Biological Replicate	Starting Proportion		Generation	Number of females genotyped		Offspring	Experimental population	Biological Replicate	Starting Proportion		Generation	Number of females genotyped		Offspring	Experimental population	Biological Replicate	Starting Proportion		Generation	Number of females genotyped		Offspring	Experimental population	Biological Replicate	Starting Proportion		Generation	Number of females genotyped
							TFT (BRO)	DAH							TFT	DAH							TFT	wt							TFT	wt
				80	100_1_8	A	0	1	1	7		76	75_1_8	A	0.25	0.75	1	7		76	50_1_8	A	0.5	0.5	1	7		75	25_1_8	A	0.75	0.25	1	7
				70	100_1_8	A	0	1	2	-		68	75_1_8	A	0.25	0.75	2	-		53	50_1_8	A	0.5	0.5	2	-		75	25_1_8	A	0.75	0.25	2	-
				77	100_1_8	A	0	1	3	-		75	75_1_8	A	0.25	0.75	3	-		79	50_1_8	A	0.5	0.5	3	-		80	25_1_8	A	0.75	0.25	3	-
				76	100_1_8	A	0	1	4	-		66	75_1_8	A	0.25	0.75	4	-		73	50_1_8	A	0.5	0.5	4	-		78	25_1_8	A	0.75	0.25	4	-
				66	100_1_8	A	0	1	5	7		72	75_1_8	A	0.25	0.75	5	7		73	50_1_8	A	0.5	0.5	5	7		69	25_1_8	A	0.75	0.25	5	7
				71	100_1_8	A	0	1	6	-		72	75_1_8	A	0.25	0.75	6	-		60	50_1_8	A	0.5	0.5	6	-		64	25_1_8	A	0.75	0.25	6	-
				77	100_1_8	A	0	1	7	-		74	75_1_8	A	0.25	0.75	7	-		70	50_1_8	A	0.5	0.5	7	-		68	25_1_8	A	0.75	0.25	7	-
				76	100_1_8	A	0	1	8	-		76	75_1_8	A	0.25	0.75	8	-		69	50_1_8	A	0.5	0.5	8	-		67	25_1_8	A	0.75	0.25	8	-
				78	100_1_8	A	0	1	9	-		73	75_1_8	A	0.25	0.75	9	-		63	50_1_8	A	0.5	0.5	9	-		62	25_1_8	A	0.75	0.25	9	-
				77	100_1_8	A	0	1	10	7		66	75_1_8	A	0.25	0.75	10	7		71	50_1_8	A	0.5	0.5	10	7		68	25_1_8	A	0.75	0.25	10	7
				77	100_1_9	A	0	1	1	7		75	75_1_9	A	0.25	0.75	1	7		75	50_1_9	A	0.5	0.5	1	7		65	25_1_9	A	0.75	0.25	1	7
				65	100_1_9	A	0	1	2	-		76	75_1_9	A	0.25	0.75	2	-		51	50_1_9	A	0.5	0.5	2	-		72	25_1_9	A	0.75	0.25	2	-
				66	100_1_9	A	0	1	3	-		65	75_1_9	A	0.25	0.75	3	-		71	50_1_9	A	0.5	0.5	3	-		65	25_1_9	A	0.75	0.25	3	-
				63	100_1_9	A	0	1	4	-		63	75_1_9	A	0.25	0.75	4	-		52	50_1_9	A	0.5	0.5	4	-		75	25_1_9	A	0.75	0.25	4	-
				81	100_1_9	A	0	1	5	7		68	75_1_9	A	0.25	0.75	5	7		67	50_1_9	A	0.5	0.5	5	7		68	25_1_9	A	0.75	0.25	5	7
				76	100_1_9	A	0	1	6	-		69	75_1_9	A	0.25	0.75	6	-		70	50_1_9	A	0.5	0.5	6	-		68	25_1_9	A	0.75	0.25	6	-
				79	100_1_9	A	0	1	7	-		71	75_1_9	A	0.25	0.75	7	-		64	50_1_9	A	0.5	0.5	7	-		67	25_1_9	A	0.75	0.25	7	-
				80	100_1_9	A	0	1	8	-		78	75_1_9	A	0.25	0.75	8	-		69	50_1_9	A	0.5	0.5	8	-		69	25_1_9	A	0.75	0.25	8	-
				76	100_1_9	A	0	1	9	-		72	75_1_9	A	0.25	0.75	9	-		69	50_1_9	A	0.5	0.5	9	-		63	25_1_9	A	0.75	0.25	9	-
				76	100_1_9	A	0	1	10	7		75	75_1_9	A	0.25	0.75	10	7		70	50_1_9	A	0.5	0.5	10	7		64	25_1_9	A	0.75	0.25	10	7
				76	100_1_10	A	0	1	1	7		78	75_1_10	A	0.25	0.75	1	7		77	50_1_10	A	0.5	0.5	1	7		76	25_1_10	A	0.75	0.25	1	7
				79	100_1_10	A	0	1	2	-		63	75_1_10	A	0.25	0.75	2	-		74	50_1_10	A	0.5	0.5	2	-		77	25_1_10	A	0.75	0.25	2	-
				70	100_1_10	A	0	1	3	-		77	75_1_10	A	0.25	0.75	3	-		72	50_1_10	A	0.5	0.5	3	-		71	25_1_10	A	0.75	0.25	3	-
				76	100_1_10	A	0	1	4	-		66	75_1_10	A	0.25	0.75	4	-		74	50_1_10	A	0.5	0.5	4	-		76	25_1_10	A	0.75	0.25	4	-
				73	100_1_10	A	0	1	5	7		68	75_1_10	A	0.25	0.75	5	7		70	50_1_10	A	0.5	0.5	5	7		66	25_1_10	A	0.75	0.25	5	7
				74	100_1_10	A	0	1	6	-		71	75_1_10	A	0.25	0.75	6	-		67	50_1_10	A	0.5	0.5	6	-		66	25_1_10	A	0.75	0.25	6	-
				75	100_1_10	A	0	1	7	-		71	75_1_10	A	0.25	0.75	7	-		73	50_1_10	A	0.5	0.5	7	-		64	25_1_10	A	0.75	0.25	7	-
				74	100_1_10	A	0	1	8	-		73	75_1_10	A	0.25	0.75	8	-		67	50_1_10	A	0.5	0.5	8	-		67	25_1_10	A	0.75	0.25	8	-
				72	100_1_10	A	0	1	9	-		71	75_1_10	A	0.25	0.75	9	-		78	50_1_10	A	0.5	0.5	9	-		67	25_1_10	A	0.75	0.25	9	-
				74	100_1_10	A	0	1	10	7		69	75_1_10	A	0.25	0.75	10	7		72	50_1_10	A	0.5	0.5	10	7		64	25_1_10	A	0.75	0.25	10	7
				76	100_1_11	A	0	1	1	7		75	75_1_11	A	0.25	0.75	1	7		78	50_1_11	A	0.5	0.5	1	7		78	25_1_11	A	0.75	0.25	1	7
				78	100_1_11	A	0	1	2	-		76	75_1_11	A	0.25	0.75	2	-		75	50_1_11	A	0.5	0.5	2	-		68	25_1_11	A	0.75	0.25	2	-
				79	100_1_11	A	0	1	3	-		70	75_1_11	A	0.25	0.75	3	-		60	50_1_11	A	0.5	0.5	3	-		65	25_1_11	A	0.75	0.25	3	-
				75	100_1_11	A	0	1	4	-		74	75_1_11	A	0.25	0.75	4	-		70	50_1_11	A	0.5	0.5	4	-		73	25_1_11	A	0.75	0.25	4	-
				80	100_1_11	A	0	1	5	7		80	75_1_11	A	0.25	0.75	5	7		74	50_1_11	A	0.5	0.5	5	7		63	25_1_11	A	0.75	0.25	5	7
				76	100_1_11	A	0	1	6	-		71	75_1_11	A	0.25	0.75	6	-		71	50_1_11	A	0.5	0.5	6	-		71	25_1_11	A	0.75	0.25	6	-
				77	100_1_11	A	0	1	7	-		72	75_1_11	A	0.25	0.75	7	-		66	50_1_11	A	0.5	0.5	7	-		66	25_1_11	A	0.75	0.25	7	-
				71	100_1_11	A	0	1	8	-		75	75_1_11	A	0.25	0.75	8	-		65	50_1_11	A	0.5	0.5	8	-		69	25_1_11	A	0.75	0.25	8	-
				69	100_1_11	A	0	1	9	-		73	75_1_11	A	0.25	0.75	9	-		73	50_1_11	A	0.5	0.5	9	-		69	25_1_11	A	0.75	0.25	9	-
				70	100_1_11	A	0	1	10	7		79	75_1_11	A	0.25	0.75	10	7		66	50_1_11	A	0.5	0.5	10	7		65	25_1_11	A	0.75	0.25	10	7
				73	100_1_12	A	0	1	1	7		76	75_1_12	A	0.25	0.75	1	7		79	50_1_12	A	0.5	0.5	1	7		79	25_1_12	A	0.75	0.25	1	7
				48	100_1_12	A	0	1	2	-		78	75_1_12	A	0.25	0.75	2	-		79	50_1_12	A	0.5	0.5	2	-		70	25_1_12	A	0.75	0.25	2	-
				72	100_1_12	A	0	1	3	-		76	75_1_12	A	0.25	0.75	3	-		53	50_1_12	A	0.5	0.5	3	-		72	25_1_12	A	0.75	0.25	3	-
				75	100_1_12	A	0	1	4	-		80	75_1_12	A	0.25	0.75	4	-		74	50_1_12	A	0.5	0.5	4	-		65	25_1_12	A	0.75	0.25	4	-
				80	100_1_12	A	0	1	5	7		73	75_1_12	A	0.25	0.75	5	7		71	50_1_12	A	0.5	0.5	5	7		73	25_1_12	A	0.75	0.25	5	7
				76	100_1_12	A	0	1	6	-		72	75_1_12	A	0.25	0.75	6	-		65	50_1_12	A	0.5	0.5	6	-		73	25_1_12	A	0.75	0.25	6	-
				69	100_1_12	A	0	1	7	-		71	75_1_12	A	0.25	0.75	7	-		71	50_1_12	A	0.5	0.5	7	-		69	25_1_12	A	0.75	0.25	7	-
				77	100_1_12	A	0	1	8	-		75	75_1_12	A	0.25	0.75	8	-		66	50_1_12	A	0.5	0.5	8	-		74	25_1_12	A	0.75	0.25	8	-
				71	100_1_12	A	0	1	9	-		69	75_1_12	A	0.25	0.75	9	-		70	50_1_12	A	0.5	0.5	9	-		71	25_1_12	A	0.75	0.25	9	-
				0	100_1_12	A	0	1	10	7		68	75_1_12	A	0.25	0.75	10	7		68	50_1_12	A	0.5	0.5	10	7		67	25_1_12	A	0.75	0.25	10	7
				77	100_1_13	A	0	1	1	7		80	75_1_13	A	0.25	0.75	1	7		79	50_1_13	A	0.5	0.5	1	7		75	25_1_13	A	0.75	0.25	1	7
				57	100_1_13	A	0	1	2	-		71	75_1_13	A	0.25	0.75	2	-		75	50_1_13	A	0.5	0.5	2	-		67	25_1_13	A	0.75	0.25	2	-
				70	100_1_13	A	0	1	3	-		67	75_1_13	A	0.25	0.75	3	-		78	50_1_13	A	0.5	0.5	3	-		62	25_1_13	A	0.75	0.25	3	-
				70	100_1_13	A	0	1	4	-		77	75_1_13	A	0.25	0.75	4	-		79	50_1_13	A	0.5	0.5	4	-		67	25_1_13	A	0.75	0.25	4	-
				74	100_1_13	A	0	1	5	7		77	75_1_13	A	0.25	0.75	5	7		72	50_1_13	A	0.5	0.5	5	7		68	25_1_13	A	0.75	0.25	5	7
				72	100_1_13	A	0	1	6	-		71	75_1_13	A	0.25	0.75	6	-		69	50_1_13	A	0.5	0.5	6	-		62	25_1_13	A	0.75	0.25	6	-
				70	100_1_13	A	0	1	7	-		73	75_1_13	A	0.25	0.75	7	-		67	50_1_13	A	0.5	0.5	7	-		61	25_1_13	A	0.75	0.25	7	-
				78	100_1_13	A	0	1	8	-		76	75_1_13	A	0.25	0.75	8	-		67	50_1_13	A	0.5	0.5	8	-		64	25_1_13	A	0.75	0.25	8	-
				71	100_1_13	A	0	1	9	-		74	75_1_13	A	0.25	0.75	9	-		65	50_1_13	A	0.5	0.5	9	-		63	25_1_13	A	0.75	0.25	9	-
				76	100_1_13	A	0	1	10	7		69	75_1_13	A	0.25	0.75	10	7		68	50_1_13	A	0.5	0.5	10	7		65	25_1_13	A	0.75	0.25	10	7
				78	100_1_14	A	0	1	1	7		77	75_1_14	A	0.25	0.75	1	7		77	50_1_14	A	0.5	0.5	1	7		78	25_1_14	A	0.75	0.25	1	7
				70	100_1_14	A	0	1	2	-		76	75_1_14	A	0.25	0.75	2	-		73	50_1_14	A	0.5	0.5	2	-		63	25_1_14	A	0.75	0.25	2	-
				67	100_1_14	A	0	1	3	-		81	75_1_14	A	0.25	0.75	3	-		74	50_1_14	A	0.5	0.5	3	-		83	25_1_14	A	0.75	0.25	3	-
				49	100_1_14	A	0	1	4	-		71	75_1_14	A	0.25	0.75	4	-		80	50_1_14	A	0.5	0.5	4	-		72	25_1_14	A	0.75	0.25	4	-
				70	100_1_14	A	0	1	5	7		79	75_1_14	A	0.25	0.75	5	7		72	50_1_14	A	0.5	0.5	5	7		61	25_1_14	A	0.75	0.25	5	7
				75	100_1_14	A	0	1	6	-		69	75_1_14	A	0.25	0.75	6	-		66	50_1_14	A	0.5	0.5	6	-		65	25_1_14	A	0.75	0.25	6	-
				79	100_1_14	A	0	1	7	-		71	75_1_14	A	0.25	0.75	7	-		69	50_1_14	A	0.5	0.5	7	-		64	25_1_14	A	0.75	0.25	7	-
				65	100_1_14	A	0	1	8	-		75	75_1_14	A	0.25	0.75	8	-		63	50_1_14	A	0.5	0.5	8	-		70	25_1_14	A	0.75	0.25	8	-
				73	100_1_14	A	0	1	9	-		80	75_1_14	A	0.25	0.75	9	-		65	50_1_14	A	0.5	0.5	9	-		72	25_1_14	A	0.75	0.25	9	-
				70	100_1_14	A	0	1	10	7		74	75_1_14	A	0.25	0.75	10	7		61	50_1_14	A	0.5	0.5	10	7		66	25_1_14	A	0.75	0.25	10	7
				74	100_2_8	B	0	1	1	7		74	75_2_8	B	0.25	0.75	1	7		79	50_2_8	B	0.5	0.5	1	7		74	25_2_8	B	0.75	0.25	1	7
				56	100_2_8	B	0	1	2	-		70	75_2_8	B	0.25	0.75	2	-		82	50_2_8	B	0.5	0.5	2	-		68	25_2_8	B	0.75	0.25	2	-
				69	100_2_8	B	0	1	3	-		70	75_2_8	B	0.25	0.75	3	-		65	50_2_8	B	0.5	0.5	3	-		64	25_2_8	B	0.75	0.25	3	-
				72	100_2_8	B	0	1	4	-		61	75_2_8	B	0.25	0.75	4	-		70	50_2_8	B	0.5	0.5	4	-		72	25_2_8	B	0.75	0.25	4	-
				72	100_2_8	B	0	1	5	7		73	75_2_8	B	0.25	0.75	5	7		74	50_2_8	B	0.5	0.5	5	7		66	25_2_8	B	0.75	0.25	5	7
				70	100_2_8	B	0	1	6	-		73	75_2_8	B	0.25	0.75	6	-		71	50_2_8	B	0.5	0.5	6	-		69	25_2_8	B	0.75	0.25	6	-
				68	100_2_8	B	0	1	7	-		76	75_2_8	B	0.25	0.75	7	-		64	50_2_8	B	0.5	0.5	7	-		65	25_2_8	B	0.75	0.25	7	-
				73	100_2_8	B	0	1	8	-		75	75_2_8	B	0.25	0.75	8	-		66	50_2_8	B	0.5	0.5	8	-		68	25_2_8	B	0.75	0.25	8	-
				75	100_2_8	B	0	1	9	-		71	75_2_8	B	0.25	0.75	9	-		70	50_2_8	B	0.5	0.5	9	-		67	25_2_8	B	0.75	0.25	9	-
				77	100_2_8	B	0	1	10	7		76	75_2_8	B	0.25	0.75	10	7		53	50_2_8	B	0.5	0.5	10	7		66	25_2_8	B	0.75	0.25	10	7
				75	100_2_9	B	0	1	1	7		71	75_2_9	B	0.25	0.75	1	7		73	50_2_9	B	0.5	0.5	1	7		74	25_2_9	B	0.75	0.25	1	7
				80	100_2_9	B	0	1	2	-		73	75_2_9	B	0.25	0.75	2	-		67	50_2_9	B	0.5	0.5	2	-		73	25_2_9	B	0.75	0.25	2	-
				71	100_2_9	B	0	1	3	-		75	75_2_9	B	0.25	0.75	3	-		67	50_2_9	B	0.5	0.5	3	-		80	25_2_9	B	0.75	0.25	3	-
				67	100_2_9	B	0	1	4	-		79	75_2_9	B	0.25	0.75	4	-		69	50_2_9	B	0.5	0.5	4	-		70	25_2_9	B	0.75	0.25	4	-
				70	100_2_9	B	0	1	5	7		71	75_2_9	B	0.25	0.75	5	7		53	50_2_9	B	0.5	0.5	5	7		69	25_2_9	B	0.75	0.25	5	7
				78	100_2_9	B	0	1	6	-		74	75_2_9	B	0.25	0.75	6	-		67	50_2_9	B	0.5	0.5	6	-		67	25_2_9	B	0.75	0.25	6	-
				70	100_2_9	B	0	1	7	-		67	75_2_9	B	0.25	0.75	7	-		73	50_2_9	B	0.5	0.5	7	-		64	25_2_9	B	0.75	0.25	7	-
				76	100_2_9	B	0	1	8	-		72	75_2_9	B	0.25	0.75	8	-		66	50_2_9	B	0.5	0.5	8	-		66	25_2_9	B	0.75	0.25	8	-
				69	100_2_9	B	0	1	9	-		72	75_2_9	B	0.25	0.75	9	-		73	50_2_9	B	0.5	0.5	9	-		60	25_2_9	B	0.75	0.25	9	-
				72	100_2_9	B	0	1	10	7		71	75_2_9	B	0.25	0.75	10	7		69	50_2_9	B	0.5	0.5	10	7		64	25_2_9	B	0.75	0.25	10	7
				78	100_2_10	B	0	1	1	7		78	75_2_10	B	0.25	0.75	1	7		83	50_2_10	B	0.5	0.5	1	7		75	25_2_10	B	0.75	0.25	1	7
				73	100_2_10	B	0	1	2	-		60	75_2_10	B	0.25	0.75	2	-		72	50_2_10	B	0.5	0.5	2	-		72	25_2_10	B	0.75	0.25	2	-
				69	100_2_10	B	0	1	3	-		66	75_2_10	B	0.25	0.75	3	-		66	50_2_10	B	0.5	0.5	3	-		69	25_2_10	B	0.75	0.25	3	-
				67	100_2_10	B	0	1	4	-		57	75_2_10	B	0.25	0.75	4	-		70	50_2_10	B	0.5	0.5	4	-		72	25_2_10	B	0.75	0.25	4	-
				71	100_2_10	B	0	1	5	7		73	75_2_10	B	0.25	0.75	5	7		73	50_2_10	B	0.5	0.5	5	7		67	25_2_10	B	0.75	0.25	5	7
				68	100_2_10	B	0	1	6	-		73	75_2_10	B	0.25	0.75	6	-		70	50_2_10	B	0.5	0.5	6	-		69	25_2_10	B	0.75	0.25	6	-
				70	100_2_10	B	0	1	7	-		76	75_2_10	B	0.25	0.75	7	-		63	50_2_10	B	0.5	0.5	7	-		72	25_2_10	B	0.75	0.25	7	-
				69	100_2_10	B	0	1	8	-		70	75_2_10	B	0.25	0.75	8	-		74	50_2_10	B	0.5	0.5	8	-		65	25_2_10	B	0.75	0.25	8	-
				69	100_2_10	B	0	1	9	-		73	75_2_10	B	0.25	0.75	9	-		64	50_2_10	B	0.5	0.5	9	-		66	25_2_10	B	0.75	0.25	9	-
				74	100_2_10	B	0	1	10	7		68	75_2_10	B	0.25	0.75	10	7		65	50_2_10	B	0.5	0.5	10	7		64	25_2_10	B	0.75	0.25	10	7
				77	100_2_11	B	0	1	1	7		77	75_2_11	B	0.25	0.75	1	7		77	50_2_11	B	0.5	0.5	1	7		67	25_2_11	B	0.75	0.25	1	7
				70	100_2_11	B	0	1	2	-		66	75_2_11	B	0.25	0.75	2	-		71	50_2_11	B	0.5	0.5	2	-		75	25_2_11	B	0.75	0.25	2	-
				78	100_2_11	B	0	1	3	-		71	75_2_11	B	0.25	0.75	3	-		66	50_2_11	B	0.5	0.5	3	-		74	25_2_11	B	0.75	0.25	3	-
				66	100_2_11	B	0	1	4	-		72	75_2_11	B	0.25	0.75	4	-		72	50_2_11	B	0.5	0.5	4	-		65	25_2_11	B	0.75	0.25	4	-
				71	100_2_11	B	0	1	5	7		76	75_2_11	B	0.25	0.75	5	7		71	50_2_11	B	0.5	0.5	5	7		72	25_2_11	B	0.75	0.25	5	7
				73	100_2_11	B	0	1	6	-		70	75_2_11	B	0.25	0.75	6	-		72	50_2_11	B	0.5	0.5	6	-		66	25_2_11	B	0.75	0.25	6	-
				73	100_2_11	B	0	1	7	-		70	75_2_11	B	0.25	0.75	7	-		63	50_2_11	B	0.5	0.5	7	-		71	25_2_11	B	0.75	0.25	7	-
				74	100_2_11	B	0	1	8	-		58	75_2_11	B	0.25	0.75	8	-		71	50_2_11	B	0.5	0.5	8	-		69	25_2_11	B	0.75	0.25	8	-
				73	100_2_11	B	0	1	9	-		72	75_2_11	B	0.25	0.75	9	-		68	50_2_11	B	0.5	0.5	9	-		66	25_2_11	B	0.75	0.25	9	-
				75	100_2_11	B	0	1	10	7		74	75_2_11	B	0.25	0.75	10	7		63	50_2_11	B	0.5	0.5	10	7		67	25_2_11	B	0.75	0.25	10	7
				76	100_2_12	B	0	1	1	7		75	75_2_12	B	0.25	0.75	1	7		77	50_2_12	B	0.5	0.5	1	7		74	25_2_12	B	0.75	0.25	1	7
				72	100_2_12	B	0	1	2	-		78	75_2_12	B	0.25	0.75	2	-		66	50_2_12	B	0.5	0.5	2	-		62	25_2_12	B	0.75	0.25	2	-
				82	100_2_12	B	0	1	3	-		62	75_2_12	B	0.25	0.75	3	-		70	50_2_12	B	0.5	0.5	3	-		60	25_2_12	B	0.75	0.25	3	-
				73	100_2_12	B	0	1	4	-		80	75_2_12	B	0.25	0.75	4	-		70	50_2_12	B	0.5	0.5	4	-		62	25_2_12	B	0.75	0.25	4	-
				80	100_2_12	B	0	1	5	7		75	75_2_12	B	0.25	0.75	5	7		57	50_2_12	B	0.5	0.5	5	7		65	25_2_12	B	0.75	0.25	5	7
				70	100_2_12	B	0	1	6	-		72	75_2_12	B	0.25	0.75	6	-		66	50_2_12	B	0.5	0.5	6	-		72	25_2_12	B	0.75	0.25	6	-
				78	100_2_12	B	0	1	7	-		68	75_2_12	B	0.25	0.75	7	-		69	50_2_12	B	0.5	0.5	7	-		67	25_2_12	B	0.75	0.25	7	-
				75	100_2_12	B	0	1	8	-		76	75_2_12	B	0.25	0.75	8	-		69	50_2_12	B	0.5	0.5	8	-		67	25_2_12	B	0.75	0.25	8	-
				74	100_2_12	B	0	1	9	-		73	75_2_12	B	0.25	0.75	9	-		67	50_2_12	B	0.5	0.5	9	-		64	25_2_12	B	0.75	0.25	9	-
				77	100_2_12	B	0	1	10	7		79	75_2_12	B	0.25	0.75	10	7		69	50_2_12	B	0.5	0.5	10	7		72	25_2_12	B	0.75	0.25	10	7
				62	100_2_13	B	0	1	1	7		76	75_2_13	B	0.25	0.75	1	7		74	50_2_13	B	0.5	0.5	1	7		76	25_2_13	B	0.75	0.25	1	7
				77	100_2_13	B	0	1	2	-		64	75_2_13	B	0.25	0.75	2	-		56	50_2_13	B	0.5	0.5	2	-		69	25_2_13	B	0.75	0.25	2	-
				73	100_2_13	B	0	1	3	-		72	75_2_13	B	0.25	0.75	3	-		57	50_2_13	B	0.5	0.5	3	-		77	25_2_13	B	0.75	0.25	3	-
				70	100_2_13	B	0	1	4	-		62	75_2_13	B	0.25	0.75	4	-		69	50_2_13	B	0.5	0.5	4	-		65	25_2_13	B	0.75	0.25	4	-
				65	100_2_13	B	0	1	5	7		63	75_2_13	B	0.25	0.75	5	7		71	50_2_13	B	0.5	0.5	5	7		65	25_2_13	B	0.75	0.25	5	7
				75	100_2_13	B	0	1	6	-		75	75_2_13	B	0.25	0.75	6	-		63	50_2_13	B	0.5	0.5	6	-		63	25_2_13	B	0.75	0.25	6	-
				74	100_2_13	B	0	1	7	-		70	75_2_13	B	0.25	0.75	7	-		71	50_2_13	B	0.5	0.5	7	-		67	25_2_13	B	0.75	0.25	7	-
				73	100_2_13	B	0	1	8	-		70	75_2_13	B	0.25	0.75	8	-		71	50_2_13	B	0.5	0.5	8	-		69	25_2_13	B	0.75	0.25	8	-
				72	100_2_13	B	0	1	9	-		75	75_2_13	B	0.25	0.75	9	-		62	50_2_13	B	0.5	0.5	9	-		65	25_2_13	B	0.75	0.25	9	-
				79	100_2_13	B	0	1	10	7		72	75_2_13	B	0.25	0.75	10	7		66	50_2_13	B	0.5	0.5	10	7		63	25_2_13	B	0.75	0.25	10	7
				81	100_2_14	B	0	1	1	7		77	75_2_14	B	0.25	0.75	1	7		80	50_2_14	B	0.5	0.5	1	7		76	25_2_14	B	0.75	0.25	1	7
				67	100_2_14	B	0	1	2	-		67	75_2_14	B	0.25	0.75	2	-		63	50_2_14	B	0.5	0.5	2	-		66	25_2_14	B	0.75	0.25	2	-
				65	100_2_14	B	0	1	3	-		71	75_2_14	B	0.25	0.75	3	-		76	50_2_14	B	0.5	0.5	3	-		76	25_2_14	B	0.75	0.25	3	-
				67	100_2_14	B	0	1	4	-		79	75_2_14	B	0.25	0.75	4	-		61	50_2_14	B	0.5	0.5	4	-		63	25_2_14	B	0.75	0.25	4	-
				71	100_2_14	B	0	1	5	7		68	75_2_14	B	0.25	0.75	5	7		73	50_2_14	B	0.5	0.5	5	7		55	25_2_14	B	0.75	0.25	5	7
				72	100_2_14	B	0	1	6	-		74	75_2_14	B	0.25	0.75	6	-		66	50_2_14	B	0.5	0.5	6	-		67	25_2_14	B	0.75	0.25	6	-
				74	100_2_14	B	0	1	7	-		76	75_2_14	B	0.25	0.75	7	-		70	50_2_14	B	0.5	0.5	7	-		66	25_2_14	B	0.75	0.25	7	-
				78	100_2_14	B	0	1	8	-		67	75_2_14	B	0.25	0.75	8	-		73	50_2_14	B	0.5	0.5	8	-		67	25_2_14	B	0.75	0.25	8	-
				73	100_2_14	B	0	1	9	-		71	75_2_14	B	0.25	0.75	9	-		65	50_2_14	B	0.5	0.5	9	-		64	25_2_14	B	0.75	0.25	9	-
				78	100_2_14	B	0	1	10	7		72	75_2_14	B	0.25	0.75	10	7		72	50_2_14	B	0.5	0.5	10	7		66	25_2_14	B	0.75	0.25	10	7
				78	100_3_8	C	0	1	1	7		79	75_3_8	C	0.25	0.75	1	7		78	50_3_8	C	0.5	0.5	1	7		78	25_3_8	C	0.75	0.25	1	7
				79	100_3_8	C	0	1	2	-		76	75_3_8	C	0.25	0.75	2	-		82	50_3_8	C	0.5	0.5	2	-		67	25_3_8	C	0.75	0.25	2	-
				83	100_3_8	C	0	1	3	-		71	75_3_8	C	0.25	0.75	3	-		72	50_3_8	C	0.5	0.5	3	-		60	25_3_8	C	0.75	0.25	3	-
				80	100_3_8	C	0	1	4	-		80	75_3_8	C	0.25	0.75	4	-		71	50_3_8	C	0.5	0.5	4	-		73	25_3_8	C	0.75	0.25	4	-
				79	100_3_8	C	0	1	5	7		75	75_3_8	C	0.25	0.75	5	7		70	50_3_8	C	0.5	0.5	5	7		69	25_3_8	C	0.75	0.25	5	7
				69	100_3_8	C	0	1	6	-		69	75_3_8	C	0.25	0.75	6	-		66	50_3_8	C	0.5	0.5	6	-		67	25_3_8	C	0.75	0.25	6	-
				75	100_3_8	C	0	1	7	-		71	75_3_8	C	0.25	0.75	7	-		65	50_3_8	C	0.5	0.5	7	-		70	25_3_8	C	0.75	0.25	7	-
				72	100_3_8	C	0	1	8	-		71	75_3_8	C	0.25	0.75	8	-		67	50_3_8	C	0.5	0.5	8	-		64	25_3_8	C	0.75	0.25	8	-
				74	100_3_8	C	0	1	9	-		70	75_3_8	C	0.25	0.75	9	-		70	50_3_8	C	0.5	0.5	9	-		69	25_3_8	C	0.75	0.25	9	-
				77	100_3_8	C	0	1	10	7		68	75_3_8	C	0.25	0.75	10	7		70	50_3_8	C	0.5	0.5	10	7		70	25_3_8	C	0.75	0.25	10	7
				75	100_3_9	C	0	1	1	7		74	75_3_9	C	0.25	0.75	1	7		77	50_3_9	C	0.5	0.5	1	7		77	25_3_9	C	0.75	0.25	1	7
				75	100_3_9	C	0	1	2	-		73	75_3_9	C	0.25	0.75	2	-		71	50_3_9	C	0.5	0.5	2	-		75	25_3_9	C	0.75	0.25	2	-
				74	100_3_9	C	0	1	3	-		79	75_3_9	C	0.25	0.75	3	-		73	50_3_9	C	0.5	0.5	3	-		78	25_3_9	C	0.75	0.25	3	-
				71	100_3_9	C	0	1	4	-		84	75_3_9	C	0.25	0.75	4	-		72	50_3_9	C	0.5	0.5	4	-		66	25_3_9	C	0.75	0.25	4	-
				76	100_3_9	C	0	1	5	7		80	75_3_9	C	0.25	0.75	5	7		69	50_3_9	C	0.5	0.5	5	7		65	25_3_9	C	0.75	0.25	5	7
				69	100_3_9	C	0	1	6	-		71	75_3_9	C	0.25	0.75	6	-		65	50_3_9	C	0.5	0.5	6	-		72	25_3_9	C	0.75	0.25	6	-
				67	100_3_9	C	0	1	7	-		75	75_3_9	C	0.25	0.75	7	-		59	50_3_9	C	0.5	0.5	7	-		66	25_3_9	C	0.75	0.25	7	-
				67	100_3_9	C	0	1	8	-		78	75_3_9	C	0.25	0.75	8	-		63	50_3_9	C	0.5	0.5	8	-		67	25_3_9	C	0.75	0.25	8	-
				75	100_3_9	C	0	1	9	-		70	75_3_9	C	0.25	0.75	9	-		64	50_3_9	C	0.5	0.5	9	-		71	25_3_9	C	0.75	0.25	9	-
				62	100_3_9	C	0	1	10	7		75	75_3_9	C	0.25	0.75	10	7		72	50_3_9	C	0.5	0.5	10	7		68	25_3_9	C	0.75	0.25	10	7
				67	100_3_10	C	0	1	1	7		77	75_3_10	C	0.25	0.75	1	7		76	50_3_10	C	0.5	0.5	1	7		75	25_3_10	C	0.75	0.25	1	7
				66	100_3_10	C	0	1	2	-		52	75_3_10	C	0.25	0.75	2	-		70	50_3_10	C	0.5	0.5	2	-		73	25_3_10	C	0.75	0.25	2	-
				78	100_3_10	C	0	1	3	-		83	75_3_10	C	0.25	0.75	3	-		79	50_3_10	C	0.5	0.5	3	-		75	25_3_10	C	0.75	0.25	3	-
				75	100_3_10	C	0	1	4	-		70	75_3_10	C	0.25	0.75	4	-		73	50_3_10	C	0.5	0.5	4	-		66	25_3_10	C	0.75	0.25	4	-
				76	100_3_10	C	0	1	5	7		75	75_3_10	C	0.25	0.75	5	7		72	50_3_10	C	0.5	0.5	5	7		70	25_3_10	C	0.75	0.25	5	7
				79	100_3_10	C	0	1	6	-		69	75_3_10	C	0.25	0.75	6	-		66	50_3_10	C	0.5	0.5	6	-		63	25_3_10	C	0.75	0.25	6	-
				76	100_3_10	C	0	1	7	-		74	75_3_10	C	0.25	0.75	7	-		71	50_3_10	C	0.5	0.5	7	-		69	25_3_10	C	0.75	0.25	7	-
				77	100_3_10	C	0	1	8	-		77	75_3_10	C	0.25	0.75	8	-		68	50_3_10	C	0.5	0.5	8	-		64	25_3_10	C	0.75	0.25	8	-
				75	100_3_10	C	0	1	9	-		79	75_3_10	C	0.25	0.75	9	-		69	50_3_10	C	0.5	0.5	9	-		65	25_3_10	C	0.75	0.25	9	-
				80	100_3_10	C	0	1	10	7		69	75_3_10	C	0.25	0.75	10	7		69	50_3_10	C	0.5	0.5	10	7		66	25_3_10	C	0.75	0.25	10	7
				74	100_3_11	C	0	1	1	7		79	75_3_11	C	0.25	0.75	1	7		76	50_3_11	C	0.5	0.5	1	7		79	25_3_11	C	0.75	0.25	1	7
				77	100_3_11	C	0	1	2	-		81	75_3_11	C	0.25	0.75	2	-		77	50_3_11	C	0.5	0.5	2	-		80	25_3_11	C	0.75	0.25	2	-
				81	100_3_11	C	0	1	3	-		75	75_3_11	C	0.25	0.75	3	-		80	50_3_11	C	0.5	0.5	3	-		66	25_3_11	C	0.75	0.25	3	-
				77	100_3_11	C	0	1	4	-		80	75_3_11	C	0.25	0.75	4	-		64	50_3_11	C	0.5	0.5	4	-		77	25_3_11	C	0.75	0.25	4	-
				76	100_3_11	C	0	1	5	7		70	75_3_11	C	0.25	0.75	5	7		64	50_3_11	C	0.5	0.5	5	7		72	25_3_11	C	0.75	0.25	5	7
				66	100_3_11	C	0	1	6	-		70	75_3_11	C	0.25	0.75	6	-		65	50_3_11	C	0.5	0.5	6	-		70	25_3_11	C	0.75	0.25	6	-
				69	100_3_11	C	0	1	7	-		76	75_3_11	C	0.25	0.75	7	-		69	50_3_11	C	0.5	0.5	7	-		65	25_3_11	C	0.75	0.25	7	-
				73	100_3_11	C	0	1	8	-		74	75_3_11	C	0.25	0.75	8	-		55	50_3_11	C	0.5	0.5	8	-		59	25_3_11	C	0.75	0.25	8	-
				74	100_3_11	C	0	1	9	-		73	75_3_11	C	0.25	0.75	9	-		69	50_3_11	C	0.5	0.5	9	-		64	25_3_11	C	0.75	0.25	9	-
				69	100_3_11	C	0	1	10	7		76	75_3_11	C	0.25	0.75	10	7		73	50_3_11	C	0.5	0.5	10	7		62	25_3_11	C	0.75	0.25	10	7
				75	100_3_12	C	0	1	1	7		80	75_3_12	C	0.25	0.75	1	7		79	50_3_12	C	0.5	0.5	1	7		74	25_3_12	C	0.75	0.25	1	7
				79	100_3_12	C	0	1	2	-		81	75_3_12	C	0.25	0.75	2	-		81	50_3_12	C	0.5	0.5	2	-		77	25_3_12	C	0.75	0.25	2	-
				79	100_3_12	C	0	1	3	-		72	75_3_12	C	0.25	0.75	3	-		73	50_3_12	C	0.5	0.5	3	-		74	25_3_12	C	0.75	0.25	3	-
				81	100_3_12	C	0	1	4	-		72	75_3_12	C	0.25	0.75	4	-		77	50_3_12	C	0.5	0.5	4	-		80	25_3_12	C	0.75	0.25	4	-
				79	100_3_12	C	0	1	5	7		73	75_3_12	C	0.25	0.75	5	7		73	50_3_12	C	0.5	0.5	5	7		80	25_3_12	C	0.75	0.25	5	7
				71	100_3_12	C	0	1	6	-		71	75_3_12	C	0.25	0.75	6	-		63	50_3_12	C	0.5	0.5	6	-		72	25_3_12	C	0.75	0.25	6	-
				74	100_3_12	C	0	1	7	-		68	75_3_12	C	0.25	0.75	7	-		71	50_3_12	C	0.5	0.5	7	-		77	25_3_12	C	0.75	0.25	7	-
				74	100_3_12	C	0	1	8	-		69	75_3_12	C	0.25	0.75	8	-		62	50_3_12	C	0.5	0.5	8	-		77	25_3_12	C	0.75	0.25	8	-
				78	100_3_12	C	0	1	9	-		74	75_3_12	C	0.25	0.75	9	-		67	50_3_12	C	0.5	0.5	9	-		71	25_3_12	C	0.75	0.25	9	-
				79	100_3_12	C	0	1	10	7		70	75_3_12	C	0.25	0.75	10	7		67	50_3_12	C	0.5	0.5	10	7		76	25_3_12	C	0.75	0.25	10	7
				78	100_3_13	C	0	1	1	7		77	75_3_13	C	0.25	0.75	1	7		77	50_3_13	C	0.5	0.5	1	7		79	25_3_13	C	0.75	0.25	1	7
				73	100_3_13	C	0	1	2	-		82	75_3_13	C	0.25	0.75	2	-		67	50_3_13	C	0.5	0.5	2	-		81	25_3_13	C	0.75	0.25	2	-
				77	100_3_13	C	0	1	3	-		76	75_3_13	C	0.25	0.75	3	-		72	50_3_13	C	0.5	0.5	3	-		68	25_3_13	C	0.75	0.25	3	-
				72	100_3_13	C	0	1	4	-		75	75_3_13	C	0.25	0.75	4	-		72	50_3_13	C	0.5	0.5	4	-		59	25_3_13	C	0.75	0.25	4	-
				78	100_3_13	C	0	1	5	7		62	75_3_13	C	0.25	0.75	5	7		71	50_3_13	C	0.5	0.5	5	7		66	25_3_13	C	0.75	0.25	5	7
				73	100_3_13	C	0	1	6	-		69	75_3_13	C	0.25	0.75	6	-		68	50_3_13	C	0.5	0.5	6	-		59	25_3_13	C	0.75	0.25	6	-
				76	100_3_13	C	0	1	7	-		71	75_3_13	C	0.25	0.75	7	-		65	50_3_13	C	0.5	0.5	7	-		65	25_3_13	C	0.75	0.25	7	-
				74	100_3_13	C	0	1	8	-		71	75_3_13	C	0.25	0.75	8	-		69	50_3_13	C	0.5	0.5	8	-		66	25_3_13	C	0.75	0.25	8	-
				77	100_3_13	C	0	1	9	-		65	75_3_13	C	0.25	0.75	9	-		62	50_3_13	C	0.5	0.5	9	-		68	25_3_13	C	0.75	0.25	9	-
				71	100_3_13	C	0	1	10	7		66	75_3_13	C	0.25	0.75	10	7		65	50_3_13	C	0.5	0.5	10	7		66	25_3_13	C	0.75	0.25	10	7
				66	100_3_14	C	0	1	1	7		70	75_3_14	C	0.25	0.75	1	7		75	50_3_14	C	0.5	0.5	1	7		79	25_3_14	C	0.75	0.25	1	7
				81	100_3_14	C	0	1	2	-		67	75_3_14	C	0.25	0.75	2	-		78	50_3_14	C	0.5	0.5	2	-		68	25_3_14	C	0.75	0.25	2	-
				72	100_3_14	C	0	1	3	-		72	75_3_14	C	0.25	0.75	3	-		74	50_3_14	C	0.5	0.5	3	-		76	25_3_14	C	0.75	0.25	3	-
				80	100_3_14	C	0	1	4	-		79	75_3_14	C	0.25	0.75	4	-		74	50_3_14	C	0.5	0.5	4	-		68	25_3_14	C	0.75	0.25	4	-
				80	100_3_14	C	0	1	5	7		65	75_3_14	C	0.25	0.75	5	7		76	50_3_14	C	0.5	0.5	5	7		72	25_3_14	C	0.75	0.25	5	7
				72	100_3_14	C	0	1	6	-		69	75_3_14	C	0.25	0.75	6	-		64	50_3_14	C	0.5	0.5	6	-		63	25_3_14	C	0.75	0.25	6	-
				73	100_3_14	C	0	1	7	-		76	75_3_14	C	0.25	0.75	7	-		69	50_3_14	C	0.5	0.5	7	-		66	25_3_14	C	0.75	0.25	7	-
				74	100_3_14	C	0	1	8	-		68	75_3_14	C	0.25	0.75	8	-		63	50_3_14	C	0.5	0.5	8	-		69	25_3_14	C	0.75	0.25	8	-
				72	100_3_14	C	0	1	9	-		73	75_3_14	C	0.25	0.75	9	-		66	50_3_14	C	0.5	0.5	9	-		54	25_3_14	C	0.75	0.25	9	-
				70	100_3_14	C	0	1	10	7		77	75_3_14	C	0.25	0.75	10	7		67	50_3_14	C	0.5	0.5	10	7		65	25_3_14	C	0.75	0.25	10	7

## Sheet: Offspring count Fluctuating
Raw data for offspring number per generation for each experimental population for the fluctuating population size approach in Experiment 2. Each generation offspring were transferred into new vials for ovipositioning until 50% of all vials contained app. 80 eggs upon which ovipositioning was stopped. Each table represents one of four distinct ratios of fly pairs (one male and one female per pair)…			0% TFT								25% TFT								50% TFT								75% TFT
			Number of offspring	Experimental population	Biological Replicate	Starting Proportion		Generation	Number of females genotyped		Number of offspring	Experimental population	Biological Replicate	Starting Proportion		Generation	Number of females genotyped		Number of offspring	Experimental population	Biological Replicate	Starting Proportion		Generation	Number of females genotyped		Number of offspring	Experimental population	Biological Replicate	Starting Proportion		Generation	Number of females genotyped
						TFT (BRO)	DAH							TFT (BRO)	DAH							TFT (BRO)	DAH							TFT (BRO)	DAH
			49	100_1_1	A	0	1	1	-		88	75_1_1	A	0.25	0.75	1	-		52	50_1_1	A	0.5	0.5	1	-		80	25_1_1	A	0.75	0.25	1	-
			70	100_1_1	A	0	1	2	-		85	75_1_1	A	0.25	0.75	2	-		73	50_1_1	A	0.5	0.5	2	-		76	25_1_1	A	0.75	0.25	2	-
			92	100_1_1	A	0	1	3	-		93	75_1_1	A	0.25	0.75	3	-		62	50_1_1	A	0.5	0.5	3	-		80	25_1_1	A	0.75	0.25	3	-
			61	100_1_1	A	0	1	4	-		74	75_1_1	A	0.25	0.75	4	-		77	50_1_1	A	0.5	0.5	4	-		78	25_1_1	A	0.75	0.25	4	-
			74	100_1_1	A	0	1	5	-		65	75_1_1	A	0.25	0.75	5	-		64	50_1_1	A	0.5	0.5	5	-		52	25_1_1	A	0.75	0.25	5	-
			86	100_1_1	A	0	1	6	-		63	75_1_1	A	0.25	0.75	6	-		57	50_1_1	A	0.5	0.5	6	-		61	25_1_1	A	0.75	0.25	6	-
			93	100_1_1	A	0	1	7	-		99	75_1_1	A	0.25	0.75	7	-		44	50_1_1	A	0.5	0.5	7	-		88	25_1_1	A	0.75	0.25	7	-
			66	100_1_1	A	0	1	8	-		78	75_1_1	A	0.25	0.75	8	-		40	50_1_1	A	0.5	0.5	8	-		105	25_1_1	A	0.75	0.25	8	-
			66	100_1_1	A	0	1	9	-		88	75_1_1	A	0.25	0.75	9	-		115	50_1_1	A	0.5	0.5	9	-		31	25_1_1	A	0.75	0.25	9	-
			77	100_1_1	A	0	1	10	-		75	75_1_1	A	0.25	0.75	10	9		88	50_1_1	A	0.5	0.5	10	9		99	25_1_1	A	0.75	0.25	10	9
			65	100_1_2	A	0	1	1	-		107	75_1_2	A	0.25	0.75	1	-		62	50_1_2	A	0.5	0.5	1	-		89	25_1_2	A	0.75	0.25	1	-
			88	100_1_2	A	0	1	2	-		87	75_1_2	A	0.25	0.75	2	-		41	50_1_2	A	0.5	0.5	2	-		90	25_1_2	A	0.75	0.25	2	-
			102	100_1_2	A	0	1	3	-		106	75_1_2	A	0.25	0.75	3	-		15	50_1_2	A	0.5	0.5	3	-		72	25_1_2	A	0.75	0.25	3	-
			74	100_1_2	A	0	1	4	-		79	75_1_2	A	0.25	0.75	4	-		2	50_1_2	A	0.5	0.5	4	-		86	25_1_2	A	0.75	0.25	4	-
			70	100_1_2	A	0	1	5	-		52	75_1_2	A	0.25	0.75	5	-		0	50_1_2	A	0.5	0.5	5	-		69	25_1_2	A	0.75	0.25	5	-
			102	100_1_2	A	0	1	6	-		79	75_1_2	A	0.25	0.75	6	-		0	50_1_2	A	0.5	0.5	6	-		90	25_1_2	A	0.75	0.25	6	-
			92	100_1_2	A	0	1	7	-		109	75_1_2	A	0.25	0.75	7	-		0	50_1_2	A	0.5	0.5	7	-		96	25_1_2	A	0.75	0.25	7	-
			85	100_1_2	A	0	1	8	-		66	75_1_2	A	0.25	0.75	8	-		0	50_1_2	A	0.5	0.5	8	-		109	25_1_2	A	0.75	0.25	8	-
			42	100_1_2	A	0	1	9	-		67	75_1_2	A	0.25	0.75	9	-		0	50_1_2	A	0.5	0.5	9	-		74	25_1_2	A	0.75	0.25	9	-
			80	100_1_2	A	0	1	10	-		80	75_1_2	A	0.25	0.75	10	9		0	50_1_2	A	0.5	0.5	10	9		114	25_1_2	A	0.75	0.25	10	9
			108	100_1_3	A	0	1	1	-		110	75_1_3	A	0.25	0.75	1	-		60	50_1_3	A	0.5	0.5	1	-		50	25_1_3	A	0.75	0.25	1	-
			86	100_1_3	A	0	1	2	-		71	75_1_3	A	0.25	0.75	2	-		91	50_1_3	A	0.5	0.5	2	-		49	25_1_3	A	0.75	0.25	2	-
			68	100_1_3	A	0	1	3	-		69	75_1_3	A	0.25	0.75	3	-		64	50_1_3	A	0.5	0.5	3	-		57	25_1_3	A	0.75	0.25	3	-
			45	100_1_3	A	0	1	4	-		50	75_1_3	A	0.25	0.75	4	-		61	50_1_3	A	0.5	0.5	4	-		76	25_1_3	A	0.75	0.25	4	-
			80	100_1_3	A	0	1	5	-		76	75_1_3	A	0.25	0.75	5	-		88	50_1_3	A	0.5	0.5	5	-		58	25_1_3	A	0.75	0.25	5	-
			71	100_1_3	A	0	1	6	-		68	75_1_3	A	0.25	0.75	6	-		64	50_1_3	A	0.5	0.5	6	-		53	25_1_3	A	0.75	0.25	6	-
			77	100_1_3	A	0	1	7	-		65	75_1_3	A	0.25	0.75	7	-		66	50_1_3	A	0.5	0.5	7	-		49	25_1_3	A	0.75	0.25	7	-
			95	100_1_3	A	0	1	8	-		50	75_1_3	A	0.25	0.75	8	-		53	50_1_3	A	0.5	0.5	8	-		70	25_1_3	A	0.75	0.25	8	-
			63	100_1_3	A	0	1	9	-		62	75_1_3	A	0.25	0.75	9	-		40	50_1_3	A	0.5	0.5	9	-		51	25_1_3	A	0.75	0.25	9	-
			44	100_1_3	A	0	1	10	-		71	75_1_3	A	0.25	0.75	10	9		67	50_1_3	A	0.5	0.5	10	9		66	25_1_3	A	0.75	0.25	10	9
			79	100_1_4	A	0	1	1	-		102	75_1_4	A	0.25	0.75	1	-		68	50_1_4	A	0.5	0.5	1	-		96	25_1_4	A	0.75	0.25	1	-
			97	100_1_4	A	0	1	2	-		58	75_1_4	A	0.25	0.75	2	-		86	50_1_4	A	0.5	0.5	2	-		86	25_1_4	A	0.75	0.25	2	-
			73	100_1_4	A	0	1	3	-		78	75_1_4	A	0.25	0.75	3	-		84	50_1_4	A	0.5	0.5	3	-		64	25_1_4	A	0.75	0.25	3	-
			89	100_1_4	A	0	1	4	-		48	75_1_4	A	0.25	0.75	4	-		89	50_1_4	A	0.5	0.5	4	-		71	25_1_4	A	0.75	0.25	4	-
			58	100_1_4	A	0	1	5	-		74	75_1_4	A	0.25	0.75	5	-		57	50_1_4	A	0.5	0.5	5	-		66	25_1_4	A	0.75	0.25	5	-
			42	100_1_4	A	0	1	6	-		97	75_1_4	A	0.25	0.75	6	-		-	50_1_4	A	0.5	0.5	6	-		80	25_1_4	A	0.75	0.25	6	-
			71	100_1_4	A	0	1	7	-		85	75_1_4	A	0.25	0.75	7	-		75	50_1_4	A	0.5	0.5	7	-		78	25_1_4	A	0.75	0.25	7	-
			48	100_1_4	A	0	1	8	-		74	75_1_4	A	0.25	0.75	8	-		62	50_1_4	A	0.5	0.5	8	-		51	25_1_4	A	0.75	0.25	8	-
			115	100_1_4	A	0	1	9	-		46	75_1_4	A	0.25	0.75	9	-		74	50_1_4	A	0.5	0.5	9	-		105	25_1_4	A	0.75	0.25	9	-
			108	100_1_4	A	0	1	10	-		80	75_1_4	A	0.25	0.75	10	9		52	50_1_4	A	0.5	0.5	10	9		69	25_1_4	A	0.75	0.25	10	9
			111	100_1_5	A	0	1	1	-		92	75_1_5	A	0.25	0.75	1	-		82	50_1_5	A	0.5	0.5	1	-		55	25_1_5	A	0.75	0.25	1	-
			66	100_1_5	A	0	1	2	-		81	75_1_5	A	0.25	0.75	2	-		86	50_1_5	A	0.5	0.5	2	-		61	25_1_5	A	0.75	0.25	2	-
			71	100_1_5	A	0	1	3	-		59	75_1_5	A	0.25	0.75	3	-		39	50_1_5	A	0.5	0.5	3	-		63	25_1_5	A	0.75	0.25	3	-
			79	100_1_5	A	0	1	4	-		67	75_1_5	A	0.25	0.75	4	-		35	50_1_5	A	0.5	0.5	4	-		70	25_1_5	A	0.75	0.25	4	-
			66	100_1_5	A	0	1	5	-		69	75_1_5	A	0.25	0.75	5	-		45	50_1_5	A	0.5	0.5	5	-		55	25_1_5	A	0.75	0.25	5	-
			87	100_1_5	A	0	1	6	-		98	75_1_5	A	0.25	0.75	6	-		91	50_1_5	A	0.5	0.5	6	-		110	25_1_5	A	0.75	0.25	6	-
			66	100_1_5	A	0	1	7	-		134	75_1_5	A	0.25	0.75	7	-		113	50_1_5	A	0.5	0.5	7	-		102	25_1_5	A	0.75	0.25	7	-
			57	100_1_5	A	0	1	8	-		86	75_1_5	A	0.25	0.75	8	-		105	50_1_5	A	0.5	0.5	8	-		85	25_1_5	A	0.75	0.25	8	-
			129	100_1_5	A	0	1	9	-		80	75_1_5	A	0.25	0.75	9	-		58	50_1_5	A	0.5	0.5	9	-		86	25_1_5	A	0.75	0.25	9	-
			88	100_1_5	A	0	1	10	-		82	75_1_5	A	0.25	0.75	10	9		121	50_1_5	A	0.5	0.5	10	9		66	25_1_5	A	0.75	0.25	10	9
			110	100_1_6	A	0	1	1	-		71	75_1_6	A	0.25	0.75	1	-		70	50_1_6	A	0.5	0.5	1	-		55	25_1_6	A	0.75	0.25	1	-
			86	100_1_6	A	0	1	2	-		97	75_1_6	A	0.25	0.75	2	-		53	50_1_6	A	0.5	0.5	2	-		65	25_1_6	A	0.75	0.25	2	-
			103	100_1_6	A	0	1	3	-		85	75_1_6	A	0.25	0.75	3	-		93	50_1_6	A	0.5	0.5	3	-		76	25_1_6	A	0.75	0.25	3	-
			67	100_1_6	A	0	1	4	-		76	75_1_6	A	0.25	0.75	4	-		72	50_1_6	A	0.5	0.5	4	-		68	25_1_6	A	0.75	0.25	4	-
			41	100_1_6	A	0	1	5	-		75	75_1_6	A	0.25	0.75	5	-		67	50_1_6	A	0.5	0.5	5	-		89	25_1_6	A	0.75	0.25	5	-
			2	100_1_6	A	0	1	6	-		59	75_1_6	A	0.25	0.75	6	-		120	50_1_6	A	0.5	0.5	6	-		80	25_1_6	A	0.75	0.25	6	-
			0	100_1_6	A	0	1	7	-		71	75_1_6	A	0.25	0.75	7	-		66	50_1_6	A	0.5	0.5	7	-		91	25_1_6	A	0.75	0.25	7	-
			0	100_1_6	A	0	1	8	-		58	75_1_6	A	0.25	0.75	8	-		41	50_1_6	A	0.5	0.5	8	-		86	25_1_6	A	0.75	0.25	8	-
			0	100_1_6	A	0	1	9	-		99	75_1_6	A	0.25	0.75	9	-		75	50_1_6	A	0.5	0.5	9	-		63	25_1_6	A	0.75	0.25	9	-
			0	100_1_6	A	0	1	10	-		60	75_1_6	A	0.25	0.75	10	9		78	50_1_6	A	0.5	0.5	10	9		94	25_1_6	A	0.75	0.25	10	9
			94	100_1_7	A	0	1	1	-		96	75_1_7	A	0.25	0.75	1	-		81	50_1_7	A	0.5	0.5	1	-		95	25_1_7	A	0.75	0.25	1	-
			80	100_1_7	A	0	1	2	-		86	75_1_7	A	0.25	0.75	2	-		57	50_1_7	A	0.5	0.5	2	-		70	25_1_7	A	0.75	0.25	2	-
			77	100_1_7	A	0	1	3	-		85	75_1_7	A	0.25	0.75	3	-		86	50_1_7	A	0.5	0.5	3	-		73	25_1_7	A	0.75	0.25	3	-
			61	100_1_7	A	0	1	4	-		69	75_1_7	A	0.25	0.75	4	-		92	50_1_7	A	0.5	0.5	4	-		101	25_1_7	A	0.75	0.25	4	-
			55	100_1_7	A	0	1	5	-		84	75_1_7	A	0.25	0.75	5	-		105	50_1_7	A	0.5	0.5	5	-		98	25_1_7	A	0.75	0.25	5	-
			74	100_1_7	A	0	1	6	-		86	75_1_7	A	0.25	0.75	6	-		89	50_1_7	A	0.5	0.5	6	-		116	25_1_7	A	0.75	0.25	6	-
			109	100_1_7	A	0	1	7	-		104	75_1_7	A	0.25	0.75	7	-		93	50_1_7	A	0.5	0.5	7	-		109	25_1_7	A	0.75	0.25	7	-
			82	100_1_7	A	0	1	8	-		57	75_1_7	A	0.25	0.75	8	-		93	50_1_7	A	0.5	0.5	8	-		94	25_1_7	A	0.75	0.25	8	-
			75	100_1_7	A	0	1	9	-		125	75_1_7	A	0.25	0.75	9	-		70	50_1_7	A	0.5	0.5	9	-		73	25_1_7	A	0.75	0.25	9	-
			55	100_1_7	B	0	1	10	-		67	75_1_7	B	0.25	0.75	10	9		101	50_1_7	B	0.5	0.5	10	9		100	25_1_7	B	0.75	0.25	10	9
			67	100_2_1	B	0	1	1	-		60	75_2_1	B	0.25	0.75	1	-		75	50_2_1	B	0.5	0.5	1	-		87	25_2_1	B	0.75	0.25	1	-
			94	100_2_1	B	0	1	2	-		77	75_2_1	B	0.25	0.75	2	-		61	50_2_1	B	0.5	0.5	2	-		71	25_2_1	B	0.75	0.25	2	-
			58	100_2_1	B	0	1	3	-		95	75_2_1	B	0.25	0.75	3	-		95	50_2_1	B	0.5	0.5	3	-		122	25_2_1	B	0.75	0.25	3	-
			46	100_2_1	B	0	1	4	-		69	75_2_1	B	0.25	0.75	4	-		66	50_2_1	B	0.5	0.5	4	-		92	25_2_1	B	0.75	0.25	4	-
			40	100_2_1	B	0	1	5	-		43	75_2_1	B	0.25	0.75	5	-		85	50_2_1	B	0.5	0.5	5	-		81	25_2_1	B	0.75	0.25	5	-
			81	100_2_1	B	0	1	6	-		22	75_2_1	B	0.25	0.75	6	-		97	50_2_1	B	0.5	0.5	6	-		93	25_2_1	B	0.75	0.25	6	-
			72	100_2_1	B	0	1	7	-		42	75_2_1	B	0.25	0.75	7	-		99	50_2_1	B	0.5	0.5	7	-		82	25_2_1	B	0.75	0.25	7	-
			87	100_2_1	B	0	1	8	-		90	75_2_1	B	0.25	0.75	8	-		82	50_2_1	B	0.5	0.5	8	-		51	25_2_1	B	0.75	0.25	8	-
			87	100_2_1	B	0	1	9	-		109	75_2_1	B	0.25	0.75	9	-		180	50_2_1	B	0.5	0.5	9	-		61	25_2_1	B	0.75	0.25	9	-
			128	100_2_1	B	0	1	10	-		68	75_2_1	B	0.25	0.75	10	9		65	50_2_1	B	0.5	0.5	10	9		104	25_2_1	B	0.75	0.25	10	9
			58	100_2_2	B	0	1	1	-		94	75_2_2	B	0.25	0.75	1	-		84	50_2_2	B	0.5	0.5	1	-		56	25_2_2	B	0.75	0.25	1	-
			81	100_2_2	B	0	1	2	-		93	75_2_2	B	0.25	0.75	2	-		64	50_2_2	B	0.5	0.5	2	-		55	25_2_2	B	0.75	0.25	2	-
			98	100_2_2	B	0	1	3	-		99	75_2_2	B	0.25	0.75	3	-		69	50_2_2	B	0.5	0.5	3	-		65	25_2_2	B	0.75	0.25	3	-
			45	100_2_2	B	0	1	4	-		71	75_2_2	B	0.25	0.75	4	-		58	50_2_2	B	0.5	0.5	4	-		68	25_2_2	B	0.75	0.25	4	-
			51	100_2_2	B	0	1	5	-		91	75_2_2	B	0.25	0.75	5	-		32	50_2_2	B	0.5	0.5	5	-		58	25_2_2	B	0.75	0.25	5	-
			76	100_2_2	B	0	1	6	-		85	75_2_2	B	0.25	0.75	6	-		3	50_2_2	B	0.5	0.5	6	-		65	25_2_2	B	0.75	0.25	6	-
			77	100_2_2	B	0	1	7	-		137	75_2_2	B	0.25	0.75	7	-		0	50_2_2	B	0.5	0.5	7	-		67	25_2_2	B	0.75	0.25	7	-
			86	100_2_2	B	0	1	8	-		80	75_2_2	B	0.25	0.75	8	-		0	50_2_2	B	0.5	0.5	8	-		61	25_2_2	B	0.75	0.25	8	-
			112	100_2_2	B	0	1	9	-		52	75_2_2	B	0.25	0.75	9	-		0	50_2_2	B	0.5	0.5	9	-		81	25_2_2	B	0.75	0.25	9	-
			73	100_2_2	B	0	1	10	-		110	75_2_2	B	0.25	0.75	10	9		0	50_2_2	B	0.5	0.5	10	9		69	25_2_2	B	0.75	0.25	10	9
			99	100_2_3	B	0	1	1	-		105	75_2_3	B	0.25	0.75	1	-		80	50_2_3	B	0.5	0.5	1	-		91	25_2_3	B	0.75	0.25	1	-
			76	100_2_3	B	0	1	2	-		74	75_2_3	B	0.25	0.75	2	-		29	50_2_3	B	0.5	0.5	2	-		37	25_2_3	B	0.75	0.25	2	-
			69	100_2_3	B	0	1	3	-		76	75_2_3	B	0.25	0.75	3	-		61	50_2_3	B	0.5	0.5	3	-		70	25_2_3	B	0.75	0.25	3	-
			56	100_2_3	B	0	1	4	-		72	75_2_3	B	0.25	0.75	4	-		51	50_2_3	B	0.5	0.5	4	-		89	25_2_3	B	0.75	0.25	4	-
			80	100_2_3	B	0	1	5	-		65	75_2_3	B	0.25	0.75	5	-		67	50_2_3	B	0.5	0.5	5	-		92	25_2_3	B	0.75	0.25	5	-
			89	100_2_3	B	0	1	6	-		55	75_2_3	B	0.25	0.75	6	-		80	50_2_3	B	0.5	0.5	6	-		100	25_2_3	B	0.75	0.25	6	-
			91	100_2_3	B	0	1	7	-		60	75_2_3	B	0.25	0.75	7	-		109	50_2_3	B	0.5	0.5	7	-		95	25_2_3	B	0.75	0.25	7	-
			46	100_2_3	B	0	1	8	-		62	75_2_3	B	0.25	0.75	8	-		66	50_2_3	B	0.5	0.5	8	-		73	25_2_3	B	0.75	0.25	8	-
			89	100_2_3	B	0	1	9	-		93	75_2_3	B	0.25	0.75	9	-		91	50_2_3	B	0.5	0.5	9	-		51	25_2_3	B	0.75	0.25	9	-
			103	100_2_3	B	0	1	10	-		47	75_2_3	B	0.25	0.75	10	9		142	50_2_3	B	0.5	0.5	10	9		82	25_2_3	B	0.75	0.25	10	9
			43	100_2_4	B	0	1	1	-		88	75_2_4	B	0.25	0.75	1	-		107	50_2_4	B	0.5	0.5	1	-		105	25_2_4	B	0.75	0.25	1	-
			50	100_2_4	B	0	1	2	-		55	75_2_4	B	0.25	0.75	2	-		24	50_2_4	B	0.5	0.5	2	-		68	25_2_4	B	0.75	0.25	2	-
			89	100_2_4	B	0	1	3	-		81	75_2_4	B	0.25	0.75	3	-		42	50_2_4	B	0.5	0.5	3	-		81	25_2_4	B	0.75	0.25	3	-
			64	100_2_4	B	0	1	4	-		75	75_2_4	B	0.25	0.75	4	-		46	50_2_4	B	0.5	0.5	4	-		68	25_2_4	B	0.75	0.25	4	-
			78	100_2_4	B	0	1	5	-		70	75_2_4	B	0.25	0.75	5	-		49	50_2_4	B	0.5	0.5	5	-		76	25_2_4	B	0.75	0.25	5	-
			86	100_2_4	B	0	1	6	-		67	75_2_4	B	0.25	0.75	6	-		87	50_2_4	B	0.5	0.5	6	-		87	25_2_4	B	0.75	0.25	6	-
			66	100_2_4	B	0	1	7	-		88	75_2_4	B	0.25	0.75	7	-		125	50_2_4	B	0.5	0.5	7	-		91	25_2_4	B	0.75	0.25	7	-
			98	100_2_4	B	0	1	8	-		67	75_2_4	B	0.25	0.75	8	-		119	50_2_4	B	0.5	0.5	8	-		83	25_2_4	B	0.75	0.25	8	-
			105	100_2_4	B	0	1	9	-		95	75_2_4	B	0.25	0.75	9	-		106	50_2_4	B	0.5	0.5	9	-		102	25_2_4	B	0.75	0.25	9	-
			67	100_2_4	B	0	1	10	-		88	75_2_4	B	0.25	0.75	10	9		54	50_2_4	B	0.5	0.5	10	9		121	25_2_4	B	0.75	0.25	10	9
			94	100_2_5	B	0	1	1	-		93	75_2_5	B	0.25	0.75	1	-		52	50_2_5	B	0.5	0.5	1	-		101	25_2_5	B	0.75	0.25	1	-
			64	100_2_5	B	0	1	2	-		87	75_2_5	B	0.25	0.75	2	-		109	50_2_5	B	0.5	0.5	2	-		93	25_2_5	B	0.75	0.25	2	-
			94	100_2_5	B	0	1	3	-		61	75_2_5	B	0.25	0.75	3	-		95	50_2_5	B	0.5	0.5	3	-		94	25_2_5	B	0.75	0.25	3	-
			59	100_2_5	B	0	1	4	-		64	75_2_5	B	0.25	0.75	4	-		76	50_2_5	B	0.5	0.5	4	-		91	25_2_5	B	0.75	0.25	4	-
			88	100_2_5	B	0	1	5	-		70	75_2_5	B	0.25	0.75	5	-		97	50_2_5	B	0.5	0.5	5	-		96	25_2_5	B	0.75	0.25	5	-
			124	100_2_5	B	0	1	6	-		65	75_2_5	B	0.25	0.75	6	-		87	50_2_5	B	0.5	0.5	6	-		110	25_2_5	B	0.75	0.25	6	-
			117	100_2_5	B	0	1	7	-		85	75_2_5	B	0.25	0.75	7	-		78	50_2_5	B	0.5	0.5	7	-		85	25_2_5	B	0.75	0.25	7	-
			115	100_2_5	B	0	1	8	-		59	75_2_5	B	0.25	0.75	8	-		68	50_2_5	B	0.5	0.5	8	-		76	25_2_5	B	0.75	0.25	8	-
			115	100_2_5	B	0	1	9	-		61	75_2_5	B	0.25	0.75	9	-		87	50_2_5	B	0.5	0.5	9	-		93	25_2_5	B	0.75	0.25	9	-
			57	100_2_5	B	0	1	10	-		77	75_2_5	B	0.25	0.75	10	9		55	50_2_5	B	0.5	0.5	10	9		85	25_2_5	B	0.75	0.25	10	9
			66	100_2_6	B	0	1	1	-		102	75_2_6	B	0.25	0.75	1	-		115	50_2_6	B	0.5	0.5	1	-		118	25_2_6	B	0.75	0.25	1	-
			83	100_2_6	B	0	1	2	-		55	75_2_6	B	0.25	0.75	2	-		38	50_2_6	B	0.5	0.5	2	-		69	25_2_6	B	0.75	0.25	2	-
			79	100_2_6	B	0	1	3	-		72	75_2_6	B	0.25	0.75	3	-		68	50_2_6	B	0.5	0.5	3	-		112	25_2_6	B	0.75	0.25	3	-
			75	100_2_6	B	0	1	4	-		66	75_2_6	B	0.25	0.75	4	-		46	50_2_6	B	0.5	0.5	4	-		83	25_2_6	B	0.75	0.25	4	-
			83	100_2_6	B	0	1	5	-		78	75_2_6	B	0.25	0.75	5	-		84	50_2_6	B	0.5	0.5	5	-		100	25_2_6	B	0.75	0.25	5	-
			71	100_2_6	B	0	1	6	-		60	75_2_6	B	0.25	0.75	6	-		85	50_2_6	B	0.5	0.5	6	-		114	25_2_6	B	0.75	0.25	6	-
			56	100_2_6	B	0	1	7	-		36	75_2_6	B	0.25	0.75	7	-		92	50_2_6	B	0.5	0.5	7	-		102	25_2_6	B	0.75	0.25	7	-
			47	100_2_6	B	0	1	8	-		34	75_2_6	B	0.25	0.75	8	-		80	50_2_6	B	0.5	0.5	8	-		126	25_2_6	B	0.75	0.25	8	-
			107	100_2_6	B	0	1	9	-		49	75_2_6	B	0.25	0.75	9	-		72	50_2_6	B	0.5	0.5	9	-		110	25_2_6	B	0.75	0.25	9	-
			97	100_2_6	B	0	1	10	-		79	75_2_6	B	0.25	0.75	10	9		97	50_2_6	B	0.5	0.5	10	9		87	25_2_6	B	0.75	0.25	10	9
			89	100_2_7	B	0	1	1	-		95	75_2_7	B	0.25	0.75	1	-		98	50_2_7	B	0.5	0.5	1	-		95	25_2_7	B	0.75	0.25	1	-
			80	100_2_7	B	0	1	2	-		63	75_2_7	B	0.25	0.75	2	-		89	50_2_7	B	0.5	0.5	2	-		34	25_2_7	B	0.75	0.25	2	-
			94	100_2_7	B	0	1	3	-		85	75_2_7	B	0.25	0.75	3	-		59	50_2_7	B	0.5	0.5	3	-		45	25_2_7	B	0.75	0.25	3	-
			83	100_2_7	B	0	1	4	-		64	75_2_7	B	0.25	0.75	4	-		44	50_2_7	B	0.5	0.5	4	-		61	25_2_7	B	0.75	0.25	4	-
			100	100_2_7	B	0	1	5	-		115	75_2_7	B	0.25	0.75	5	-		55	50_2_7	B	0.5	0.5	5	-		68	25_2_7	B	0.75	0.25	5	-
			96	100_2_7	B	0	1	6	-		108	75_2_7	B	0.25	0.75	6	-		39	50_2_7	B	0.5	0.5	6	-		95	25_2_7	B	0.75	0.25	6	-
			84	100_2_7	B	0	1	7	-		131	75_2_7	B	0.25	0.75	7	-		40	50_2_7	B	0.5	0.5	7	-		100	25_2_7	B	0.75	0.25	7	-
			66	100_2_7	B	0	1	8	-		100	75_2_7	B	0.25	0.75	8	-		54	50_2_7	B	0.5	0.5	8	-		82	25_2_7	B	0.75	0.25	8	-
			61	100_2_7	B	0	1	9	-		71	75_2_7	B	0.25	0.75	9	-		114	50_2_7	B	0.5	0.5	9	-		118	25_2_7	B	0.75	0.25	9	-
			72	100_2_7	B	0	1	10	-		59	75_2_7	B	0.25	0.75	10	9		67	50_2_7	B	0.5	0.5	10	9		95	25_2_7	B	0.75	0.25	10	9
			64	100_3_1	C	0	1	1	-		84	75_3_1	C	0.25	0.75	1	-		44	50_3_1	C	0.5	0.5	1	-		83	25_3_1	C	0.75	0.25	1	-
			66	100_3_1	C	0	1	2	-		80	75_3_1	C	0.25	0.75	2	-		58	50_3_1	C	0.5	0.5	2	-		77	25_3_1	C	0.75	0.25	2	-
			77	100_3_1	C	0	1	3	-		109	75_3_1	C	0.25	0.75	3	-		67	50_3_1	C	0.5	0.5	3	-		98	25_3_1	C	0.75	0.25	3	-
			58	100_3_1	C	0	1	4	-		72	75_3_1	C	0.25	0.75	4	-		79	50_3_1	C	0.5	0.5	4	-		83	25_3_1	C	0.75	0.25	4	-
			48	100_3_1	C	0	1	5	-		74	75_3_1	C	0.25	0.75	5	-		77	50_3_1	C	0.5	0.5	5	-		85	25_3_1	C	0.75	0.25	5	-
			67	100_3_1	C	0	1	6	-		127	75_3_1	C	0.25	0.75	6	-		102	50_3_1	C	0.5	0.5	6	-		46	25_3_1	C	0.75	0.25	6	-
			81	100_3_1	C	0	1	7	-		121	75_3_1	C	0.25	0.75	7	-		105	50_3_1	C	0.5	0.5	7	-		79	25_3_1	C	0.75	0.25	7	-
			102	100_3_1	C	0	1	8	-		45	75_3_1	C	0.25	0.75	8	-		102	50_3_1	C	0.5	0.5	8	-		73	25_3_1	C	0.75	0.25	8	-
			75	100_3_1	C	0	1	9	-		31	75_3_1	C	0.25	0.75	9	-		53	50_3_1	C	0.5	0.5	9	-		47	25_3_1	C	0.75	0.25	9	-
			68	100_3_1	C	0	1	10	-		110	75_3_1	C	0.25	0.75	10	9		96	50_3_1	C	0.5	0.5	10	9		84	25_3_1	C	0.75	0.25	10	9
			81	100_3_2	C	0	1	1	-		50	75_3_2	C	0.25	0.75	1	-		80	50_3_2	C	0.5	0.5	1	-		99	25_3_2	C	0.75	0.25	1	-
			77	100_3_2	C	0	1	2	-		71	75_3_2	C	0.25	0.75	2	-		100	50_3_2	C	0.5	0.5	2	-		76	25_3_2	C	0.75	0.25	2	-
			122	100_3_2	C	0	1	3	-		44	75_3_2	C	0.25	0.75	3	-		119	50_3_2	C	0.5	0.5	3	-		114	25_3_2	C	0.75	0.25	3	-
			99	100_3_2	C	0	1	4	-		36	75_3_2	C	0.25	0.75	4	-		89	50_3_2	C	0.5	0.5	4	-		97	25_3_2	C	0.75	0.25	4	-
			85	100_3_2	C	0	1	5	-		26	75_3_2	C	0.25	0.75	5	-		83	50_3_2	C	0.5	0.5	5	-		45	25_3_2	C	0.75	0.25	5	-
			99	100_3_2	C	0	1	6	-		38	75_3_2	C	0.25	0.75	6	-		86	50_3_2	C	0.5	0.5	6	-		100	25_3_2	C	0.75	0.25	6	-
			88	100_3_2	C	0	1	7	-		93	75_3_2	C	0.25	0.75	7	-		95	50_3_2	C	0.5	0.5	7	-		107	25_3_2	C	0.75	0.25	7	-
			108	100_3_2	C	0	1	8	-		88	75_3_2	C	0.25	0.75	8	-		64	50_3_2	C	0.5	0.5	8	-		93	25_3_2	C	0.75	0.25	8	-
			65	100_3_2	C	0	1	9	-		76	75_3_2	C	0.25	0.75	9	-		114	50_3_2	C	0.5	0.5	9	-		74	25_3_2	C	0.75	0.25	9	-
			86	100_3_2	C	0	1	10	-		83	75_3_2	C	0.25	0.75	10	9		77	50_3_2	C	0.5	0.5	10	9		75	25_3_2	C	0.75	0.25	10	9
			81	100_3_3	C	0	1	1	-		71	75_3_3	C	0.25	0.75	1	-		88	50_3_3	C	0.5	0.5	1	-		90	25_3_3	C	0.75	0.25	1	-
			76	100_3_3	C	0	1	2	-		87	75_3_3	C	0.25	0.75	2	-		72	50_3_3	C	0.5	0.5	2	-		77	25_3_3	C	0.75	0.25	2	-
			74	100_3_3	C	0	1	3	-		85	75_3_3	C	0.25	0.75	3	-		81	50_3_3	C	0.5	0.5	3	-		67	25_3_3	C	0.75	0.25	3	-
			82	100_3_3	C	0	1	4	-		82	75_3_3	C	0.25	0.75	4	-		63	50_3_3	C	0.5	0.5	4	-		81	25_3_3	C	0.75	0.25	4	-
			23	100_3_3	C	0	1	5	-		96	75_3_3	C	0.25	0.75	5	-		67	50_3_3	C	0.5	0.5	5	-		84	25_3_3	C	0.75	0.25	5	-
			25	100_3_3	C	0	1	6	-		120	75_3_3	C	0.25	0.75	6	-		53	50_3_3	C	0.5	0.5	6	-		83	25_3_3	C	0.75	0.25	6	-
			16	100_3_3	C	0	1	7	-		148	75_3_3	C	0.25	0.75	7	-		79	50_3_3	C	0.5	0.5	7	-		75	25_3_3	C	0.75	0.25	7	-
			99	100_3_3	C	0	1	8	-		103	75_3_3	C	0.25	0.75	8	-		73	50_3_3	C	0.5	0.5	8	-		50	25_3_3	C	0.75	0.25	8	-
			57	100_3_3	C	0	1	9	-		154	75_3_3	C	0.25	0.75	9	-		81	50_3_3	C	0.5	0.5	9	-		52	25_3_3	C	0.75	0.25	9	-
			0	100_3_3	C	0	1	10	-		88	75_3_3	C	0.25	0.75	10	9		70	50_3_3	C	0.5	0.5	10	9		78	25_3_3	C	0.75	0.25	10	9
			89	100_3_4	C	0	1	1	-		53	75_3_4	C	0.25	0.75	1	-		93	50_3_4	C	0.5	0.5	1	-		87	25_3_4	C	0.75	0.25	1	-
			86	100_3_4	C	0	1	2	-		76	75_3_4	C	0.25	0.75	2	-		91	50_3_4	C	0.5	0.5	2	-		60	25_3_4	C	0.75	0.25	2	-
			79	100_3_4	C	0	1	3	-		103	75_3_4	C	0.25	0.75	3	-		104	50_3_4	C	0.5	0.5	3	-		66	25_3_4	C	0.75	0.25	3	-
			65	100_3_4	C	0	1	4	-		67	75_3_4	C	0.25	0.75	4	-		112	50_3_4	C	0.5	0.5	4	-		75	25_3_4	C	0.75	0.25	4	-
			92	100_3_4	C	0	1	5	-		63	75_3_4	C	0.25	0.75	5	-		105	50_3_4	C	0.5	0.5	5	-		87	25_3_4	C	0.75	0.25	5	-
			112	100_3_4	C	0	1	6	-		118	75_3_4	C	0.25	0.75	6	-		128	50_3_4	C	0.5	0.5	6	-		99	25_3_4	C	0.75	0.25	6	-
			109	100_3_4	C	0	1	7	-		79	75_3_4	C	0.25	0.75	7	-		122	50_3_4	C	0.5	0.5	7	-		101	25_3_4	C	0.75	0.25	7	-
			82	100_3_4	C	0	1	8	-		131	75_3_4	C	0.25	0.75	8	-		97	50_3_4	C	0.5	0.5	8	-		86	25_3_4	C	0.75	0.25	8	-
			57	100_3_4	C	0	1	9	-		100	75_3_4	C	0.25	0.75	9	-		52	50_3_4	C	0.5	0.5	9	-		111	25_3_4	C	0.75	0.25	9	-
			70	100_3_4	C	0	1	10	-		58	75_3_4	C	0.25	0.75	10	9		71	50_3_4	C	0.5	0.5	10	9		92	25_3_4	C	0.75	0.25	10	9
			97	100_3_5	C	0	1	1	-		57	75_3_5	C	0.25	0.75	1	-		99	50_3_5	C	0.5	0.5	1	-		118	25_3_5	C	0.75	0.25	1	-
			96	100_3_5	C	0	1	2	-		66	75_3_5	C	0.25	0.75	2	-		45	50_3_5	C	0.5	0.5	2	-		91	25_3_5	C	0.75	0.25	2	-
			74	100_3_5	C	0	1	3	-		77	75_3_5	C	0.25	0.75	3	-		93	50_3_5	C	0.5	0.5	3	-		116	25_3_5	C	0.75	0.25	3	-
			54	100_3_5	C	0	1	4	-		95	75_3_5	C	0.25	0.75	4	-		69	50_3_5	C	0.5	0.5	4	-		88	25_3_5	C	0.75	0.25	4	-
			60	100_3_5	C	0	1	5	-		104	75_3_5	C	0.25	0.75	5	-		56	50_3_5	C	0.5	0.5	5	-		72	25_3_5	C	0.75	0.25	5	-
			98	100_3_5	C	0	1	6	-		119	75_3_5	C	0.25	0.75	6	-		73	50_3_5	C	0.5	0.5	6	-		77	25_3_5	C	0.75	0.25	6	-
			130	100_3_5	C	0	1	7	-		75	75_3_5	C	0.25	0.75	7	-		94	50_3_5	C	0.5	0.5	7	-		81	25_3_5	C	0.75	0.25	7	-
			101	100_3_5	C	0	1	8	-		62	75_3_5	C	0.25	0.75	8	-		66	50_3_5	C	0.5	0.5	8	-		65	25_3_5	C	0.75	0.25	8	-
			123	100_3_5	C	0	1	9	-		57	75_3_5	C	0.25	0.75	9	-		85	50_3_5	C	0.5	0.5	9	-		68	25_3_5	C	0.75	0.25	9	-
			110	100_3_5	C	0	1	10	-		79	75_3_5	C	0.25	0.75	10	9		60	50_3_5	C	0.5	0.5	10	9		93	25_3_5	C	0.75	0.25	10	9
			85	100_3_6	C	0	1	1	-		83	75_3_6	C	0.25	0.75	1	-		106	50_3_6	C	0.5	0.5	1	-		71	25_3_6	C	0.75	0.25	1	-
			63	100_3_6	C	0	1	2	-		71	75_3_6	C	0.25	0.75	2	-		59	50_3_6	C	0.5	0.5	2	-		82	25_3_6	C	0.75	0.25	2	-
			102	100_3_6	C	0	1	3	-		118	75_3_6	C	0.25	0.75	3	-		116	50_3_6	C	0.5	0.5	3	-		109	25_3_6	C	0.75	0.25	3	-
			100	100_3_6	C	0	1	4	-		92	75_3_6	C	0.25	0.75	4	-		90	50_3_6	C	0.5	0.5	4	-		80	25_3_6	C	0.75	0.25	4	-
			80	100_3_6	C	0	1	5	-		87	75_3_6	C	0.25	0.75	5	-		65	50_3_6	C	0.5	0.5	5	-		80	25_3_6	C	0.75	0.25	5	-
			81	100_3_6	C	0	1	6	-		101	75_3_6	C	0.25	0.75	6	-		71	50_3_6	C	0.5	0.5	6	-		99	25_3_6	C	0.75	0.25	6	-
			88	100_3_6	C	0	1	7	-		94	75_3_6	C	0.25	0.75	7	-		94	50_3_6	C	0.5	0.5	7	-		92	25_3_6	C	0.75	0.25	7	-
			71	100_3_6	C	0	1	8	-		57	75_3_6	C	0.25	0.75	8	-		89	50_3_6	C	0.5	0.5	8	-		46	25_3_6	C	0.75	0.25	8	-
			35	100_3_6	C	0	1	9	-		60	75_3_6	C	0.25	0.75	9	-		69	50_3_6	C	0.5	0.5	9	-		72	25_3_6	C	0.75	0.25	9	-
			51	100_3_6	C	0	1	10	-		105	75_3_6	C	0.25	0.75	10	9		69	50_3_6	C	0.5	0.5	10	9		80	25_3_6	C	0.75	0.25	10	9
			76	100_3_7	C	0	1	1	-		75	75_3_7	C	0.25	0.75	1	-		83	50_3_7	C	0.5	0.5	1	-		88	25_3_7	C	0.75	0.25	1	-
			68	100_3_7	C	0	1	2	-		77	75_3_7	C	0.25	0.75	2	-		66	50_3_7	C	0.5	0.5	2	-		76	25_3_7	C	0.75	0.25	2	-
			65	100_3_7	C	0	1	3	-		81	75_3_7	C	0.25	0.75	3	-		98	50_3_7	C	0.5	0.5	3	-		65	25_3_7	C	0.75	0.25	3	-
			59	100_3_7	C	0	1	4	-		67	75_3_7	C	0.25	0.75	4	-		77	50_3_7	C	0.5	0.5	4	-		63	25_3_7	C	0.75	0.25	4	-
			72	100_3_7	C	0	1	5	-		74	75_3_7	C	0.25	0.75	5	-		86	50_3_7	C	0.5	0.5	5	-		84	25_3_7	C	0.75	0.25	5	-
			92	100_3_7	C	0	1	6	-		68	75_3_7	C	0.25	0.75	6	-		82	50_3_7	C	0.5	0.5	6	-		73	25_3_7	C	0.75	0.25	6	-
			90	100_3_7	C	0	1	7	-		81	75_3_7	C	0.25	0.75	7	-		85	50_3_7	C	0.5	0.5	7	-		103	25_3_7	C	0.75	0.25	7	-
			65	100_3_7	C	0	1	8	-		73	75_3_7	C	0.25	0.75	8	-		78	50_3_7	C	0.5	0.5	8	-		60	25_3_7	C	0.75	0.25	8	-
			110	100_3_7	C	0	1	9	-		85	75_3_7	C	0.25	0.75	9	-		83	50_3_7	C	0.5	0.5	9	-		134	25_3_7	C	0.75	0.25	9	-
			95	100_3_7	C	0	1	10	-		139	75_3_7	C	0.25	0.75	10	9		62	50_3_7	C	0.5	0.5	10	9		50	25_3_7	C	0.75	0.25	10	9

## Sheet: Genotyping Regulated
Genotyping data for the regulated population size approach in Experiment 1. Founder populations were established with varying proportions of the TFT haplotype: 0%, 25%, 50%, and 75%. Individuals of the 0% ratio were not genotyped. For all other ratios, we genotyped seven females each per experimental population, and per generations one, five, and ten.				0% TFT									25% TFT									50% TFT									75% TFT
				Genotype frequency		Experimental population	Biological Replicate	Starting Proportion		Sampling generation	Females genotyped (n)		Genotype frequency		Experimental population	Biological Replicate	Starting Proportion		Sampling generation	Females genotyped (n)		Genotype frequency		Experimental population	Biological Replicate	Starting Proportion		Sampling generation	Females genotyped (n)		Genotype frequency		Experimental population	Biological Replicate	Starting Proportion		Sampling generation	Females genotyped (n)
				TFT	DAH			TFT	DAH				TFT	DAH			TFT	DAH				TFT	DAH			TFT	DAH				TFT	DAH			TFT	DAH
				0	1	100_1_8	A	0	1	1	-		0.285714	0.714286	75_1_8	A	0.25	0.75	1	7		0.285714	0.714286	50_1_8	A	0.5	0.5	1	7		0.714286	0.285714	25_1_8	A	0.75	0.25	1	7
				0	1	100_1_8	A	0	1	2	-		0.285714	0.714286	75_1_8	A	0.25	0.75	5	7		0.571429	0.428571	50_1_8	A	0.5	0.5	5	7		0.714286	0.285714	25_1_8	A	0.75	0.25	5	7
				0	1	100_1_8	A	0	1	5	-		0.142857	0.857143	75_1_8	A	0.25	0.75	10	7		0.571429	0.428571	50_1_8	A	0.5	0.5	10	7		0.714286	0.285714	25_1_8	A	0.75	0.25	10	7
				0	1	100_1_9	A	0	1	1	-		0.285714	0.714286	75_1_9	A	0.25	0.75	1	7		0.428571	0.571429	50_1_9	A	0.5	0.5	1	7		0.571429	0.428571	25_1_9	A	0.75	0.25	1	7
				0	1	100_1_9	A	0	1	2	-		0.142857	0.857143	75_1_9	A	0.25	0.75	5	7		0.714286	0.285714	50_1_9	A	0.5	0.5	5	7		0.571429	0.428571	25_1_9	A	0.75	0.25	5	7
				0	1	100_1_9	A	0	1	5	-		0.285714	0.714286	75_1_9	A	0.25	0.75	10	7		0.714286	0.285714	50_1_9	A	0.5	0.5	10	7		0.857143	0.142857	25_1_9	A	0.75	0.25	10	7
				0	1	100_1_10	A	0	1	1	-		0.142857	0.857143	75_1_10	A	0.25	0.75	1	7		0.571429	0.428571	50_1_10	A	0.5	0.5	1	7		0.571429	0.428571	25_1_10	A	0.75	0.25	1	7
				0	1	100_1_10	A	0	1	2	-		0.142857	0.857143	75_1_10	A	0.25	0.75	5	7		0.714286	0.285714	50_1_10	A	0.5	0.5	5	7		0.714286	0.285714	25_1_10	A	0.75	0.25	5	7
				0	1	100_1_10	A	0	1	5	-		0.142857	0.857143	75_1_10	A	0.25	0.75	10	7		0.857143	0.142857	50_1_10	A	0.5	0.5	10	7		1	0	25_1_10	A	0.75	0.25	10	7
				0	1	100_1_11	A	0	1	1	-		0.428571	0.571429	75_1_11	A	0.25	0.75	1	7		0.285714	0.714286	50_1_11	A	0.5	0.5	1	7		0.571429	0.428571	25_1_11	A	0.75	0.25	1	7
				0	1	100_1_11	A	0	1	2	-		0.142857	0.857143	75_1_11	A	0.25	0.75	5	7		0.857143	0.142857	50_1_11	A	0.5	0.5	5	7		0.714286	0.285714	25_1_11	A	0.75	0.25	5	7
				0	1	100_1_11	A	0	1	5	-		0.285714	0.714286	75_1_11	A	0.25	0.75	10	7		0.714286	0.285714	50_1_11	A	0.5	0.5	10	7		0.714286	0.285714	25_1_11	A	0.75	0.25	10	7
				0	1	100_1_12	A	0	1	1	-		0	1	75_1_12	A	0.25	0.75	1	7		0.571429	0.428571	50_1_12	A	0.5	0.5	1	7		0.714286	0.285714	25_1_12	A	0.75	0.25	1	7
				0	1	100_1_12	A	0	1	2	-		0	1	75_1_12	A	0.25	0.75	5	7		0.571429	0.428571	50_1_12	A	0.5	0.5	5	7		0.714286	0.285714	25_1_12	A	0.75	0.25	5	7
				0	1	100_1_12	A	0	1	5	-		0.142857	0.857143	75_1_12	A	0.25	0.75	10	7		0.571429	0.428571	50_1_12	A	0.5	0.5	10	7		1	0	25_1_12	A	0.75	0.25	10	7
				0	1	100_1_13	A	0	1	1	-		0.428571	0.571429	75_1_13	A	0.25	0.75	1	7		0.428571	0.571429	50_1_13	A	0.5	0.5	1	7		0.428571	0.571429	25_1_13	A	0.75	0.25	1	7
				0	1	100_1_13	A	0	1	2	-		0.285714	0.714286	75_1_13	A	0.25	0.75	5	7		0.428571	0.571429	50_1_13	A	0.5	0.5	5	7		0.571429	0.428571	25_1_13	A	0.75	0.25	5	7
				0	1	100_1_13	A	0	1	5	-		0	1	75_1_13	A	0.25	0.75	10	7		0.857143	0.142857	50_1_13	A	0.5	0.5	10	7		0.714286	0.285714	25_1_13	A	0.75	0.25	10	7
				0	1	100_1_14	A	0	1	1	-		0.285714	0.714286	75_1_14	A	0.25	0.75	1	7		0.571429	0.428571	50_1_14	A	0.5	0.5	1	7		0.571429	0.428571	25_1_14	A	0.75	0.25	1	7
				0	1	100_1_14	A	0	1	2	-		0.142857	0.857143	75_1_14	A	0.25	0.75	5	7		0.571429	0.428571	50_1_14	A	0.5	0.5	5	7		0.857143	0.142857	25_1_14	A	0.75	0.25	5	7
				0	1	100_1_14	A	0	1	5	-		0.142857	0.857143	75_1_14	A	0.25	0.75	10	7		0.714286	0.285714	50_1_14	A	0.5	0.5	10	7		0.857143	0.142857	25_1_14	A	0.75	0.25	10	7
				0	1	100_2_8	B	0	1	1	-		0.285714	0.714286	75_2_8	B	0.25	0.75	1	7		0.571429	0.428571	50_2_8	B	0.5	0.5	1	7		0.571429	0.428571	25_2_8	B	0.75	0.25	1	7
				0	1	100_2_8	B	0	1	2	-		0.142857	0.857143	75_2_8	B	0.25	0.75	5	7		0.428571	0.571429	50_2_8	B	0.5	0.5	5	7		0.571429	0.428571	25_2_8	B	0.75	0.25	5	7
				0	1	100_2_8	B	0	1	5	-		0.142857	0.857143	75_2_8	B	0.25	0.75	10	7		0.857143	0.142857	50_2_8	B	0.5	0.5	10	7		0.714286	0.285714	25_2_8	B	0.75	0.25	10	7
				0	1	100_2_9	B	0	1	1	-		0.285714	0.714286	75_2_9	B	0.25	0.75	1	7		0.285714	0.714286	50_2_9	B	0.5	0.5	1	7		0.857143	0.142857	25_2_9	B	0.75	0.25	1	7
				0	1	100_2_9	B	0	1	2	-		0.142857	0.857143	75_2_9	B	0.25	0.75	5	7		0.714286	0.285714	50_2_9	B	0.5	0.5	5	7		0.571429	0.428571	25_2_9	B	0.75	0.25	5	7
				0	1	100_2_9	B	0	1	5	-		0.285714	0.714286	75_2_9	B	0.25	0.75	10	7		0.714286	0.285714	50_2_9	B	0.5	0.5	10	7		0.714286	0.285714	25_2_9	B	0.75	0.25	10	7
				0	1	100_2_10	B	0	1	1	-		0.142857	0.857143	75_2_10	B	0.25	0.75	1	7		0.571429	0.428571	50_2_10	B	0.5	0.5	1	7		0.714286	0.285714	25_2_10	B	0.75	0.25	1	7
				0	1	100_2_10	B	0	1	2	-		0.142857	0.857143	75_2_10	B	0.25	0.75	5	7		0.714286	0.285714	50_2_10	B	0.5	0.5	5	7		0.714286	0.285714	25_2_10	B	0.75	0.25	5	7
				0	1	100_2_10	B	0	1	5	-		0	1	75_2_10	B	0.25	0.75	10	7		0.571429	0.428571	50_2_10	B	0.5	0.5	10	7		0.857143	0.142857	25_2_10	B	0.75	0.25	10	7
				0	1	100_2_11	B	0	1	1	-		0.142857	0.857143	75_2_11	B	0.25	0.75	1	7		0.285714	0.714286	50_2_11	B	0.5	0.5	1	7		0.571429	0.428571	25_2_11	B	0.75	0.25	1	7
				0	1	100_2_11	B	0	1	2	-		0	1	75_2_11	B	0.25	0.75	5	7		0.571429	0.428571	50_2_11	B	0.5	0.5	5	7		0.714286	0.285714	25_2_11	B	0.75	0.25	5	7
				0	1	100_2_11	B	0	1	5	-		0.285714	0.714286	75_2_11	B	0.25	0.75	10	7		0.714286	0.285714	50_2_11	B	0.5	0.5	10	7		0.714286	0.285714	25_2_11	B	0.75	0.25	10	7
				0	1	100_2_12	B	0	1	1	-		0.285714	0.714286	75_2_12	B	0.25	0.75	1	7		0.571429	0.428571	50_2_12	B	0.5	0.5	1	7		0.714286	0.285714	25_2_12	B	0.75	0.25	1	7
				0	1	100_2_12	B	0	1	2	-		0.285714	0.714286	75_2_12	B	0.25	0.75	5	7		0.857143	0.142857	50_2_12	B	0.5	0.5	5	7		0.857143	0.142857	25_2_12	B	0.75	0.25	5	7
				0	1	100_2_12	B	0	1	5	-		0	1	75_2_12	B	0.25	0.75	10	7		0.714286	0.285714	50_2_12	B	0.5	0.5	10	7		0.857143	0.142857	25_2_12	B	0.75	0.25	10	7
				0	1	100_2_13	B	0	1	1	-		0.285714	0.714286	75_2_13	B	0.25	0.75	1	7		0.285714	0.714286	50_2_13	B	0.5	0.5	1	7		0.714286	0.285714	25_2_13	B	0.75	0.25	1	7
				0	1	100_2_13	B	0	1	2	-		0.142857	0.857143	75_2_13	B	0.25	0.75	5	7		0.714286	0.285714	50_2_13	B	0.5	0.5	5	7		0.714286	0.285714	25_2_13	B	0.75	0.25	5	7
				0	1	100_2_13	B	0	1	5	-		0.142857	0.857143	75_2_13	B	0.25	0.75	10	7		0.428571	0.571429	50_2_13	B	0.5	0.5	10	7		0.571429	0.428571	25_2_13	B	0.75	0.25	10	7
				0	1	100_2_14	B	0	1	1	-		0.428571	0.571429	75_2_14	B	0.25	0.75	1	7		0.428571	0.571429	50_2_14	B	0.5	0.5	1	7		0.428571	0.571429	25_2_14	B	0.75	0.25	1	7
				0	1	100_2_14	B	0	1	2	-		0	1	75_2_14	B	0.25	0.75	5	7		0.428571	0.571429	50_2_14	B	0.5	0.5	5	7		0.714286	0.285714	25_2_14	B	0.75	0.25	5	7
				0	1	100_2_14	B	0	1	5	-		0.285714	0.714286	75_2_14	B	0.25	0.75	10	7		0.714286	0.285714	50_2_14	B	0.5	0.5	10	7		0.857143	0.142857	25_2_14	B	0.75	0.25	10	7
				0	1	100_3_8	C	0	1	1	-		0.142857	0.857143	75_3_8	C	0.25	0.75	1	7		0.571429	0.428571	50_3_8	C	0.5	0.5	1	7		0.714286	0.285714	25_3_8	C	0.75	0.25	1	7
				0	1	100_3_8	C	0	1	2	-		0.142857	0.857143	75_3_8	C	0.25	0.75	5	7		0.571429	0.428571	50_3_8	C	0.5	0.5	5	7		0.714286	0.285714	25_3_8	C	0.75	0.25	5	7
				0	1	100_3_8	C	0	1	5	-		0	1	75_3_8	C	0.25	0.75	10	7		0.571429	0.428571	50_3_8	C	0.5	0.5	10	7		0.857143	0.142857	25_3_8	C	0.75	0.25	10	7
				0	1	100_3_9	C	0	1	1	-		0.142857	0.857143	75_3_9	C	0.25	0.75	1	7		0.428571	0.571429	50_3_9	C	0.5	0.5	1	7		0.428571	0.571429	25_3_9	C	0.75	0.25	1	7
				0	1	100_3_9	C	0	1	2	-		0.428571	0.571429	75_3_9	C	0.25	0.75	5	7		0.714286	0.285714	50_3_9	C	0.5	0.5	5	7		0.714286	0.285714	25_3_9	C	0.75	0.25	5	7
				0	1	100_3_9	C	0	1	5	-		0.285714	0.714286	75_3_9	C	0.25	0.75	10	7		0.857143	0.142857	50_3_9	C	0.5	0.5	10	7		0.857143	0.142857	25_3_9	C	0.75	0.25	10	7
				0	1	100_3_10	C	0	1	1	-		0.285714	0.714286	75_3_10	C	0.25	0.75	1	7		0.571429	0.428571	50_3_10	C	0.5	0.5	1	7		0.714286	0.285714	25_3_10	C	0.75	0.25	1	7
				0	1	100_3_10	C	0	1	2	-		0	1	75_3_10	C	0.25	0.75	5	7		0.571429	0.428571	50_3_10	C	0.5	0.5	5	7		0.571429	0.428571	25_3_10	C	0.75	0.25	5	7
				0	1	100_3_10	C	0	1	5	-		0.142857	0.857143	75_3_10	C	0.25	0.75	10	7		0.714286	0.285714	50_3_10	C	0.5	0.5	10	7		0.714286	0.285714	25_3_10	C	0.75	0.25	10	7
				0	1	100_3_11	C	0	1	1	-		0.285714	0.714286	75_3_11	C	0.25	0.75	1	7		0.285714	0.714286	50_3_11	C	0.5	0.5	1	7		0.714286	0.285714	25_3_11	C	0.75	0.25	1	7
				0	1	100_3_11	C	0	1	2	-		0.142857	0.857143	75_3_11	C	0.25	0.75	5	7		0.714286	0.285714	50_3_11	C	0.5	0.5	5	7		0.857143	0.142857	25_3_11	C	0.75	0.25	5	7
				0	1	100_3_11	C	0	1	5	-		0.142857	0.857143	75_3_11	C	0.25	0.75	10	7		0.714286	0.285714	50_3_11	C	0.5	0.5	10	7		0.857143	0.142857	25_3_11	C	0.75	0.25	10	7
				0	1	100_3_12	C	0	1	1	-		0.428571	0.571429	75_3_12	C	0.25	0.75	1	7		0.571429	0.428571	50_3_12	C	0.5	0.5	1	7		0.571429	0.428571	25_3_12	C	0.75	0.25	1	7
				0	1	100_3_12	C	0	1	2	-		0.285714	0.714286	75_3_12	C	0.25	0.75	5	7		0.571429	0.428571	50_3_12	C	0.5	0.5	5	7		0.571429	0.428571	25_3_12	C	0.75	0.25	5	7
				0	1	100_3_12	C	0	1	5	-		0.142857	0.857143	75_3_12	C	0.25	0.75	10	7		0.571429	0.428571	50_3_12	C	0.5	0.5	10	7		0.714286	0.285714	25_3_12	C	0.75	0.25	10	7
				0	1	100_3_13	C	0	1	1	-		0.285714	0.714286	75_3_13	C	0.25	0.75	1	7		0.428571	0.571429	50_3_13	C	0.5	0.5	1	7		0.428571	0.571429	25_3_13	C	0.75	0.25	1	7
				0	1	100_3_13	C	0	1	2	-		0	1	75_3_13	C	0.25	0.75	5	7		0.714286	0.285714	50_3_13	C	0.5	0.5	5	7		0.857143	0.142857	25_3_13	C	0.75	0.25	5	7
				0	1	100_3_13	C	0	1	5	-		0.142857	0.857143	75_3_13	C	0.25	0.75	10	7		0.428571	0.571429	50_3_13	C	0.5	0.5	10	7		0.714286	0.285714	25_3_13	C	0.75	0.25	10	7
				0	1	100_3_14	C	0	1	1	-		0.142857	0.857143	75_3_14	C	0.25	0.75	1	7		0.285714	0.714286	50_3_14	C	0.5	0.5	1	7		0.857143	0.142857	25_3_14	C	0.75	0.25	1	7
				0	1	100_3_14	C	0	1	2	-		0.142857	0.857143	75_3_14	C	0.25	0.75	5	7		0.428571	0.571429	50_3_14	C	0.5	0.5	5	7		0.857143	0.142857	25_3_14	C	0.75	0.25	5	7
				0	1	100_3_14	C	0	1	5	-		0.428571	0.571429	75_3_14	C	0.25	0.75	10	7		0.571429	0.428571	50_3_14	C	0.5	0.5	10	7		1	0	25_3_14	C	0.75	0.25	10	7

## Sheet: Genotyping Fluctuating
Genotyping data for thefluctuating population size approach in Experiment 2. Founder populations were established with varying proportions of the TFT haplotype: 0%, 25%, 50%, and 75%. Individuals of the 0% ratio were not genotyped. For all other ratios, we genotyped nine females each per experimental population at generation 10.
				0% TFT									25% TFT									50% TFT									75% TFT
				Genotype frequency		Experimental population	Biological Replicate	Starting Proportion		Sampling generation	Females genotyped (n)		Genotype frequency		Experimental population	Biological Replicate	Starting Proportion		Sampling generation	Females genotyped (n)		Genotype frequency		Experimental population	Biological Replicate	Starting Proportion		Sampling generation	Females genotyped (n)		Genotype frequency		Experimental population	Biological Replicate	Starting Proportion		Sampling generation	Females genotyped (n)
				TFT	DAH			TFT	DAH				TFT	DAH			TFT	DAH				TFT	DAH			TFT	DAH				TFT	DAH			TFT	DAH
				0	1	100_1_1	A	0	1	10	9		0.222222	0.777778	75_1_1	A	0.25	0.75	10	9		0.333333	0.666667	50_1_1	A	0.5	0.5	10	9		0.333333	0.666667	25_1_1	A	0.75	0.25	10	9
				0	1	100_1_2	A	0	1	10	9		0.111111	0.888889	75_1_2	A	0.25	0.75	10	9		0.666667	0.888889	50_1_2	A	0.5	0.5	10	9	5 heteroplasmies	1	0	25_1_2	A	0.75	0.25	10	9
				0	1	100_1_3	A	0	1	10	9		0.222222	0.777778	75_1_3	A	0.25	0.75	10	9		0.333333	0.666667	50_1_3	A	0.5	0.5	10	9		0.888889	0.111111	25_1_3	A	0.75	0.25	10	9
				0	1	100_1_4	A	0	1	10	9		0.444444	0.555556	75_1_4	A	0.25	0.75	10	9		0.666667	0.333333	50_1_4	A	0.5	0.5	10	9		0.888889	0.111111	25_1_4	A	0.75	0.25	10	9
				0	1	100_1_5	A	0	1	10	9		0.333333	0.666667	75_1_5	A	0.25	0.75	10	9		0	1	50_1_5	A	0.5	0.5	10	9		0.333333	0.666667	25_1_5	A	0.75	0.25	10	9
				0	1	100_1_6	A	0	1	10	9		0.333333	0.666667	75_1_6	A	0.25	0.75	10	9		0.666667	0.333333	50_1_6	A	0.5	0.5	10	9		0.888889	0.111111	25_1_6	A	0.75	0.25	10	9
				0	1	100_1_7	A	0	1	10	9		0.777778	0.222222	75_1_7	A	0.25	0.75	10	9		0.444444	0.555556	50_1_7	A	0.5	0.5	10	9		0.888889	0.111111	25_1_7	A	0.75	0.25	10	9
				0	1	100_2_1	B	0	1	10	9		0.111111	0.888889	75_2_1	B	0.25	0.75	10	9		0.333333	0.666667	50_2_1	B	0.5	0.5	10	9		0.666667	0.333333	25_2_1	B	0.75	0.25	10	9
				0	1	100_2_2	B	0	1	10	9		0	1	75_2_2	B	0.25	0.75	10	9		0.666667	1	50_2_2	B	0.5	0.5	10	9	6 heteroplasmies	1	0	25_2_2	B	0.75	0.25	10	9
				0	1	100_2_3	B	0	1	10	9		0.222222	0.777778	75_2_3	B	0.25	0.75	10	9		0.333333	0.666667	50_2_3	B	0.5	0.5	10	9		0.777778	0.222222	25_2_3	B	0.75	0.25	10	9
				0	1	100_2_4	B	0	1	10	9		0.333333	0.666667	75_2_4	B	0.25	0.75	10	9		1	0	50_2_4	B	0.5	0.5	10	9		0.555556	0.444444	25_2_4	B	0.75	0.25	10	9
				0	1	100_2_5	B	0	1	10	9		0.666667	0.333333	75_2_5	B	0.25	0.75	10	9		0.777778	0.222222	50_2_5	B	0.5	0.5	10	9		0.666667	0.333333	25_2_5	B	0.75	0.25	10	9
				0	1	100_2_6	B	0	1	10	9		0	1	75_2_6	B	0.25	0.75	10	9		0.555556	0.444444	50_2_6	B	0.5	0.5	10	9		0.777778	0.222222	25_2_6	B	0.75	0.25	10	9
				0	1	100_2_7	B	0	1	10	9		1	0	75_2_7	B	0.25	0.75	10	9		1	0	50_2_7	B	0.5	0.5	10	9		0.555556	0.444444	25_2_7	B	0.75	0.25	10	9
				0	1	100_3_1	C	0	1	10	9		0	1	75_3_1	C	0.25	0.75	10	9		0.555556	0.444444	50_3_1	C	0.5	0.5	10	9		1	0	25_3_1	C	0.75	0.25	10	9
				0	1	100_3_2	C	0	1	10	9		0.555556	0.444444	75_3_2	C	0.25	0.75	10	9		0.444444	0.555556	50_3_2	C	0.5	0.5	10	9		0.444444	0.555556	25_3_2	C	0.75	0.25	10	9
				0	1	100_3_3	C	0	1	10	9		0.111111	0.888889	75_3_3	C	0.25	0.75	10	9		0.666667	0.333333	50_3_3	C	0.5	0.5	10	9		0.888889	0.111111	25_3_3	C	0.75	0.25	10	9
				0	1	100_3_4	C	0	1	10	9		0.444444	0.555556	75_3_4	C	0.25	0.75	10	9		0.333333	0.666667	50_3_4	C	0.5	0.5	10	9		1	0	25_3_4	C	0.75	0.25	10	9
				0	1	100_3_5	C	0	1	10	9		0	1	75_3_5	C	0.25	0.75	10	9		0.666667	0.333333	50_3_5	C	0.5	0.5	10	9		0.888889	0.111111	25_3_5	C	0.75	0.25	10	9
				0	1	100_3_6	C	0	1	10	9		0.777778	0.222222	75_3_6	C	0.25	0.75	10	9		1	0	50_3_6	C	0.5	0.5	10	9		0.888889	0.111111	25_3_6	C	0.75	0.25	10	9
				0	1	100_3_7	C	0	1	10	9		0.666667	0.333333	75_3_7	C	0.25	0.75	10	9		1	0	50_3_7	C	0.5	0.5	10	9		0.333333	0.666667	25_3_7	C	0.75	0.25	10	9
